# Supplementary material for: The association between serum uric acid and diabetic complications in patients with type 2 diabetes mellitus by gender: a cross-sectional study
Source: PeerJ. 2021 Jan 13;9:e10691. doi: 10.7717/peerj.10691 (PMC7811288; doi:10.7717/peerj.10691)
Supplement: Supplemental Information 1 [file peerj-09-10691-s001.xlsx]

## Sheet: NAFLD-male
			Multicollinearity test
			parameters											Goodness of fit test
			Varible	df	B	SEM	t value	Pr > |t|	TOL	VIF				Hosmer-Lemeshow test
			Intercept	1	-0.502	0.25	-2.013	0.044	.	0				χ2	df	Pr > |χ2|
			age	1	-0.002	0.001	-1.588	0.112	0.401	2.495				7.18	8	0.517
			duration	1	-0.002	0.002	-1.032	0.302	0.743	1.347
			BMI	1	0.038	0.004	10.457	<.0001	0.854	1.171
			SBP	1	0.001	0.001	0.675	0.5	0.552	1.811
			DBP	1	0.002	0.001	1.612	0.107	0.561	1.784
			BUN	1	-0.01	0.008	-1.3	0.194	0.735	1.36
			eGFR	1	-0.001	0.001	-1.277	0.202	0.28	3.568
			UA	1	0.0001	0.0001	1.65	0.099	0.773	1.293
			TC	1	-0.03	0.027	-1.115	0.265	0.139	7.179
			TG	1	0.024	0.009	2.709	0.007	0.25	3.999
			HDL	1	0.013	0.052	0.259	0.796	0.677	1.477
			LDL	1	0.042	0.03	1.392	0.164	0.174	5.757
			FFA	1	2.198e-05	1e-05	0.421	0.674	0.958	1.044
			FBG	1	0.001	0.003	0.269	0.788	0.545	1.835
			PBG	1	0.002	0.003	0.675	0.5	0.403	2.48
			HbA1c%	1	-0.004	0.007	-0.591	0.555	0.48	2.083
			Conclusion：There is no collinearity problem in this model. P value of Goodness-of-fit test was >0.05, indicating that the established model fits well.

## Sheet: NAFLD-female
		Multicollinearity test												Goodness of fit test
		parameters												Hosmer -Lemeshow test
		Varible	df	B	SEM	t value	Pr > |t|	TOL	VIF					χ2	df	Pr > |χ2|
		Intercept	1	-1.519	0.47	-3.232	0.001	.	0					11.15	8	0.193
		age	1	0.003	0.002	1.291	0.197	0.277	3.604
		duration	1	-0.006	0.002	-2.314	0.021	0.79	1.265
		BMI	1	0.038	0.004	9.123	<.0001	0.884	1.131
		SBP	1	0.001	0.001	1.103	0.269	0.593	1.686
		DBP	1	0.0004	0.002	0.174	0.862	0.625	1.6
		CR	1	0.001	0.002	0.619	0.536	0.156	6.413
		ALB	1	-0.002	0.001	-1.415	0.157	0.791	1.264
		UA	1	0.0007	0.0002	2.749	0.006	0.734	1.362
		TC	1	-0.071	0.035	-2.041	0.042	0.14	7.145
		TG	1	0.061	0.14	4.193	<0.001	0.382	2.619
		LDL	1	0.101	0.037	2.708	0.007	0.171	5.864
		HDL	1	-0.022	0.064	-0.339	0.735	0.584	1.712
		FFA	1	-1.191e-05	0.0001	-0.189	0.85	0.951	1.051
		FBG	1	-0.012	0.007	-1.639	0.102	0.299	3.342
		PBG	1	0.006	0.004	1.241	0.215	0.335	2.989
		HbA1c%	1	0.004	0.01	0.445	0.657	0.437	2.288
		Conclusion：There is no collinearity problem in this model. P value of Goodness-of-fit test was >0.05, indicating that the established model fits well.

## Sheet: DN-male
		Multicollinearity test												Goodness of fit test
		parameters												Hosmer -Lemeshow test
		Varible	df	B	SEM	t value	Pr > |t|	TOL	VIF					χ2	df	Pr > |χ2|
		Intercept	1	-0.506	0.066	-7.659	<.0001	.	0					6.556	8	0.585
		age	1	0.003	0.0003124	5.732	<.0001	0.64	1.563
		duration	1	-0.0013	0.00061035	-1.152	0.259	0.746	1.341
		SBP	1	0.00040277	0.0001953	4.008	<0.0001	0.559	1.788
		BUN	1	0.0452	0.00216	15.555	<.0001	0.862	1.161
		TC	1	-0.0001	0.011	-0.108	0.914	0.14	7.156
		UA	1	0.00011687	3.46e-05	4.965	0.0007	0.845	1.183
		TG	1	-0.0001	0.003	-0.233	0.816	0.253	3.959
		HDL	1	-0.021	0.02	-1.042	0.298	0.686	1.458
		LDL	1	0.006	0.012	0.526	0.599	0.174	5.743
		FBG	1	-0.002	0.00152	-1.127	0.26	0.547	1.828
		PBG	1	0.001	0.0017	0.551	0.582	0.405	2.472
		HbA1c%	1	0.005	0.003	1.868	0.062	0.483	2.07
		DBP	1	0.001	-0.064	-2.273	0.023	0.564	1.773
		FFA	1	-9.701e-06	1e-05	-0.47	0.639	0.959	1.042
		BMI	1	-0.002	0.001	-1.055	0.292	0.855	1.17
		Conclusion：There is no collinearity problem in this model. P value of Goodness-of-fit test was >0.05, indicating that the established model fits well.

## Sheet: DN-female
		Multicollinearity test											Goodness of fit test
		parameters											Hosmer -Lemeshow test
		Varible	df	B	SEM	t value	Pr > |t|	TOL	VIF				χ2	df	Pr > |χ2|
		Intercept	1	-0.394	0.09	-4.391	<.0001	.	0				7.886	8	0.445
		age	1	0.001	0.001	2.031	0.043	0.662	1.511
		duration	1	0.002	0.001	1.705	0.089	0.793	1.26
		SBP	1	0.001	0.0001	2.872	0.004	2.598	1.672
		BUN	1	0.047	0.004	12.282	<.0001	0.85	1.176
		UA	1	0.0001	0.0001	4.765	<.0001	0.779	1.283
		TC	1	0.023	0.016	1.483	0.138	0.141	7.115
		TG	1	-0.008	0.006	-1.173	0.241	0.382	2.615
		HDL	1	-0.08	0.029	-2.789	0.005	0.59	1.704
		LDL	1	-0.017	0.017	-0.987	0.324	0.172	5.852
		FBG	1	-0.008	0.003	-2.564	0.01	0.304	3.284
		PBG	1	0.001	0.002	0.52	0.603	0.336	2.974
		HbA1c%	1	0.01	0.004	2.271	0.022	0.441	2.267
		DBP	1	-0.002	0.001	-1.935	0.053	0.628	1.591
		FFA	1	1.936e-05	0.0001	0.744	0.457	0.953	1.049
		BMI	1	-0.003	0.002	-1.42	0.156	0.886	1.129
		Conclusion：There is no collinearity problem in this model. P value of Goodness-of-fit test was >0.05, indicating that the established model fits well.

## Sheet: DR-male
Multicollinearity test											Goodness of fit test
parameters											Hosmer -Lemeshow test
Varible	df	B	SEM	t value	Pr > |t|	TOL	VIF				χ2	df	Pr > |χ2|
Intercept	1	0.082	0.142	0.574	0.566	.	0				10.478	8	0.233
age	1	-0.001	0.0008	-1.711	0.087	0.401	2.495
duration	1	0.00491	0.001	3.91	<.0001	0.743	1.347
SBP	1	0.0007	0.0003	1.764	0.078	0.552	1.811
DBP	1	-0.001	0.001	-0.85	0.396	0.561	1.784
BUN	1	0.0001	0.0045	-0.04	0.935	0.735	1.36
UA	1	0.0001	0.0001	-1.575	0.115	0.773	1.293
CR	1	0.0004	0.0003	1.443	0.149	0.448	2.235
ALB	1	0.0007	0.0005	1.145	0.252	0.83	1.204
eGFR	1	-0.0004	0.0005	-0.84	0.401	0.28	3.568
TC	1	0.018	0.015	1.151	0.25	0.139	7.179
TG	1	-0.009	0.005	-1.9	0.058	0.251	3.999
HDL	1	-0.008	0.029	-0.278	0.781	0.677	1.477
LDL	1	-0.033	0.017	1.917	0.055	0.174	5.757
FBG	1	0.003	0.002	1.443	0.149	0.545	1.835
PBG	1	-0.0005	0.002	-0.222	0.824	0.403	2.48
HbA1c%	1	-0.003	0.004	-0.674	0.5	0.481	2.083
FFA	1	-5.929e-05	2.969e-05	-2.128	0.033	0.958	1.044
BMI	1	0.004	0.002	1.948	0.052	0.854	1.171
Conclusion：There is no collinearity problem in this model. P value of Goodness-of-fit test was >0.05, indicating that the established model fits well.

## Sheet: DR-female
	Multicollinearity test											Goodness of fit test
	parameters											Hosmer -Lemeshow test
	Varible	df	B	SEM	t value	Pr > |t|	TOL	VIF				χ2	df	Pr > |χ2|
	Intercept	1	0.36	0.303	1.185	0.236	.	0				8.874	8	0.353
	age	1	-0.002	0.002	-1.222	0	0.277	3.604
	duration	1	0.004	0.002	2.6	0.009	0.79	1.265
	SBP	1	0.0008	0.0005	1.699	0.09	0.593	1.686
	BUN	1	9.54e-05	0.006	0.015	0.988	0.619	1.616
	UA	1	-7.874e-05	0.0001	-0.672	0.502	0.734	1.362
	CR	1	-0.001	0.001	-0.681	0.496	0.156	6.413
	ALB	1	0.0003	0.0008	0.321	0.748	0.791	1.264
	TC	1	-0.023	0.023	-1.029	0.304	0.141	7.145
	TG	1	0.006	0.009	0.685	0.493	0.382	2.619
	HDL	1	-0.002	0.041	-0.054	0.957	0.584	1.712
	LDL	1	0.014	0.024	0.563	0.574	0.171	5.864
	FBG	1	-0.0004	0.005	-0.102	0.919	0.299	3.342
	PBG	1	0.002	0.003	0.734	0.463	0.335	2.989
	HbA1c%	1	4.272e-05	0.006	0.007	0.995	0.437	2.288
	FFA	1	5.199e-05	4.052e-05	1.279	0.201	0.951	1.051
	BMI	1	0.0001	0.003	0.04	0.968	0.884	1.131
	Conclusion：There is no collinearity problem in this model. P value of Goodness-of-fit test was >0.05, indicating that the established model fits well.

## Sheet: DPN-male
	Multicollinearity test											Goodness of fit test
	parameters											Hosmer -Lemeshow test
	Varible	df	B	SEM	t value	Pr > |t|	TOL	VIF				χ2	df	Pr > |χ2|
	Intercept	1	0.077	0.167	0.462	0.644	.	0				6.9066	8	0.5467
	age	1	0.0015	0.001	1.328	0.184	0.401	2.495
	duration	1	0.005	0.001	3.452	0.001	0.743	1.347
	SBP	1	0.001	0.001	1.422	0.155	0.552	1.811
	DBP	1	-0.001	0.001	-1.007	0.314	0.562	1.784
	BUN	1	0.003	0.005	0.548	0.584	0.735	1.36
	UA	1	9.137e-05	0.0001	1.041	0.298	0.773	1.293
	CR	1	-0.0002	0.0003	-0.512	0.609	0.448	2.235
	ALB	1	-0.0009	0.0006	-1.402	0.161	0.83	1.204
	eGFR	1	-0.0004	0.0006	-0.622	0.534	0.28	3.568
	TC	1	-0.005	0.018	-0.287	0.774	0.139	7.179
	TG	1	-0.002	0.006	-0.364	0.716	0.25	3.999
	HDL	1	0.092	0.034	2.672	0.008	0.677	1.477
	LDL	1	-0.022	0.023	-1.125	0.261	0.174	5.757
	FBG	1	0.01	0.002	4.274	<.0001	0.545	1.835
	PBG	1	0.0005	0.002	0.222	0.825	0.403	2.48
	HbA1c%	1	-0.011	0.005	-2.279	0.023	0.481	2.083
	FFA	1	-5.103e-05	3.478e-05	-1.477	0.142	0.958	1.044
	BMI	1	-0.002	0.002	0.825	0.41	0.854	1.171
		Conclusion：There is no collinearity problem in this model. P value of Goodness-of-fit test was >0.05, indicating that the established model fits well.

## Sheet: DPN- female
	Multicollinearity test											Goodness of fit test
	parameters											Hosmer -Lemeshow test
	Varible	df	B	SEM	t value	Pr > |t|	TOL	VIF				χ2	df	Pr > |χ2|
	Intercept	1	-0.62	0.327	-1.895	0.058	.	0				8.874	8	0.353
	age	1	0.002	0.002	1.397	0.163	0.277	3.604
	duration	1	0.008	0.002	4.594	<.0001	0.79	1.265
	SBP	1	0.001	0.001	1.274	0.203	0.593	1.686
	BUN	1	-0.003	0.007	-0.485	0.627	0.619	1.616
	UA	1	-7.399e-05	0.0001	-0.586	0.558	0.734	1.362
	CR	1	0.002	0.001	1.676	0.094	0.156	6.413
	ALB	1	0.0005	0.001	0.489	0.625	0.791	1.264
	TC	1	0.008	0.024	0.462	0.644	0.14	7.145
	TG	1	-0.008	0.01	-0.749	0.454	0.382	2.619
	HDL	1	0.067	0.044	1.51	0.131	0.584	1.712
	LDL	1	-0.03	0.026	-1.173	0.241	0.171	5.864
	FBG	1	0.003	0.005	0.503	0.615	0.299	3.342
	PBG	1	0.001	0.003	0.45	0.652	0.335	2.989
	HbA1c%	1	-0.006	0.007	-0.93	0.353	0.437	2.288
	FFA	1	3.787e-05	0.0001	0.864	0.388	0.951	1.051
	BMI	1	0.006	0.003	1.982	0.048	0.884	1.131
		Conclusion：There is no collinearity problem in this model. P value of Goodness-of-fit test was >0.05, indicating that the established model fits well.
