# Supplementary material for: The association between serum uric acid and diabetic complications in patients with type 2 diabetes mellitus by gender: a cross-sectional study
Source: PeerJ. 2021 Jan 13;9:e10691. doi: 10.7717/peerj.10691 (PMC7811288; doi:10.7717/peerj.10691)
Supplement: Supplemental Information 2 [file peerj-09-10691-s002.xlsx]

## Sheet: Sheet20
gender （1: male; 2: female)	age (years)	duration (years)	smoking ( 0:No; 1: Yes)	alcohol( 0:No; 1: Yes)	family_history( 0:No; 1: Yes)	BMI	SBP(mmHg)	DBP(mmHg)	BUN(mmol/l)	CR(μmol/l)	ALB(mg/24h)	UA(μmmol/l)	TC(mmol/l)	TG(mmol/l)	HDL(mmol/l)	LDL(mmol/l)	FFA(μmol/l)	FBG(mmo/l)	PBG(mmo/l)	HbA1c%	KDOQI	CKD_EPI	NAFLD( 0:No; 1: Yes)	DR( 0:No; 1: Yes)	DN( 0:No; 1: Yes)	DPN( 0:No; 1: Yes)
1	20	0.1	0	0	0	18.4	99	64	3.7	44	22.66	215.4	4.6	0.58	1.26	3.33	259.22	5.82	19.93	9.8	1	156.29	0	0	0	0
1	26	0	0	0	0	31.25	120	74	3.2	55.8	24.2336	212.6	3.04	0.81	0.72	2	694.9	7.28	19.11	11.3	1	135.9	0	0	0	0
1	27	0.2	1	1	0	23.44	99	64	5.1	47	25.5959	203.9	4.99	1.13	0.91	3.95	521.84	7.65	21.92	16.9	1	144.811	0	0	0	0
1	28	0	0	0	0	22.95	111	67	3	51	22.66	246.3	4.54	2.11	0.85	2.88	187.1	13.97	22.56	13.6	1	139.05	0	0	0	0
1	29	0.5	1	0	1	20.96	110	70	6.1	58.5	18.22	237.8	4.85	1.81	0.91	3.52	708.259	9.55	16.09	11.2	1	130.506	0	0	0	0
1	30	5	1	0	0	24.22	113	70	5.4	62	27.5342	246.3	3.42	1.12	1.36	1.51	927.76	10.53	18.05	9	1	154.396	0	0	0	0
1	31	1	0	0	0	19.03	110	70	6.8	46	21.75	222.1	3.57	0.33	1.48	1.78	313.36	4.31	12.87	5.3	1	142.049	0	0	0	1
1	32	0.5	0	0	0	29.38	130	85	5.11	69.2	6.84	189.8	4.58	5.63	0.9	2.08	455.977	8.91	19.46	11.8	1	133.305	1	0	0	0
1	32	2	1	0	1	22.95	120	80	5.16	62.2	2.46867	265.1	3.14	0.71	0.97	2.02	614.491	4.24	11.98	6.1	1	151.65	0	0	0	1
1	33	0.1	0	0	1	20.82	124	84	2.25	65.5	8.83	268.5	3.87	7.01	0.79	2.01	624.573	14.22	25.69	11.2	1	141.465	0	0	0	0
1	33	0.5	0	0	0	19.53	110	70	5.9	53	22.66	238.4	4.78	0.8	1.16	2.67	235.24	7.79	16.29	12.1	1	132.146	1	0	0	0
1	33	3	0	0	1	23.24	103	68	5.11	55.9	11.41	217.5	4.23	0.81	0.82	3	611.531	16	24.59	11.3	1	129.284	0	1	0	1
1	34	0.25	0	1	0	25.24	119	76	4.8	46.4	28.5	235.8	7.04	3.59	1.19	4.33	701.064	8.4	22.46	12.1	1	138.593	0	0	0	0
1	34	3	1	0	0	24.03	118	68	6.2	62	5.03	258.8	4.72	5.93	0.8	2.35	205.19	8.61	20.65	6.7	1	150.118	0	0	0	0
1	34	4	1	1	0	27.34	110	70	6.4	76	22.66	243.5	4.05	0.41	1.32	2.11	487.92	6.45	11.16	9.6	1	117.363	0	0	0	0
1	34	5	0	1	0	27.14	190	107	6.3	57	22.66	251.8	5.39	3.12	0.97	3.29	528.01	11.27	16.16	9.3	1	127.355	1	0	0	0
1	35	0.25	1	1	0	26.71	129	78	4.69	58.4	17	268.6	4.82	7.5	0.85	1.93	610.115	5.4	12.19	6.7	1	125.208	0	0	0	0
1	35	0.5	0	0	0	28.26	120	80	3.26	51	4.97	187.7	3.85	0.47	1.14	2.9	618.619	12.94	21.56	12.2	1	132.378	0	0	0	0
1	35	0	0	0	1	22.86	120	70	6.7	66.3	8.28	268.5	5.16	2.23	0.94	3.7	640.602	15.03	28.85	8.5	1	137.459	0	0	0	0
1	36	0.1	0	0	1	24.22	134	80	1.93	32.4	12.03	237.1	4.46	6.38	0.69	2.27	380.359	7.46	18.38	9.4	1	158.396	1	1	0	0
1	36	0.1	0	0	0	22.67	124	84	4.24	61.7	6.2	237.1	4.69	1.94	0.97	2.89	258.712	13.61	23.25	9	1	121.554	0	0	0	0
1	36	0.5	0	0	1	28.4	112	78	6.27	82.8	6.44	180.4	4.65	1.09	1.04	3.4	609.173	12.53	27.37	11.9	1	104.336	0	0	0	0
1	36	3	1	1	0	23.44	122	80	4.07	68.6	4.34	209.1	4.84	0.87	1.33	3.36	465.944	12.1	26.6	12	1	130.983	0	0	0	0
1	36	6	1	1	0	21.34	120	70	4.1	57.5	22.66	253	4.42	1.62	0.96	3.08	469.83	18.77	32.91	8.7	1	125.128	0	0	0	0
1	36	9	0	0	0	27.92	103	71	4.5	74	6.90112	201.7	4	1.22	1.04	2.43	508.58	5.21	11.65	6.6	1	119.517	1	1	0	0
1	37	0.25	0	0	1	32.05	131	80	4.23	65.6	0.450429	258.1	5.47	2.3	0.94	3.74	555.473	8.36	16.44	9.7	1	137.292	0	0	0	0
1	37	1	1	1	0	27.34	110	70	2.6	57	4.05546	127.1	6.45	0.89	1.99	4.68	381.93	12.81	25.56	11.4	1	124.699	0	0	0	0
1	37	4	1	1	1	23.59	144	73	4.95	79.3	22.66	255.2	8.28	3.69	1	6.32	346.707	13.76	31.05	11.6	1	109.159	0	0	0	0
1	37	6	1	1	0	29.41	130	70	5.89	49.5	12.22	207.4	5.44	2.91	1.1	3.43	779.12	14.41	22.69	12.5	1	132.143	1	0	0	0
1	38	0.25	0	0	0	28.52	125	70	4.71	62.7	8.83564	177.3	5.16	3.46	1.07	3.19	358.634	10.86	19.96	11.6	1	143.991	1	0	0	0
1	38	0	0	0	0	20.94	125	88	6.69	62.3	23.9055	246.6	4.57	5.17	0.93	2.02	652.747	13.05	19.33	9.6	1	145.109	0	0	0	0
1	38	3	0	0	1	21.72	110	70	4.08	76.4	4.51	199.6	4.29	1.7	1.12	2.73	731.814	6.42	19.52	8.9	1	113.389	0	0	0	0
1	38	7	0	0	1	22.58	115	80	5.02	46.6	18.55	143	4.41	2	1.16	2.83	645.849	15.17	25.72	16.8	1	134.515	1	0	0	0
1	39	0.1	1	1	0	27.64	135	80	3.8	72.3	1.66	253.5	4.52	3.12	0.92	2.94	557.201	16.84	22.3	14.4	1	120.36	1	0	0	0
1	39	0.6	0	0	0	20.94	107	85	4.89	64.9	4.8	168.3	3.69	1.07	0.87	2.82	675.542	6.22	10.67	7	1	137.144	0	0	0	0
1	39	0	0	0	0	21.51	136	84	5.19	53.4	3.33	227.3	5.63	4.78	1	3.55	865.966	12.64	22.93	11.7	1	126.301	0	0	0	0
1	39	2	1	1	1	25.71	110	62	3.72	64.5	10.34	265.3	4.02	1.8	0.81	3.19	592.234	14.23	18.55	9.7	1	138.173	1	0	0	0
1	39	3	1	0	1	22.03	120	80	5.3	64.6	28.16	259.1	4.73	1.13	1.09	3.47	374.278	8.84	22.83	12.4	1	137.914	0	0	0	0
1	39	8	1	1	0	21.88	126	78	4.4	45.7	13.2007	261.3	5.83	3.5	0.78	3.42	497.58	7.67	22.24	13	1	134.648	1	0	0	0
1	39	8	0	0	0	25	134	91	5.78	50.1	14.8315	169.3	6.25	3.89	1.18	4.45	324.441	12.84	20.73	12.3	1	129.656	1	0	0	0
1	40	1	1	0	1	24.22	113	72	4.33	79.8	3.88	173.5	4.95	1.05	0.93	3.5	621.53	18.3	24.78	13.2	1	106.074	1	0	0	0
1	40	1	0	0	1	31.24	155	80	4.87	55.6	5.93	248.7	5.09	2.26	0.64	3.7	736.852	7.65	15.18	12	1	123.353	1	0	0	0
1	40	2	0	0	0	24.17	136	76	4.7	56	9.72403	266.9	3.3	2.67	0.7	1.84	632.4	15.8	22.92	12.1	1	122.99	0	0	0	0
1	40	2	1	1	0	24.78	119	77	4.83	79.9	4.98	233.3	4.34	1.29	1.01	3.12	592.025	14.25	22.48	9.58	1	105.913	1	0	0	0
1	41	0.1	1	1	0	26.89	125	88	4.08	49.2	13.37	204.7	0.32	1.01	0.91	3.32	642.958	11.98	20.36	13.4	1	128.803	1	0	0	0
1	41	0.1	1	1	1	21.78	156	100	6.1	51.8	13.54	208	5.72	4.01	0.79	3.86	542.723	10.85	18.62	10.8	1	126.106	1	0	0	0
1	41	0.5	1	1	0	22.14	109	69	4.8	69.7	13.1833	248.6	6.36	1.95	1.31	4.87	275.64	7.13	10.56	6.7	1	124.054	0	0	0	0
1	41	0	0	0	0	24.22	122	72	8.74	66	8.8	264	4.05	1.47	0.38	3.13	469.098	9.03	15.99	11.5	1	132.51	1	0	0	0
1	41	2	1	1	0	24.98	113	69	4.3	72	19.9432	235.4	3.78	1.16	1.26	2.1	584.99	5.44	5.85	6.1	1	119.279	0	0	0	0
1	41	2	0	0	1	23.38	174	102	5.32	69.7	4.73	268.9	3.61	2.76	0.97	2.05	594.552	10.9	19.89	11.9	1	124.054	1	0	0	0
1	41	3	0	0	0	24.97	112	75	4.78	64.8	15.44	268	4.21	2.48	0.89	2.85	582.233	9.17	22.77	10.4	1	135.483	1	1	0	0
1	41	5	1	0	1	21.91	132	80	4.27	68.2	6.55	253.4	5.21	0.77	1.2	4.28	828.651	6.32	22.51	13.1	1	127.36	1	0	0	0
1	41	8	1	0	0	27.51	130	80	3.32	62.6	2.65	264.9	3.99	2.45	1.05	2.16	465.628	12.6	20.01	9.6	1	141.26	1	0	0	0
1	42	0.8	1	1	1	22.68	120	75	4.49	60.3	22.66	259.5	4.81	12.06	0.61	1.41	672.221	9.01	19.69	7.8	1	117.642	0	0	0	0
1	42	10	1	1	0	22.48	128	96	4	39.3	16.6782	232	3.5	2.15	0.51	2.53	443.836	5.3	11.69	7.9	1	140.274	0	0	0	0
1	42	2	1	1	0	26.49	120	80	3.79	64.2	23.62	177	4.24	1.21	1.21	2.79	611.442	6.12	12.26	8.3	1	136.056	1	0	0	0
1	42	4	1	1	0	26.84	120	70	4.5	62.1	14.81	267	4.97	1	1.16	3.27	557.94	6.35	11.97	6.3	1	141.638	0	0	0	0
1	42	4	0	1	1	24.14	115	69	4.57	71.1	3.99	248.3	7.75	2.03	1.27	6.17	541.892	13.03	25.08	10.8	1	120.259	1	0	0	0
1	42	6	0	0	0	23.07	127	76	3.2	59	22.66	239	4.8	1.34	1	3.34	240.68	10.61	15.21	10.4	1	118.701	0	0	0	0
1	42	8	1	1	1	23.73	140	90	4.84	71.2	24.5008	223.1	3.73	3.56	0.97	2.05	561.94	15.26	22.65	9.4	1	120.055	0	0	0	0
1	43	0	1	0	0	28.34	112	71	4.44	56	3.84	165.6	2.92	0.72	0.76	1.89	540.677	9.36	19.21	8.7	1	120.425	1	0	0	0
1	43	0	0	0	0	23.03	109	76	6.1	55.1	26.0683	225	3.34	0.85	1.31	1.58	339.89	11.88	24.51	10.3	1	121.23	0	0	0	0
1	43	0	0	1	0	31.25	100	67	3.97	58.7	22.66	203.1	4.48	1.27	1.08	2.4	422.13	10.52	20.48	11	1	118.117	1	0	0	0
1	43	1	0	0	0	22.38	113	69	7.19	63.2	18.37	229	4.58	1.45	1.28	2.96	520.436	5.99	19.35	7.1	1	137.692	0	1	0	0
1	43	2	1	0	0	23.44	124	89	5.32	61.8	5.1	226.9	3.83	1.2	1.22	2.64	632.972	14.86	28.99	11.8	1	115.645	0	0	0	0
1	43	2	0	0	0	21.3	117	78	5.44	54.7	22.52	268.1	4.39	1.21	0.94	3.25	591.044	5.97	14.31	5.6	1	121.593	0	0	0	0
1	43	5	0	0	0	25.2	109	84	5.46	67.3	22.66	151.2	4.09	1.51	4.09	2.43	546.189	4	11.24	6.2	1	127.616	1	0	0	0
1	43	8	1	1	0	20.76	112	80	7.32	63.5	21.3685	226.6	5.79	1.1	1.17	4.04	664.878	8.04	18.26	10.6	1	136.906	0	0	0	0
1	44	1	0	0	0	24.84	130	86	5.78	73.8	23.65	225	3.71	1.25	1.11	1.92	606.76	4.62	11.06	6.4	1	113.356	0	0	0	0
1	44	1	1	1	0	25.39	156	94	5.35	82.4	11.75	216.2	4.78	1.39	1.13	3.25	516.967	5.4	18.95	9.4	1	99.2133	1	0	0	1
1	44	2	0	1	0	21.05	156	97	4.44	67.2	16.4181	253.3	4.05	2.88	1	2.42	683.042	9.54	19.8	8.6	1	126.951	1	0	0	0
1	44	5	1	0	0	24.77	108	70	5.7	60.8	22.66	247.5	5.66	1.07	1.53	3.87	478.613	15.36	30.41	8.2	1	115.608	0	0	0	0
1	44	5	1	0	0	25	112	73	5.41	48.8	7.43	217.9	6.13	6.24	0.85	3.55	547.968	12.48	24.66	11	1	126.541	0	0	0	0
1	44	5	1	1	0	23.63	110	84	6.81	61.8	7.64	257.2	6.12	6.17	1.05	2.67	755.605	14.7	25.27	11	1	114.835	1	0	0	0
1	45	0.25	1	0	0	24.46	78	58	3.37	56.1	22.66	169.1	3.05	1.46	0.54	2.22	360.584	6.52	13.65	11.8	1	118.658	0	0	0	0
1	45	0.25	1	0	0	24.05	92	59	3.5	51	23.5691	186.2	6.22	1.68	1.11	4.03	404.52	16	22.69	9.7	1	123.398	0	0	0	0
1	45	16	0	1	1	25.39	130	77	3.94	59.3	5.62	213.9	4.69	1.4	1.27	3.31	760.511	13.15	25.09	10	1	115.983	1	0	0	0
1	45	3	1	0	0	18.9	130	75	3.83	63.5	4.98	246.9	5.7	2.87	0.88	4.1	590.614	9.06	19.49	9.2	1	134.996	0	0	0	1
1	45	4	0	0	0	20.43	154	94	4.22	61.8	22.66	245.9	4.62	1.19	0.79	3.41	656.85	9.87	20.15	8.4	1	114.031	0	0	0	0
1	45	8	0	0	0	22.04	122	70	5.2	65.5	11.38	228.6	3.69	0.84	1.02	2.35	426.544	9.38	18.89	8.1	1	130.029	1	0	0	0
1	45	8	0	1	0	24.68	124	88	8.48	72.2	22.66	205.2	4.55	1.44	1.08	3.01	364.846	6.96	14.61	7.7	1	115.586	0	0	0	0
1	46	0.1	1	1	1	18.82	122	80	4.47	57.5	11.74	264.9	3.34	1.05	1.01	1.9	394.292	9.76	19.49	10.7	1	116.64	1	0	0	0
1	46	0.4	0	0	0	21.88	130	80	8.39	58.7	17.11	221.8	5.02	1.46	1.03	3.67	691.471	6.84	18.37	7.3	1	115.654	1	0	0	0
1	46	0	0	0	0	22.03	113	72	6.1	70	23.7656	216.4	5.62	1.98	1.43	3.53	362.01	11.07	19.36	12.2	1	119.152	0	0	0	0
1	46	0	1	1	0	24.61	120	85	4.71	48.5	20.6746	224.7	5.78	2.34	1.16	4.05	828.9	10.3	22.54	11.7	1	125.092	1	0	0	0
1	46	1	0	0	0	30.04	150	93	4.48	86.9	4.87	166.7	3.09	1.04	0.67	2.09	612.002	7.65	17.65	7.3	2	91.7381	0	1	0	0
1	46	1	1	1	0	23.42	125	85	5.9	80.1	8.51	231.3	5.14	2.44	0.9	3.39	455.926	5.98	20.43	7.2	1	101.235	1	0	0	0
1	46	1	0	0	0	19.57	112	77	5.5	56.8	3.33	234.1	3.84	2.12	0.86	2.36	597.831	14.61	21.53	10.7	1	117.228	1	0	0	0
1	46	14	1	0	1	24.92	131	64	8.95	89.7	13	252.2	4.83	3.78	0.9	2.75	651.384	5.5	12.28	6.7	2	88.2873	1	1	0	0
1	46	4	0	1	0	20.55	127	92	6.45	58.4	1.3364	229.8	4.75	0.91	1.05	2.8	545.027	11.9	24.11	10.1	1	115.898	1	0	0	1
1	46	4	1	1	0	21.3	109	73	8.4	68	20.6746	191.5	4.27	1.04	1.89	2.33	570.6	17.03	26.72	9.6	1	123.402	0	0	0	0
1	46	4	1	1	1	24.25	120	80	4.56	64.2	26.2585	188.9	6.17	3.2	1.45	4.05	641.757	13.78	21.41	8.8	1	132.286	0	0	0	1
1	46	4	1	0	1	27.55	133	80	3.75	49	8.66	225.4	4.99	4.08	0.82	2.54	490.732	13.62	18.95	10.9	1	124.566	0	0	0	0
1	46	4	1	0	0	30.82	148	88	4.16	52.4	12.25	266.8	5.79	3.19	0.8	4.2	656.305	4.31	9.32	7.2	1	121.178	1	0	0	0
1	46	5	0	0	0	20.57	126	61	4.7	46	0.383999	191.8	4.95	1.18	1.26	2.96	444.51	10.96	19.3	8.9	1	127.843	0	0	0	0
1	47	0.1	1	1	1	24.01	102	63	3.5	59.1	21.75	224.3	5.7	2.35	0.85	3.97	420.078	12.65	25.45	9.9	1	114.524	1	0	0	0
1	47	0.25	0	1	0	23.42	120	80	4.3	71	17.85	221.3	6.82	1.71	1.15	5.05	710.835	17.01	31.77	15.3	1	116.306	0	0	0	0
1	47	0	1	0	0	23.34	129	85	3.9	63.8	0.490007	198.6	4.95	1.32	0.95	3.69	612.11	7.83	17.34	11.5	1	132.357	1	0	0	0
1	47	1	1	0	0	24.69	104	64	6.83	53	22.66	163.1	5.28	1.17	1.28	3.66	414.803	5.19	13.63	6.7	1	119.768	0	0	0	0
1	47	10	1	0	0	19.53	155	95	5.1	54	22.66	202.6	5.77	5.59	0.85	2.53	414.98	10.05	18.39	11.3	1	118.852	0	0	0	0
1	47	11	0	1	0	29.3	130	75	5.76	54.9	6.57321	236.5	4.69	2.29	1.12	3.24	493.082	5.88	11.05	6.5	1	118.047	1	0	0	0
1	47	13	0	1	0	25.95	150	100	3.86	53.5	8.18	189.3	4.95	3.85	0.87	2.97	783.217	14.77	23.18	10.8	1	119.307	1	1	0	0
1	47	2	1	1	1	22.6	120	80	3.51	68.1	12	262.3	6.56	8.35	0.9	2.37	518.467	10.53	27.51	9.9	1	122.32	0	0	0	0
1	47	3	1	0	0	24.34	115	68	7.37	70.3	4.73	249.7	4.37	0.99	1.41	2.56	592.32	5.07	13.95	9.2	1	117.708	0	0	0	1
1	47	5	0	0	0	24.79	139	70	5.97	60.3	3.99	261.2	3.36	1.78	0.86	2.35	523.032	10.15	17.64	9	1	113.582	1	0	0	1
1	47	7	1	1	0	31.22	125	87	6.39	72.6	4.79	188.2	5.04	1.61	1.13	3.14	619.715	11.46	19.91	7.6	1	113.214	1	0	0	0
1	48	0.1	1	1	0	23.8	139	90	7.69	71.2	6.36	265.4	4.69	0.72	0.98	3.75	494.491	12.75	27.77	11.1	1	115.1	0	0	0	0
1	48	0.1	1	0	0	22.94	123	86	4.85	61.6	22.66	267.8	3.47	1.24	0.85	2.64	425.729	5.76	12.63	6.9	1	111.802	1	0	0	0
1	48	0.4	0	0	1	24.54	120	70	5.81	44.6	16.9268	140.5	4.8	1.68	1.3	2.97	520.31	9.8	21.23	11.1	1	127.671	0	0	0	0
1	48	0	0	0	0	22.14	154	84	5.65	69	3.12	210	4.87	2.17	1.05	2.86	499.106	15.64	30.69	11.2	1	119.551	1	0	0	0
1	48	10	1	0	0	19.38	107	68	4	57	6.30741	247.8	5.83	1.07	1.09	4.31	447.6	16.32	27.18	11.7	1	115.426	0	1	0	1
1	48	10	1	0	0	29.76	123	82	8.7	92	6.18	251	6.43	1.88	1.01	4.68	341.45	12.29	20.68	8.7	1	84.4313	0	0	0	0
1	48	3	0	0	0	24.24	120	80	4.23	96.1	19.92	241.6	5.15	0.88	1.53	3.61	564.314	9.24	26.3	9.6	2	80.0959	0	0	0	0
1	48	5	1	1	1	25.12	139	81	3.7	51	6.25	191.3	4.37	0.7	1.2	3.07	578	8.17	14.07	11.4	1	120.825	1	0	0	0
1	48	7	0	0	1	22.14	124	65	4.67	81.2	5.52	257.3	3.4	0.59	1.14	2.28	620.261	5.28	5.42	4.7	1	98.1906	0	0	0	1
1	48	8	1	0	1	23.44	120	70	7.41	56.9	8.50419	189.7	4.45	1.15	1.2	2.9	351.924	9.65	22.67	7.9	1	115.509	0	0	0	0
1	49	0	1	0	0	24.03	156	100	4.63	70.1	4.93	169.4	5.01	1.5	1.03	3.45	501.072	16.45	21.26	12.2	1	116.466	0	0	0	0
1	49	0	1	0	1	26.22	110	80	4.37	66	6.63	239.7	6.91	4.5	1	4.65	507.332	8.1	20.87	10.4	1	125.269	1	0	0	0
1	49	4	0	0	0	25	107	71	4.91	61.3	22.66	238.4	6.48	1.22	1.27	3.87	674.01	15.49	25.39	11.7	1	111.243	0	1	0	0
1	49	5	0	0	0	24.77	110	70	4.59	72.6	3.59	249.4	5.34	2.3	1.16	2.59	687.528	9.74	14.9	9	1	111.635	0	0	0	0
1	49	8	1	0	0	23.92	124	67	4.73	67.6	8.51	258.1	3.8	1.53	0.89	2.58	611.636	12.68	19.58	11.2	1	121.693	0	0	0	0
1	50	0.4	0	1	0	23.44	139	81	3.53	60.4	22.66	187.6	4.71	2.14	0.8	3.59	772.278	11.91	16.64	9.6	1	111.138	0	0	0	0
1	50	0	0	1	0	24.97	130	75	5.5	74	12.1563	247.6	5.1	3.34	0.78	2.84	297.78	6.53	12.18	6.9	1	108.323	0	0	0	0
1	50	10	1	0	0	25.2	168	83	4.14	66.9	26.13	250.6	4.3	2.18	0.81	2.77	664.022	12.66	22.45	13.1	1	122.372	0	0	0	0
1	50	10	1	0	0	18.59	120	80	6.99	90.5	23.62	241	5.29	4.6	0.86	3.02	768.703	4.71	13.62	7.7	2	84.9246	1	0	0	0
1	50	11	1	0	0	21.48	93	63	3.6	68.3	22.66	177.1	3.61	1.5	1.25	1.67	312.64	13.14	25.97	10	1	119.346	1	0	0	1
1	50	12	1	1	0	17.97	136	92	3.9	74	24.4754	238	4.69	0.55	1.37	2.61	389.46	13.95	24.72	11.6	1	108.323	0	1	0	0
1	50	15	0	0	1	21.48	135	80	6.83	72.9	4.56	238.2	5.14	1.75	1.1	3.74	537.852	14.94	24.77	11	1	110.302	0	0	0	0
1	50	2	1	1	0	23.51	152	89	5.37	64.2	22.66	258	4.15	1.47	1.33	2.4	636.868	4.95	11.36	5.5	1	128.621	1	0	0	0
1	50	20	0	0	1	23.62	110	66	8	61.4	3.86	252.2	3.92	1.71	1.01	2.59	545.521	11.38	22.92	10.9	1	110.39	0	0	0	0
1	50	4	1	1	1	23.88	114	65	4.37	50.9	6.75	227.3	5.38	1.33	1.06	4.07	515.547	11.8	23.44	10.3	1	119.236	0	0	0	0
1	50	5	1	0	0	27.1	120	85	6.64	57.8	22.66	189.9	6.78	2.23	1.08	4.54	461.656	12.14	21.65	11.1	1	113.166	1	0	0	0
1	50	5	1	1	1	22.72	144	105	6.43	58.8	9.58	248.4	4.92	3.91	0.92	2.99	407.891	10.6	20.14	8.4	1	112.371	1	0	0	0
1	50	6	0	0	0	25.63	120	85	8.2	105	2.82578	264.2	4.27	1.82	0.86	2.44	307.42	4.75	10.83	5.7	1	70.9584	1	1	0	0
1	50	7	1	0	0	27.47	119	72	5.94	79.4	18.5607	267.9	4.41	1.06	1.07	2.59	442.735	10.08	13.34	9.7	1	99.4806	0	0	0	0
1	50	7	1	1	0	26.71	115	65	4.5	45	23.0252	222.8	6.52	2.21	0.86	4.25	1183.18	18.82	29.48	12.8	1	125.429	0	0	0	0
1	50	8	1	0	0	30.47	130	85	3.61	62	9.75	254.7	4.39	0.73	1.27	2.64	810.754	9.21	16.9	6.7	1	134.159	0	0	0	0
1	50	8	1	0	0	29.65	104	60	7.3	67.4	9.35364	178.4	4.73	0.52	0.92	3.43	528.894	11.31	20.96	9.8	1	121.275	0	0	0	0
1	51	0.5	1	0	0	26.01	111	64	7.6	76.3	17.4	264.9	5.06	1.02	1.27	3.36	453.801	12.06	22.89	9.4	1	103.657	0	0	0	0
1	51	1	0	0	0	21.78	158	90	6.5	83.4	7.82	240.1	6.36	1.4	1.01	4.8	410.801	6.81	19.46	11.1	1	93.0853	0	0	0	0
1	51	1	0	0	0	19.03	113	67	5.07	76.7	22.66	216.2	4.76	1.19	1.18	3.21	729.772	12.28	25.52	10.7	1	103.004	1	0	0	0
1	51	10	0	0	0	20.81	119	76	4.3	47.2	6.65	192.5	3.93	1.02	1.14	2.56	496.174	9.2	16.41	7.1	1	122.131	0	0	0	0
1	51	10	0	0	0	22.03	149	91	6.46	62.7	15.18	247.7	5.08	3.62	0.95	3.05	654.166	6.38	12.92	8.1	1	131.424	1	0	0	0
1	51	16	0	0	0	26.93	130	80	12.63	166.2	152.5	266	5.15	3.52	0.78	3.38	707.83	20.39	33.63	14.8	3	40.4416	0	0	1	0
1	51	2	1	1	0	17.48	95	62	5.04	68.4	3.19	196.4	3.28	0.33	1	2.34	601.294	10.56	20.82	9.2	1	118.301	0	0	0	0
1	51	2	0	0	0	28.73	130	81	4.88	46.2	8.02	258.1	5.63	4.98	0.87	3.65	699.387	9.02	16.07	9.3	1	123.211	1	0	0	0
1	51	2	1	1	0	25.24	134	89	4.85	93.5	9.73	268.5	5.94	2.32	0.93	4.68	371.74	7.78	21.11	9.7	2	81.0699	1	0	0	0
1	51	3	0	0	0	21.48	120	70	5.83	86.5	2.47	235.6	6.18	2.64	1.12	4.41	640.542	9.09	20.27	8	2	89.0673	1	0	0	0
1	51	3	1	0	1	22.15	114	78	5.61	54.9	10.69	248.6	4.61	4.77	0.72	2.57	487.958	15.03	24.99	12	1	114.776	0	0	0	0
1	51	3	1	0	0	24.91	125	96	5.55	46.4	11.47	188.2	3.08	0.79	1.14	1.22	305.81	11.99	19.78	10.4	1	122.992	0	1	0	0
1	51	3	1	0	0	30.36	140	90	5.12	66.7	5.47	249.8	3.64	2.07	0.96	2.25	531.757	5.77	17.56	7.8	1	121.956	1	0	0	0
1	51	3	1	0	0	34.22	130	90	4.33	81.9	6.7	238.3	4.19	3.53	0.85	1.73	675.259	8.74	18.41	8.5	1	95.1504	0	0	0	0
1	51	5	1	1	0	27.82	102	62	5	52	7.18	241	6.53	1.07	0.95	4.74	231.17	8.07	15.13	8	1	117.365	0	0	0	0
1	51	5	0	0	0	34.93	106	77	3.56	71.4	22.66	201.3	4.73	0.52	1.16	3.34	477.427	7.47	14.48	8.5	1	112.318	0	0	0	0
1	51	5	0	0	0	26.29	128	75	5.6	77.2	2.03	252.5	3.83	0.72	0.98	2.64	825.845	4.04	7.87	6	1	102.198	0	0	0	0
1	51	5	0	0	0	23.56	130	80	4.89	54.2	1.79	254.9	4.85	3.63	0.99	2.6	600.92	10.79	19.95	8.1	1	115.383	0	0	0	0
1	51	7	0	0	0	24.03	115	83	5.26	55.1	7.74	188.5	3.86	1.21	0.91	2.44	632.168	3.78	13.64	7.2	1	114.605	1	0	0	0
1	51	7	1	1	1	26.73	142	95	7.63	78.2	19.05	226	6.39	1.27	1.1	4.37	358.061	15.5	23.97	11.7	1	100.62	0	0	0	0
1	51	8	1	1	0	24.84	116	74	5.9	45.2	1.2	133.9	3.6	1.14	1.03	2.34	567.204	16.01	26.97	7.5	1	124.324	0	0	0	0
1	51	8	0	0	0	22.14	120	70	4.91	52.5	22.66	261.3	4.42	1.13	0.91	3.34	426.168	11.78	20.48	8.8	1	116.904	1	0	0	0
1	51	9	0	0	0	23.12	119	86	6.57	67.1	9.72	255.6	9.15	29.11	0.89	1.55	415.958	11.89	21.81	8.8	1	121.077	0	0	0	0
1	52	0.25	1	1	0	26.11	120	70	4.5	69.8	4.22	98.3	2.87	0.24	0.86	1.74	677.301	5.72	12.19	8.9	1	114.63	1	0	0	0
1	52	0.25	0	1	1	24.61	120	78	3.85	69.9	4.48	227.1	4.43	1.05	1.21	2.98	587.629	10.16	22.12	11.6	1	114.432	0	0	0	0
1	52	10	1	0	0	24.88	138	83	3.3	40.4	8.2758	250.9	5.04	0.83	1.39	3.32	403.542	6.97	18.23	9.6	1	129.283	0	0	0	0
1	52	10	1	1	0	20.08	190	90	4.31	55.9	12.3	140	4.72	2.19	1.39	2.65	719.112	8.41	18.34	8.2	1	113.13	0	0	0	0
1	52	10	0	0	0	24.03	111	65	3.8	54	10.6156	263.8	4.11	1.23	1.1	2.45	558.14	6.52	9.62	6	1	114.75	1	0	0	0
1	52	13	0	1	0	22.43	155	85	5.5	72	29.6709	244.6	5.24	2.85	1.3	3.13	606.58	10.95	18.43	8.5	1	110.409	0	0	0	0
1	52	14	1	0	1	18.65	132	83	3.59	53.9	11.01	155.3	5.61	1.58	0.96	3.9	378.959	7.04	16.63	11.3	1	114.837	0	0	0	0
1	52	2	0	0	0	21.88	114	78	3.99	55.4	15.62	146.2	2.7	0.74	0.89	1.55	387.095	3.37	16.13	7.2	1	113.549	1	0	0	1
1	52	2	1	1	0	23.5	110	80	9	47.1	3.99	189.5	4.14	1.35	1.04	2.69	392.424	14.82	30.76	12.1	1	121.382	0	0	0	1
1	52	2	0	0	0	23.44	130	92	3.37	59.7	4.93	192.9	3.11	1.45	0.52	2.53	481.937	7.15	14.03	10.8	1	110.113	0	0	0	0
1	52	5	1	0	1	20.7	130	82	4.76	62	13.2732	236	5.24	1.89	1.31	3.55	454.24	15.01	27.49	11.3	1	132.287	0	0	0	0
1	52	5	1	0	0	23.14	125	90	6.89	45.4	26.28	205.5	3.33	0.82	1.6	1.12	968.478	10.16	20.34	9.6	1	123.23	0	0	0	0
1	52	6	1	1	0	21.72	135	70	5.82	68.1	19.7374	181.7	6.02	8.27	0.92	2.93	373.169	7.16	14.54	7.2	1	118.099	0	0	0	0
1	52	6	1	0	0	26.71	102	72	5.3	51	10.742	244.3	4.91	1.44	0.89	3.36	1173.32	17.03	24.45	11.7	1	117.477	0	0	0	0
1	53	0.25	1	0	0	25.15	130	80	6.4	71	22.66	256.3	5.04	1.84	1.12	3.69	491.595	10.96	19.41	10.2	1	111.506	0	0	0	0
1	53	0.5	0	0	0	23.34	136	84	6.1	78.7	13.1107	255	5.74	1.77	1.05	3.4	372.16	8.52	20.27	8.7	1	98.4546	0	0	0	0
1	53	0	0	0	0	25.15	138	95	4.6	74	10.2453	244.8	4.59	1.27	0.8	3.3	375.6	14.43	24.6	12.8	1	106.064	0	0	0	0
1	53	10	1	1	0	28.08	132	77	8.38	125	26.8831	66.8	5.54	1.12	1.46	3.21	571.22	17	24.4	12	1	107.866	0	0	0	0
1	53	10	1	1	0	21.5	112	75	7.7	64.2	7.54802	266.3	5.17	2.97	0.89	3.2	447.54	11.54	22.68	11.8	1	125.939	0	0	0	0
1	53	10	0	1	0	20.57	135	85	4.96	88.8	3.1	236.6	5.56	0.91	1.5	3.43	342.246	8.74	20.34	7.5	2	85.0821	0	1	0	0
1	53	10	0	0	0	23.44	115	77	4.4	73	21.75	245.9	4.34	1.9	0.83	2.75	513.12	11.67	18	9.3	1	107.823	0	0	0	0
1	53	10	0	0	0	23.05	122	75	5.71	55.9	8.78	254.8	4.81	0.96	0.97	3.52	377.398	13.76	26.32	10.1	1	112.338	1	1	0	0
1	53	12	1	1	0	25.82	135	86	5.2	68.7	22.66	223.1	7.47	2.79	1.75	4.68	861.23	17.68	26.3	9.2	1	116.035	0	0	0	1
1	53	3	0	0	0	24.77	124	78	4.7	67	15.7	219.5	4.49	1.94	0.67	3.09	361.744	10.36	17.95	12.5	1	119.604	0	0	0	0
1	53	3	1	1	1	21.34	147	89	6.03	52.8	5.6	205.9	3.57	1.46	0.85	2.36	255.593	5.37	13.21	8.2	1	115.004	0	0	0	0
1	53	4	1	0	0	25.1	115	64	4.12	59.1	8.9	169.6	4.16	1.07	1.29	2.3	339.883	15.19	25.15	12.3	1	109.797	0	0	0	0
1	53	4	0	0	0	23.05	140	90	5.61	91.2	13.4748	266.4	5.8	7.82	0.92	1.72	673.752	4.61	9.63	6.4	2	82.3826	1	0	0	0
1	53	6	1	1	0	24.77	138	90	4.37	71.1	2.86	199.2	3.73	8.03	0.97	2.12	335.568	6.24	12.89	6.3	1	111.316	1	0	0	0
1	53	8	1	1	0	22.89	132	75	4.23	64.1	4.16764	235.2	6.86	1.77	1.39	4.82	857.288	7.97	18.65	8.3	1	126.176	0	0	0	0
1	54	0.1	0	1	0	20.55	130	80	5.19	61.8	3.98	243.1	5.31	1.53	0.69	4.27	450.485	4.67	12.08	9.6	1	107.045	0	0	0	0
1	54	0.1	1	1	0	26.4	135	85	3.26	70.7	17.87	168.4	4.96	2.56	0.91	3.44	496.014	15.66	23.46	11.9	1	111.294	0	0	0	0
1	54	0.4	0	0	0	27.63	119	70	4.2	71.9	17.61	264.5	4.37	3.44	0.96	2.75	667.972	4.36	6.96	6	1	109.052	1	0	0	0
1	54	0.5	0	0	1	21.3	128	76	3.62	59.6	14.09	242.8	5.59	1.58	0.76	3.55	614.6	7.46	13.66	7.6	1	108.652	0	0	0	0
1	54	0	1	0	0	21.08	120	74	3.48	64.5	22.66	242.3	4.73	2.11	0.81	3.3	241.715	5.75	20.44	12.3	1	124.354	0	0	0	0
1	54	1	1	0	1	29.17	170	87	5.51	68.4	9.58	181.9	3.82	1.38	0.83	2.63	474.02	13.65	22.91	11.2	1	115.834	0	0	0	1
1	54	10	0	0	0	24.22	131	73	4.79	51.1	9.11	212.4	4.25	0.81	0.98	3.09	491.398	7.94	20.88	7.7	1	115.745	0	0	0	0
1	54	11	1	1	0	25.39	133	73	4.75	53.6	4.5729	262.2	5	2.07	0.83	3.83	395.592	8.78	17.63	11.1	1	113.495	0	0	0	0
1	54	12	1	0	0	22.66	126	67	5.4	58.3	22.66	233.2	3.65	0.98	0.81	2.44	220.67	12.06	20.21	9	1	109.641	0	1	0	1
1	54	2	1	0	0	21.48	116	84	5.25	66.6	14.72	196.7	4.74	1.74	0.93	3.29	428.145	14.35	29.13	11.4	1	119.629	0	0	0	0
1	54	3	1	0	1	22.68	100	70	3.94	72.4	6.64612	170.2	3.54	1.08	1.14	1.6	428.738	4.26	15.83	12.7	1	108.142	0	0	0	0
1	54	3	0	1	1	24.09	130	70	4.57	61.5	22.66	257.8	4.43	2.15	0.74	2.99	171.783	12.42	19.12	9.1	1	107.26	1	0	0	0
1	54	4	1	0	0	19.78	132	84	5.2	57.4	17.79	241.4	5.07	1.41	0.83	3.52	345.7	11.57	22.53	10.2	1	110.345	0	0	0	0
1	54	5	1	1	0	29.09	130	80	5.31	67.4	3.28	189.5	4.43	0.8	1.2	3.31	383.686	6	17.85	7	1	117.915	0	0	0	0
1	54	5	1	1	1	30.82	113	71	8.25	72.3	21.8007	261	4.48	0.88	1.17	2.91	548.173	8.37	19.29	9.6	1	108.323	0	0	0	0
1	54	5	0	0	0	29.73	149	89	5.3	77	3.47	217.2	3.21	1.77	1.28	1.29	686.52	10.86	27.42	8.1	1	100.381	0	0	0	0
1	54	7	1	1	0	23.05	131	72	5.08	76.6	24.8442	254.5	3.52	1.32	0.88	2.31	499.055	6.85	12.48	8.4	1	101.015	0	0	0	0
1	54	7	1	1	0	22.04	110	70	5.4	54	22.66	223.5	1.7	1.12	0.75	0.63	463.74	8.54	15.7	8.1	1	113.149	1	0	0	0
1	55	0.5	1	1	0	17.31	120	80	3.3	76	17.08	268.9	5.91	1.43	0.98	4.57	322.383	7.93	19.94	9	1	101.266	1	0	0	0
1	55	0	0	1	0	23.01	116	81	4.01	72.8	21.2834	222.4	4.21	1.69	1.07	2.58	339.743	11.65	25.83	9.1	1	106.672	0	0	0	0
1	55	0	0	0	0	25.97	123	71	5.1	59	22.66	233.4	5.42	1.95	1.15	3.43	837.59	10.43	18.54	9.9	1	108.341	1	0	0	0
1	55	1	0	0	0	27.55	132	69	5.91	82.6	2.74	257.9	4.91	0.73	1.75	2.89	608.674	21.01	30.27	7.3	2	91.567	0	0	0	1
1	55	1	1	1	0	25.78	120	84	8.15	100.9	9.04	207.1	5.1	0.94	0.89	2.11	569.967	2.75	10.51	5.8	2	71.8891	0	0	0	0
1	55	1	1	0	1	22.6	144	71	4.47	72.7	2.97	260.1	3.56	1.07	0.87	2.31	617.23	7.84	12.86	8.3	1	106.85	1	0	0	0
1	55	13	0	0	0	21.36	138	88	7.3	70	8.83564	186.5	3.87	0.72	1.37	2.18	521.48	11.43	22.47	8.5	1	111.852	0	0	0	0
1	55	4	0	1	0	20.7	188	104	4.8	59	16.8997	235.5	4.44	1.15	1.55	2.18	356.95	11.81	21.68	24.01	1	108.341	0	0	0	0
1	55	5	1	0	1	22.6	130	80	3.26	43.9	11.63	260.8	3.51	1.3	0.85	2.45	439.371	4.47	14.7	7	1	122.338	0	0	0	0
1	55	5	0	0	0	22.83	120	87	7.83	75.1	3.5	223.9	5.98	2.04	1	3.97	396.287	6.57	13.85	6.6	1	102.735	1	0	0	0
1	55	5	1	1	0	19.53	150	110	5.51	51.5	14.2149	205.6	4.28	3.44	0.97	1.86	740.812	12.91	21.63	10.5	1	114.567	0	0	0	0
1	55	6	1	1	1	29.38	130	90	6.75	65.2	2.46	263.8	7.73	8.91	1.1	4.64	365.448	15.47	21.48	10.9	1	121.883	1	0	0	0
1	55	7	0	0	0	20.89	152	76	2.64	61.5	6.18	164.2	3.28	0.78	0.85	2	515.308	5.54	15.27	8.9	1	106.509	0	0	0	0
1	56	0.4	1	1	0	23.81	155	86	4.5	64.2	19.56	260.4	5.44	1.56	0.92	3.94	520.378	7.03	15.67	8.1	1	123.313	1	0	0	0
1	56	0.6	1	1	0	28.89	128	72	5.4	56.2	5.41	249.3	4.2	0.93	1.14	2.72	368.08	11.29	23.48	12.2	1	109.754	1	0	0	0
1	56	0	1	1	0	25.64	148	84	3.51	51.7	8.3	184.2	4.33	1.23	1.2	2.75	604.961	16.6	20.67	10.5	1	113.584	0	0	0	0
1	56	0	1	0	0	24.44	126	85	6.44	88	4.67652	202.5	5.15	1.87	0.89	3.01	335.607	6.02	15.17	9	2	84.2243	1	0	0	0
1	56	1	1	0	1	20.08	124	70	3.9	75	14.8832	198.7	4.83	1.06	1.11	3.48	472.406	9.66	21.15	13.5	1	102.18	0	0	0	0
1	56	1	1	1	0	20.31	143	90	2.56	60.4	23.2	258.8	5.01	3.62	0.9	2.43	297.497	5.12	13.38	6.8	1	106.551	1	0	0	0
1	56	10	1	0	0	22.1	135	80	5.41	62.8	3.61	209.4	7.87	9.82	0.83	2	432.833	13.38	28.13	11	1	126.644	1	0	0	0
1	56	10	0	1	0	22.32	98	60	6.33	87.6	21.1566	207.7	3.26	1.35	0.96	2.12	385.621	7.86	14.66	7.2	1	84.6895	1	0	0	0
1	56	16	1	0	0	28.58	127	72	5.1	61	23.12	246.2	3.91	0.96	1.08	2.76	389.31	14.59	27.05	10.4	1	106.119	0	0	0	0
1	56	20	1	1	0	22.68	126	70	3.56	61	8.01	229.5	5.61	4.9	0.87	2.84	573.77	5.67	17.95	8.2	1	106.119	1	0	0	0
1	56	3	1	1	0	20.89	116	67	5.56	87.1	25	126.8	3.75	1.34	0.94	2.35	631.445	17.93	28.04	11.6	2	85.2776	0	0	0	0
1	56	5	1	1	0	21.56	143	78	8.14	78.1	9.6	148.5	5.26	3.21	1.34	3.51	864.368	9.32	18.93	9.6	1	97.2976	1	0	0	1
1	56	5	1	1	1	23.6	153	84	4.21	52	20.3	243.3	5.54	1.66	1.18	3.78	236.765	10.62	22.08	9.5	1	113.314	0	1	0	0
1	56	6	0	0	0	26.17	116	72	6.39	57.5	25.0723	175	4.85	1.27	1.31	3.14	469.721	15.67	26.58	10.6	1	108.727	0	0	0	0
1	56	7	1	0	1	27.69	101	63	6.38	52.7	6.8	130.2	4.89	4.16	0.89	2.99	392.786	11.09	18.29	12.2	1	112.693	0	0	0	0
1	56	9	1	1	0	30.38	120	75	4.07	64.9	22.66	218.2	3.98	1.06	1.19	2.15	508.986	13.18	25.03	11.6	1	121.706	0	0	0	0
1	56	9	1	1	0	20.83	132	66	4.55	59.8	22.66	208.2	4.81	1.58	0.9	3.64	483.966	8.34	16.89	7.4	1	106.989	0	0	0	1
1	56	9	1	1	0	23.11	132	75	4.22	65.6	3.52	257.5	3.06	0.69	1.1	1.56	628.106	2.6	18.27	11.9	1	120.138	0	0	0	1
1	57	0.1	0	0	0	19.17	128	90	3.06	72.4	23.2	214.1	5.04	3.92	1	2.68	485.677	6.83	20.28	11	1	105.887	1	0	0	0
1	57	0	1	0	0	20.44	130	70	6.33	62.4	12.9	212.7	4.07	1	1.17	2.53	210.355	9.93	16.92	11	1	126.733	1	0	0	0
1	57	10	0	0	0	24.14	128	79	6.22	46.3	5.15	266.9	4.53	2.05	1.2	2.42	391.117	12.19	22.99	11.8	1	118.021	1	0	0	0
1	57	13	1	1	0	20.03	145	90	4.95	60	16.8089	189.7	4.9	0.68	1.11	3.47	405.445	8.27	21.01	7.5	1	106.094	0	0	0	0
1	57	2	0	0	0	22.6	115	61	5.62	62.8	3.53	222.6	4.78	1.32	0.9	3.48	313.22	5.57	15.56	6.3	1	125.757	0	0	0	0
1	57	3	1	1	1	18.49	132	76	3.77	69.4	12.6341	162.5	5.13	1.01	1.26	3.4	728.407	11.31	19	8.9	1	111.446	0	0	0	0
1	57	4	1	1	0	21.23	153	82	4.69	71.1	11.33	254.1	4.89	4.13	1.1	2.93	524.827	6.6	12.99	6.9	1	108.232	0	0	0	0
1	57	5	1	0	0	23.83	150	75	5.81	65.8	21.75	222.1	7	2.44	1.07	5.17	747.593	5.67	19.9	9.5	1	118.859	1	0	0	0
1	57	5	1	1	0	21.05	131	78	4.3	79	22.66	256.8	3.62	1.41	1.16	1.8	387.04	9.78	21.72	9	1	95.2873	0	0	0	0
1	57	5	1	1	0	20.43	129	86	4.76	79.3	4.16	144.8	3.61	1.43	0.58	2.84	460.337	8.85	20.69	10.5	1	94.8517	0	0	0	0
1	57	6	1	0	1	25.33	158	80	4.11	61.4	18.02	256.4	4.27	1.24	1.11	2.43	532.431	9.13	17.96	7.9	1	105.093	0	1	0	0
1	58	0.6	0	0	0	21.48	128	70	4.9	60.5	26.7646	230.4	3.9	0.59	1.12	2.48	640.115	4.11	11.66	5.8	1	104.993	0	0	0	0
1	58	1	0	0	0	23.23	129	93	5.37	67.1	22.66	230.9	3.89	1.01	1.03	2.65	532.534	11.49	20.73	12.1	1	115.268	0	0	0	0
1	58	1	0	0	0	18.67	140	100	5.2	75	2.67	244.4	5.34	0.77	1.86	3.04	632.04	12.16	27.41	11.4	1	100.755	1	0	0	0
1	58	1	0	0	0	26.31	140	79	3.64	46.9	3.13916	192.4	3.69	0.78	1.09	2.23	586.977	5.7	13.65	9.7	1	116.576	0	0	0	0
1	58	10	0	0	1	23.26	116	70	7.36	48.9	20.48	215.9	4.62	2.47	1.08	2.47	498.759	9.3	21.97	9.1	1	114.592	0	0	0	0
1	58	10	0	0	0	29.74	113	71	7.06	67.9	10.03	233.7	3.66	1.99	0.94	2.05	478.212	13.63	25.23	11.8	1	113.628	1	0	0	0
1	58	14	1	1	1	31.04	120	66	5.89	61.7	20.8722	183.9	4.83	0.86	1.01	3.59	746.727	8.63	18.61	7.9	1	104.149	0	0	0	0
1	58	3	0	0	0	34.17	138	95	5.3	54.5	18.02	210.3	4.99	0.82	1.03	3.47	527.32	7.82	18.29	10.8	1	109.598	0	0	0	1
1	58	4	1	0	0	17.58	98	52	6.3	42.1	16.7674	194.2	4.99	2.71	0.81	2.96	437.239	9.86	22.59	9.3	1	121.866	1	0	0	0
1	58	4	1	1	0	22.58	107	62	6.8	72	27.4661	262.9	5.28	1.42	1.08	3.55	275.97	10.26	18.21	7.9	1	105.852	0	0	0	0
1	58	5	1	1	0	25.39	131	71	6.26	95.1	5.15	237.4	3.12	1.81	0.97	1.75	336.105	10.61	20.31	8.8	2	75.6128	0	0	0	0
1	58	5	1	1	0	24.17	102	70	4.4	72.5	22.66	228.2	5.25	1.42	1.29	3.1	365.19	11.05	27.75	12.4	1	104.97	1	0	0	0
1	58	5	0	0	0	19.81	106	62	5.55	64.3	15.75	179.8	5.33	6.83	0.78	1.68	762.824	5.8	12.45	6.9	1	121.364	1	0	0	0
1	58	6	1	0	0	26.49	138	95	3.7	61.6	22.66	190.1	5.34	1.32	0.84	4.24	581.16	9.01	19.76	6.9	1	104.218	0	0	0	0
1	58	9	1	0	0	21.37	133	80	4.74	63.5	18.0477	239.8	3.85	1.23	0.86	2.76	441.645	7.26	21.59	12	1	123.215	0	0	0	0
1	58	9	1	1	0	21.64	130	81	10	70.7	2.9	164.5	4.73	0.68	1.09	3.18	406.436	5.95	14.84	7.1	1	108.21	1	0	0	0
1	59	0.1	0	0	0	21.48	135	70	4.6	71.1	22.9218	176.8	4.53	1.27	0.82	3.63	441.207	9.4	24.26	15.2	1	106.722	1	0	0	0
1	59	0.1	1	0	1	28.4	122	83	6.33	81	8.6	260.9	4.54	2.2	0.92	3.03	1009.49	11.2	24.38	13.8	1	91.1604	1	0	0	0
1	59	0.25	0	0	0	23.83	130	70	6.52	63.8	5.23	179.7	4.98	0.71	0.89	3.88	496.255	10.68	25.93	12.8	1	121.657	0	0	0	0
1	59	0.25	0	0	0	29.73	130	73	4.3	80.2	29.6023	257.3	4.51	1.25	1.04	2.43	380.564	3.74	8.06	5.7	1	92.261	0	0	0	0
1	59	0.5	1	0	1	21.88	120	80	5.54	69.4	7.94	172.3	2.84	2.19	1.03	1.58	640.457	6.74	7.03	6	1	109.891	0	0	0	0
1	59	0.5	0	0	0	22.03	140	90	7.46	65.1	22.66	211.5	5.05	1.23	1.38	3.54	536.024	5.78	10.81	7.1	1	118.726	1	0	0	0
1	59	1	0	1	0	22.86	141	87	4.39	72.2	8.19	266.1	4.19	1.99	0.89	2.29	500.886	6.67	13.93	9.3	1	104.759	1	0	0	0
1	59	1	1	1	0	19.22	126	75	5.89	68.6	6.05	194	3.41	1.08	0.79	2.65	582.619	6.84	14.68	7.9	1	111.442	1	0	0	0
1	59	2	1	0	0	26.72	130	75	4.96	56.2	13.84	257.9	4.68	1.99	0.77	3.34	580.026	8.48	20.16	10.7	1	107.465	1	0	0	0
1	59	20	1	1	0	27.69	109	66	4.6	70	26.866	246.4	4.87	1.47	1.36	2.82	322.14	12.47	25.55	10.3	1	108.753	0	0	0	0
1	59	20	1	1	0	23.88	133	70	5	75.1	21.52	155.3	4.45	2.17	0.91	3	542.849	8.7	16.77	10	1	99.8886	0	0	0	0
1	59	5	0	0	0	23.71	122	71	7.01	71.4	4.33229	237	3.95	0.96	1	2.48	230.266	4.54	12.78	5.8	1	106.18	0	0	0	0
1	59	5	0	0	0	20.55	125	87	5.74	71.7	3.54	201	4.37	1.98	1.08	2.38	456.009	14.45	28.4	13.1	1	105.643	0	1	0	0
1	59	6	0	1	0	40.51	109	89	5.06	79.2	23.7656	250.8	3.95	0.92	0.95	2.78	686.178	5.41	12.92	6.3	1	93.6712	0	0	0	0
1	59	8	0	1	0	21.6	140	100	5.5	87.1	29.1473	240.2	4.71	2.42	1.33	2.81	605.173	14.66	28.23	10.7	1	83.4993	1	0	0	0
1	60	1	1	0	1	24.22	97	51	4.9	54.1	8.96	169.5	2.12	0.89	0.8	1.19	451.453	5.02	7.44	5.4	1	108.397	0	0	0	0
1	60	10	0	0	0	23.8	111	74	6.74	56.9	24.6947	242.1	3.52	0.86	0.94	2.07	342.56	10.37	17.11	11.1	1	106.172	0	1	0	0
1	60	15	1	1	0	25.39	145	64	6.9	74	3.75	190.1	3.88	0.77	1.11	2.55	737.368	18.28	27.41	12.5	1	100.975	0	1	0	1
1	60	20	0	0	0	32.81	126	75	7.2	67.6	25.5707	265.9	4.92	1.13	1.19	3.05	174.4	14.42	27.17	9.8	1	112.644	1	0	0	0
1	60	23	0	0	0	21.48	126	76	8.3	68	7.90747	233.6	4.76	1.09	1.27	2.75	344.9	10.53	21.18	8.5	1	111.843	0	0	0	0
1	60	3	1	0	0	31.64	130	80	6.52	54.5	3.57	251.9	3.83	0.89	1.03	2.41	560.521	6.16	20.25	8.7	1	108.069	0	0	0	0
1	60	3	1	0	0	22.72	160	90	4.22	72.5	10.37	257.9	5.17	6.52	0.82	1.48	394.285	9.17	15.8	9.2	1	103.506	1	0	0	0
1	60	3	0	0	0	34.72	134	82	5.82	71.6	5	266.9	3.57	1.89	0.81	2.36	405.863	3.97	7.6	5.2	1	105.081	1	0	0	0
1	60	30	0	0	0	20.94	125	65	2.79	67.4	22.66	254.1	4.56	4.86	0.85	1.99	449.614	7.41	11.84	7.8	1	113.048	1	0	0	0
1	60	4	0	0	0	28.08	122	82	4.86	101.4	17.3	242.1	5.14	10.93	0.75	1.57	600.631	13.67	22.16	8	2	68.9944	1	0	0	0
1	60	6	0	0	0	20.34	120	70	4.1	70.1	2.08	220.8	3.68	0.87	0.95	2.11	482.44	15.68	21.69	11.9	1	107.806	0	0	0	0
1	60	9	0	0	0	20.43	135	75	7.01	80.7	15.9	251.9	4.29	4.01	0.82	1.95	394.171	12.97	22.9	9.3	1	90.9293	1	1	0	0
1	61	0.1	1	0	0	26.44	128	63	3.98	67.8	3.33	227.9	7.05	2.09	1.1	5.11	475.13	10.57	18.51	10.8	1	111.457	1	0	0	0
1	61	0.6	0	0	0	28.2	140	80	6.24	77.6	15.536	261.1	3.17	1.11	0.81	1.95	636.4	8.51	11.89	6.7	1	94.6718	0	1	0	0
1	61	0	1	0	0	21.26	124	75	6.32	82.7	4.04587	232.1	5.88	1.9	0.93	3.56	474.013	8.38	26.47	10	2	87.6595	0	0	0	0
1	61	1	1	1	0	22.41	107	57	4.17	61.3	11.47	219.3	2.58	1.03	0.99	1.45	502.138	7.69	19.93	9	1	102.25	1	0	0	0
1	61	10	0	0	0	32.05	153	97	4.47	63.1	5.87	234	4.3	3.39	0.97	1.83	486.227	7.47	12.85	7.1	1	121.57	1	0	0	0
1	61	10	0	1	0	32.05	135	78	6.1	71.4	5.08	268.8	5.85	2.33	1.26	2.88	1134.44	7.81	20.69	6	1	104.699	0	0	0	0
1	61	13	0	0	0	21.23	109	80	11.4	151.1	80.83	226.6	3.46	1.22	0.96	2.01	531.82	10.62	27.34	15.7	3	42.2992	0	0	1	0
1	61	16	1	0	1	24.22	127	78	3.7	36.2	5.34	256.7	3.84	0.78	1.15	2.48	610.844	9.33	27.1	11.7	1	126.964	1	0	0	0
1	61	16	1	1	1	21.88	130	80	6.74	77.2	5.71	265.9	4.6	1.68	1.27	2.94	464.188	8.85	15.58	7	1	95.2651	1	1	0	0
1	61	3	1	1	0	24.88	124	80	4.16	79.1	1.9	267.6	3.89	0.62	1.29	2.33	440.69	4.61	9.38	6	2	92.5056	0	0	0	0
1	61	4	1	1	0	23.05	110	70	5.05	65	10.54	243	5.39	1.19	1.45	3.69	365.186	7.12	19.37	6.8	1	117.287	1	0	0	0
1	61	4	0	0	0	22.43	130	80	3.76	60.7	13.7959	243.1	3.65	1.75	0.92	1.75	236.42	5.22	16.69	7.5	1	102.664	0	0	0	0
1	61	6	0	0	0	25.82	130	80	5.53	81.1	4.47	262.5	4.46	0.73	1.21	2.76	293.928	3.64	10.74	5.5	2	89.7547	0	1	0	0
1	61	7	1	0	0	24.97	125	80	3.96	64.1	25.2	197.3	3.94	1.85	1.01	2.21	345.844	5.75	20.68	8.7	1	119.281	0	1	0	0
1	61	8	1	0	0	24.3	135	90	4.86	58.9	14.45	225.6	3.28	0.51	1.2	2.07	564.57	11.47	21.08	14.8	1	103.942	0	0	0	0
1	62	0.25	1	1	1	22.21	119	72	3.34	64	18.84	147.2	4.65	1.74	0.77	2.84	774.987	9.89	22.64	13.7	1	118.67	1	0	0	0
1	62	1	1	0	0	22.03	141	84	6.3	70.4	22.66	135.9	4.33	1.21	1.22	2.56	686.058	11.37	27.23	11.9	1	105.754	1	0	0	0
1	62	10	1	1	0	36.79	130	75	5.8	76	24.8442	244.1	5.19	0.78	1.21	3.26	287.59	5.89	17.81	7.7	1	96.4071	0	0	0	0
1	62	10	0	0	0	21.88	160	100	8.57	120.5	27.2263	264	5.41	2.69	0.91	3.76	324.312	5.1	12.38	6.7	3	55.2204	1	0	1	0
1	62	10	1	0	0	25.15	120	60	6.55	67.5	7.04	190.4	4.93	0.65	1.09	3.57	423.977	8.78	16.79	7.7	1	111.272	0	0	0	0
1	62	14	0	0	0	24.3	142	88	4.2	58.3	7.29	245.9	6.12	4.25	0.76	2.47	828.44	8.21	32.32	9	1	103.65	0	0	0	0
1	62	17	1	0	0	33.71	105	80	8.22	66.9	29.16	231.2	3.66	0.78	0.97	2.25	375.161	4.87	11.53	5.3	1	112.479	0	0	0	0
1	62	17	1	0	0	22.83	102	82	6.39	62.6	6.77	266.4	5.69	1.37	1.13	3.79	412.514	14.25	28.76	11.6	1	121.886	0	0	0	0
1	62	18	1	0	0	23.38	125	80	4.32	54.2	27.0598	188.5	4.34	0.65	1.36	2.72	510.57	8.37	15.39	7.1	1	106.803	0	0	0	0
1	62	3	0	0	0	26.17	130	71	4.96	69.7	3.2863	224.8	4.13	4.87	0.87	1.89	598.113	10.28	18.76	9.5	1	107.04	0	0	0	0
1	62	3	1	0	0	22.04	175	83	5.81	76.7	5.75	258.8	5.33	3.95	0.83	3.13	609.404	6.97	13.69	7.6	1	95.3443	1	0	0	0
1	62	4	0	0	0	22.22	140	88	9.52	92.5	12.1486	246.6	5.79	0.99	2.05	2.98	598.278	3.94	16.5	6.9	2	76.0234	0	0	0	0
1	62	4	0	0	0	28.33	163	84	4.09	62.5	3.96	204.1	3.25	3.51	0.82	1.25	611.675	5.37	13.14	7	1	122.122	1	1	0	0
1	62	7	1	1	0	34.17	135	75	6.12	90.8	3.86	198.7	5.21	3.19	1.18	2.96	714.68	16.69	25.1	10.3	2	77.7475	1	0	0	0
1	63	0	1	0	0	24.01	139	87	5	51	6.47	254.4	4.34	1.82	0.93	2.6	547	9.83	22.91	11.8	1	108.742	0	0	0	0
1	63	10	0	0	0	26.62	105	64	8.4	64	22.66	224.9	3.81	0.43	1.28	2.06	254.38	5.54	6.92	5.6	1	117.839	0	0	0	1
1	63	13	1	1	0	20.28	130	80	5.87	79.4	14.7578	264	4.78	2.65	1.19	2.64	531.911	9.2	21.94	8.1	1	90.7985	1	0	0	0
1	63	15	1	0	0	26.49	110	74	4.95	60.8	5.75	201.2	3.67	0.84	0.96	2.46	442.739	13.71	21.5	10.6	1	101.163	0	1	0	0
1	63	15	0	1	0	18.97	180	80	4.88	87.3	12.86	245.4	3.9	1.12	1.12	2.29	638.969	8.9	17.28	8	2	80.9609	0	0	0	0
1	63	2	0	0	0	22.58	115	60	6.68	76.6	3.47	227.7	2.98	0.7	1.21	1.51	548.552	6.96	8.73	6.1	1	94.8264	0	0	0	1
1	63	2	1	0	0	23.81	108	85	5.22	61.1	15.91	217	3.94	1.34	0.64	2.62	639.292	7.7	19.68	8.8	1	100.959	0	0	0	0
1	63	3	0	0	0	29.14	133	72	5.02	80.4	5.72	214.4	4.79	0.72	1.71	2.39	644.888	10.39	27.04	6.8	1	89.4349	0	0	0	0
1	63	3	1	1	0	33.87	125	75	3.95	63.1	15.8	244.6	3.46	0.95	0.61	2.66	576.132	8.37	19.77	8.3	1	119.874	1	0	0	0
1	63	8	0	1	0	22.27	120	80	6.06	73.7	18.08	229.9	4.89	1.26	1.53	3.21	481.02	6.76	11.74	7.7	1	99.3559	0	0	0	0
1	64	0.6	0	1	0	27.73	138	94	4.77	78.5	4.37273	247.8	4.64	2.06	1.03	3.05	373.072	14.85	26.08	12.9	1	91.4142	0	0	0	0
1	64	10	1	1	1	25.95	125	75	6.29	58	19.95	236.5	6.85	1.33	1.29	4.38	571.111	7.09	14.44	6.7	1	102.421	1	0	0	0
1	64	10	0	0	0	28.76	119	69	7	60	22.66	259.3	4.2	1.94	0.87	2.53	196.11	5.01	11.56	6.1	1	101.003	0	0	0	0
1	64	10	1	1	0	24.09	118	59	6.23	95.3	5.48	195.4	5.23	6.48	1.01	2.31	438.189	12.81	19.23	9.2	2	72.3082	0	0	0	1
1	64	10	1	1	0	26.57	144	62	3.91	53.5	4.97	242	3.05	1.94	0.67	1.7	689.816	4.19	13.79	6.9	1	105.877	0	0	0	0
1	64	14	1	1	0	20.87	156	81	7.55	65.9	7.64	253.2	3.32	1.76	0.48	2.25	485.667	11.06	17.53	10.4	1	112.948	0	0	0	0
1	64	18	1	1	1	29.74	116	75	5.5	58.2	9.07	244.1	4.03	1.03	1.52	2.2	486.189	4.04	22.25	7.5	1	102.276	0	0	0	0
1	64	2	1	0	0	22.21	95	57	5.33	54.1	13.93	184.1	4.58	1.17	1.23	3.23	273.099	6.99	18.75	9.8	1	105.393	0	0	0	0
1	64	2	0	0	0	22.89	135	94	4.5	62	16.6955	202.2	4.32	1.5	0.87	2.69	165.27	10.03	15.2	11.7	1	121.593	0	0	0	0
1	64	20	1	0	0	22.59	143	68	9.35	84.8	4.34	257.4	3.05	0.63	1.58	1.28	565.51	14.48	19.68	8.1	1	83.2684	0	0	0	0
1	64	5	1	1	1	23.95	185	91	5.06	76.2	21.75	202.2	4.81	0.69	1.71	2.23	775.04	6.6	14.45	7.2	1	94.7605	0	0	0	0
1	64	6	1	0	0	25.78	131	76	6.2	82	7.93	266.5	2.97	0.76	0.9	2.01	526.01	9.27	22.69	11.4	1	86.7182	1	0	0	0
1	64	9	0	0	0	25.63	155	95	3.86	59.9	7.67	237.2	4.32	0.85	0.98	3.21	509.693	12.37	21.55	9.7	1	101.073	0	0	0	0
1	65	0.5	1	0	1	29.62	108	67	5.11	66.9	5.05	258	4.71	1.59	1.21	2.64	469.893	8.26	21.2	12.1	1	110.134	0	0	0	0
1	65	0.5	1	1	1	23.63	135	80	6	67.3	8.63	208.3	5.67	1.82	1.06	4.11	539.128	10.02	21.4	10	1	109.343	1	0	0	0
1	65	0	0	1	1	28.58	136	88	3.47	73.3	18.42	260.5	3.8	1.93	0.95	2.66	690.492	5.75	15.42	7.6	1	98.6165	1	0	0	0
1	65	10	1	1	0	26.04	112	55	4.8	62	4.88	261.9	4.41	1.68	0.84	3.12	275.67	11.07	18.35	10.3	1	120.742	0	0	0	0
1	65	11	0	0	1	21.16	140	75	5.09	65.3	22.66	255	4.91	1.93	1.22	3.14	389.477	10.98	22.68	9.2	1	113.404	0	0	0	0
1	65	15	1	0	0	25.39	140	80	9.96	76.4	29.7735	235.2	2.9	1.46	0.92	1.62	905.09	4.92	15.6	8.1	2	93.7995	1	0	0	0
1	65	18	0	0	0	28.76	132	70	4.3	49.3	21	209.2	3.85	1.02	0.97	2.64	614.966	5.28	14.12	8.1	1	108.729	1	0	0	1
1	65	2	1	0	0	25.72	146	66	8.4	72	22.66	247.3	5.44	1.82	0.98	3.07	485.2	9.78	21.05	9.6	1	100.773	0	0	0	0
1	65	2	0	0	0	23.92	110	80	6.88	50	2.67	217.9	5.2	3.17	0.87	2.92	561.306	15.17	25.73	15.8	1	108.101	0	0	0	0
1	65	20	0	0	0	22.83	126	60	3.85	71.5	9.6	266.9	4.5	1.16	1.38	3.36	693.345	6.75	17.68	7.9	1	101.626	0	0	0	0
1	65	20	0	0	0	19.52	130	68	6.5	64	19.4694	261.6	3.4	0.89	1.27	1.6	804.44	5.72	20.93	6.9	1	116.195	0	0	0	0
1	65	20	1	0	0	25.53	161	85	6.9	93	6.69	238.5	4.96	2.38	1.14	2.9	854.68	16.32	28.08	9.2	1	73.9545	1	0	0	0
1	65	20	1	0	0	24.54	135	75	8.3	57.2	28.05	183.7	5.09	1.24	1.14	3.69	495.45	8.7	23.54	12.2	1	102.286	1	0	0	1
1	65	3	1	0	1	35.34	150	100	6.29	87	23.9055	253.6	3.76	1.61	0.82	2.77	396.553	7.49	15.34	8.1	2	80.1644	1	0	0	0
1	65	5	1	0	0	20.83	153	86	4	69.9	22.66	185.7	3.35	0.72	0.83	2.09	317.33	12.36	20.61	9	1	104.445	0	1	0	0
1	66	0.1	1	1	0	24.44	95	72	3.3	64	5.92061	208.7	4.68	1.21	0.97	3.39	806.211	9.42	22.2	7.1	1	115.382	0	0	0	0
1	66	0.2	1	1	0	22.14	135	88	2.8	50.1	16.2269	227.8	4.75	0.9	2.39	1.78	818.17	10.54	22.58	9.9	1	107.256	1	0	0	0
1	66	10	0	0	0	21.09	144	84	7.11	97.1	3.23	174.6	3.99	1.14	1.13	2.36	603.544	8.37	22.52	9.3	2	69.7046	0	0	0	0
1	66	10	0	0	0	19.56	135	75	5.06	65.7	12.17	227	4.17	0.82	1.05	2.62	526.463	5.84	15.68	7.4	1	111.782	0	0	0	0
1	66	11	0	0	1	27.38	100	59	5.8	69.8	7	209	5.49	1.42	1.3	3.74	264.107	8.87	25.82	9.9	1	103.893	0	1	0	0
1	66	2	1	1	0	21.36	150	89	6.7	70.1	8.81	259.1	6.04	1.86	1.01	4.63	339.85	13.57	27.83	11.3	1	103.356	1	0	0	1
1	66	3	1	1	0	22.67	156	90	4.71	74.8	7.39141	192.7	5.84	1.56	1.35	3.66	192.008	10.57	18.12	7.5	1	95.557	1	0	0	1
1	66	3	0	0	0	23.03	125	79	7.99	70.1	7.65	173.4	4.62	2.7	1.05	2.55	605.907	12.86	21.8	10.7	1	103.356	1	1	0	0
1	66	3	0	0	0	21.03	135	84	4.5	81.7	17.11	186.9	5.42	1.95	1.03	3.78	590.177	7.51	15.77	5.8	1	85.8881	1	0	0	0
1	66	4	1	0	0	22.86	122	66	5.1	58	1.26498	242	3.36	1.35	0.88	1.91	379.29	7.39	11.96	6.4	1	100.992	0	0	0	0
1	66	7	0	0	0	22.31	137	77	7.1	96.9	3.67	194.2	3.71	1.05	1.15	2.18	263.001	10.25	22.84	9.6	2	69.8786	0	0	0	0
1	66	9	0	0	0	23.05	140	76	8.5	59	19.1997	261.6	3.74	0.54	1.29	1.99	205.06	9.47	15.09	8.1	1	100.285	0	0	0	0
1	67	0.5	0	1	1	22.43	160	90	6.7	64	25	209.6	3.88	1.35	0.75	2.78	347.64	7.55	15.88	8	1	114.574	1	0	0	0
1	67	10	0	0	0	22.27	130	68	7.71	63	11.98	205.5	5.4	0.58	1.75	3.01	429.253	15.71	27.04	11.1	1	116.777	0	0	0	0
1	67	10	0	0	0	23.95	130	80	3.06	58.2	16.6	191	4.11	1.27	1.17	2.9	533.248	7.04	15.49	7.9	1	100.143	0	0	0	0
1	67	12	0	0	0	19.03	120	80	5.3	55	23.88	260	3.55	1.01	1.09	1.82	469.92	9.27	19.07	8.4	1	102.498	0	0	0	0
1	67	20	0	0	0	23.44	130	80	6.67	82	22.43	201.9	3.68	1.18	1.03	2.14	504.686	11.07	23.71	12.4	1	84.9098	0	0	0	0
1	67	21	1	1	0	24.75	121	68	7.8	73.8	22.66	202.3	3.06	1.7	0.81	1.78	339.3	16.77	24.74	8.6	1	96.4448	1	0	0	0
1	67	21	1	1	0	23.38	141	71	7.2	72	5.72299	210.4	3.98	2.49	0.79	2.31	541.81	9.34	17.66	8.6	1	99.3674	1	0	0	0
1	67	21	0	0	1	26.67	154	87	5.61	68.1	6.61993	215.3	3.32	1.42	1.34	1.66	583.349	11.67	25.65	10.5	1	106.288	1	0	0	1
1	67	4	1	1	0	22.51	110	70	6.61	63	3.68	250.5	5.25	1.62	0.9	3.91	662.071	8.07	22.13	6.9	1	116.777	0	0	0	0
1	67	5	1	0	0	28.04	135	76	10.52	93.5	4.08966	213.4	3.61	0.64	1.35	1.97	717.011	3.03	11.99	5.3	2	72.4515	0	0	0	1
1	67	7	1	1	0	30.82	118	69	5.57	64.5	3.88	251.3	4.18	1.55	1.19	1.92	359.677	7.01	15.13	7.2	1	113.501	0	0	0	0
1	67	8	0	0	0	19.63	150	89	6	112	25.1096	197.7	4.36	1.55	1.04	2.34	312.35	7.4	19.7	7.7	3	58.2444	1	0	1	0
1	67	9	1	1	0	26.67	156	78	4.34	73	22.66	258.5	3.71	0.7	1.13	2.41	211.493	4.98	12.39	8.7	1	97.724	0	1	0	1
1	68	1	0	0	0	21.93	155	85	5.01	61.3	15.34	212.9	5.11	1.07	1.1	3.71	600.692	5.58	12.9	9.2	1	97.3436	1	0	0	0
1	68	10	0	0	0	27.73	116	80	7.56	90.5	2.25	264.2	3.26	0.94	1.2	1.55	319.961	5.03	17.71	7.3	2	74.8376	0	0	0	0
1	68	10	0	0	0	22.86	131	73	3.79	65.7	4.19	211.9	4.6	1.42	1.15	2.99	757.538	10.52	18.48	9.3	1	110.223	0	0	0	0
1	68	10	0	1	0	23.01	138	95	5.7	76.4	22.66	246.4	3.74	1.6	1.08	2.03	828.4	11.52	21.89	9.2	1	91.8434	0	0	0	0
1	68	12	1	1	0	20.58	130	80	4.6	67.8	18.37	233.7	4.11	1.12	0.81	2.81	430.029	9.14	23.18	11.8	1	106.109	0	0	0	0
1	68	13	0	0	0	26.35	120	80	6.69	99.4	5.71	244.5	5.01	1.24	1.23	3.21	629.937	6.88	11.31	6.5	2	66.8141	0	0	0	0
1	68	2	0	0	1	29.14	102	60	4.74	76.3	4.83334	168.8	3.05	1.39	0.97	1.73	598.573	5.35	10.34	5.7	1	91.989	0	0	0	0
1	68	20	1	0	0	28.4	140	90	7.5	71.7	26.66	234.7	4.1	2.36	0.8	2.64	474.111	10.47	25.35	11.19	1	99.1711	1	0	0	0
1	68	6	1	1	0	31.74	135	80	4.32	57.6	19.81	177.6	3.46	0.99	1.2	1.69	519.629	7.39	19.55	8.9	1	99.8665	1	1	0	0
1	68	8	0	1	0	25.39	110	78	5.5	74.8	22.66	230.7	4.84	0.76	2.04	2.71	1139.86	15.95	28.06	7.2	1	94.2239	0	0	0	0
1	68	8	1	0	0	25.39	118	63	5.5	61	10.1016	191.7	4.16	1.09	1.13	2.46	291.09	13.14	22.51	12.7	1	97.5401	0	0	0	1
1	69	0.5	0	0	0	26.84	109	69	5.1	52.7	9.86	209.9	3.39	0.54	1.2	1.95	515.57	12.89	24.53	11.9	1	102.858	0	0	0	0
1	69	0	0	1	0	27.89	178	98	2.77	60.2	4.67927	174.2	6.27	1.69	1.01	4.89	639.856	11.11	25.59	15.2	1	97.3842	0	0	0	0
1	69	12	0	0	0	23.83	98	61	3.65	61.1	5.65	209.3	4.35	1.5	1.04	2.79	691.923	5.99	7.03	5.7	1	96.7921	0	0	0	0
1	69	17	0	0	1	22.58	126	70	6.05	51.9	6.91	202.2	4.31	0.62	1.62	2.78	633.796	4.39	8.57	6.4	1	103.507	0	0	0	0
1	69	2	1	0	0	24.61	121	76	4.4	64	13.8095	241	4.49	0.96	0.98	3.01	193.62	13.48	26	17.7	1	112.976	0	0	0	1
1	69	4	1	0	0	28.44	148	84	8.5	76.1	22.66	167.5	4.35	0.83	0.86	3.09	767.168	15.8	29.36	7.3	1	91.6354	0	0	0	0
1	70	0	0	0	0	24.97	144	67	5.42	78.7	23.1026	226.4	4.77	3.09	1.38	2.48	299.983	6.99	15.93	8	1	87.3722	0	0	0	0
1	70	20	1	1	0	21.23	136	72	4.53	71	5.85	258.7	3.83	1.47	1.3	2.42	480.939	8.35	16.83	7.3	1	98.9544	1	0	0	0
1	70	4	0	0	0	19.53	136	77	5.8	61	14.3235	170.2	4.74	1.11	1.44	3.23	229.585	5.37	16.83	7.6	1	96.1793	0	0	0	1
1	70	6	0	1	0	19.43	130	60	5.7	71	5.24	261	4.08	1.6	0.68	2.73	199.32	10.09	9.62	10.3	1	98.9544	0	1	0	0
1	71	0.25	1	0	1	21.94	150	80	4.77	87.2	22.66	245.7	6.18	2.65	1.16	3.35	440.449	9.24	18.7	9.8	2	76.6428	0	0	0	0
1	71	18	0	0	0	22.03	136	98	5.86	80	12.5	214	6.44	1.1	1.66	4.73	499.5	18.15	29.98	13.4	1	85.0589	0	0	0	0
1	71	18	1	1	0	25.17	122	73	6.3	73	22.66	256.1	3.37	1.25	1.07	1.82	631.29	16.51	22.62	11.7	1	95.0164	0	0	0	0
1	72	0.25	0	0	0	24.69	110	70	6.7	91	5.92684	181.5	4.32	0.86	0.99	2.86	602.36	21.68	30.66	9.7	1	72.281	0	0	0	1
1	72	10	0	0	0	24.24	135	80	5.91	63.8	5.9	205.4	3.6	0.75	1.02	2.61	322.032	5.04	18.59	9.6	1	111.039	0	0	0	1
1	72	10	1	1	0	26.56	125	83	8.5	65	21.393	241.4	3.44	1.69	0.95	1.95	388.69	11.54	22.82	9.5	1	108.566	1	0	0	1
1	72	17	1	0	0	20.96	120	70	7.45	70.9	22.66	213.4	5.5	0.81	1.13	3.45	410.466	4.79	12.97	6.5	1	97.7403	0	0	0	0
1	72	2	0	0	0	26.5	105	80	8.89	87.2	9.15	267.4	6.01	0.99	1.74	3.91	506.611	6.24	13.61	5.4	2	76.1063	0	0	0	0
1	72	5	1	0	0	18.67	132	73	5.8	77	3.74	196.3	4.77	1.59	1.65	2.26	258.35	14.28	18.05	9.8	1	88.4581	0	0	0	1
1	73	0.25	1	0	0	22.94	125	63	3.07	88.3	22.66	138.9	3.28	1.75	0.63	2.24	640.685	10.67	19.06	10.4	2	74.4368	1	0	0	0
1	73	1	0	0	1	26.71	140	73	3.94	80.7	17.1232	221.6	3.8	0.7	1.2	2.54	574.657	5.28	6.81	5.5	2	82.9935	0	0	0	0
1	73	11	0	0	0	25.07	114	61	5.8	72	2.64843	227.1	2.25	1.02	0.8	1.06	857.7	10	10.95	7.1	1	95.2663	0	0	0	1
1	73	16	0	0	0	24.56	126	70	5	99.1	6.2	268.4	4.86	0.99	1.13	3.42	427.063	4.44	14.83	7.1	2	64.7442	0	0	0	1
1	73	20	0	0	0	23.82	134	79	4.21	99.2	5.8	258.5	3.21	1.86	0.64	2.13	372.268	7.05	16.39	10.7	2	64.6653	1	0	0	0
1	73	20	1	1	0	24.97	135	85	3.15	59.6	11.55	168.4	4.65	2.13	1.12	2.67	573.406	12.42	21.91	10.6	1	95.0766	1	0	0	1
1	74	30	0	0	0	23.05	127	65	4.54	65.7	3.05	219.3	3.19	0.97	1.55	1.46	231.844	5.82	20.49	7.4	1	105.674	0	0	0	0
1	75	20	0	0	0	21.21	140	70	7.2	74.3	6.75	117.9	4.45	1.09	1.18	2.91	358.931	9.4	23.09	11.8	1	90.4331	0	0	0	0
1	75	20	0	0	0	21.23	110	70	7.8	66	14.5762	191.8	4.08	0.76	1.06	2.76	282.94	6.5	20.59	9.5	1	104.358	0	0	0	1
1	75	6	0	1	0	20.24	145	90	6.97	84.8	5.05	213.4	5.46	2.12	1	2.83	410.047	8.06	19.6	8.8	2	77.0765	0	0	0	0
1	76	14	0	0	0	31.25	130	70	7.95	80	12.5	244.9	4.57	1.27	1.1	3.4	560.859	7.72	22.36	9.1	1	82.1233	0	0	0	0
1	76	20	0	0	0	33.2	109	69	7.43	92.3	8.64666	258.7	3.66	1	0.84	2.59	537.43	13.2	21.64	8.9	1	69.0833	1	0	0	0
1	77	0.1	0	0	0	20.31	110	60	4.74	53.2	23.66	254.5	3.72	0.68	1.29	2.38	467.843	6.9	14.55	6.2	1	96.8606	0	0	0	0
1	77	10	0	0	0	21.08	130	78	5.21	67.1	8.65	117.5	3.63	1.55	0.74	2.63	433.21	7.63	22.71	8.1	1	100.866	0	0	0	0
1	77	10	0	0	0	20.54	132	77	6.37	78.2	11.81	200.6	3.11	0.91	1.25	1.65	597.023	11.55	22.82	10.1	2	83.8232	1	1	0	0
1	77	11	0	0	0	19.81	170	75	5.64	79.6	21.77	259.8	4.62	1.54	1.06	3.29	535.053	8.29	17.39	7.3	1	82.0441	0	0	0	0
1	77	11	0	0	0	18.08	150	78	6.7	94.7	5.62	175	4.5	1.29	1.23	2.67	870.632	8.81	19.89	9.7	2	66.5034	0	0	0	0
1	77	16	0	0	0	23.71	142	84	6.73	83.4	28.41	170.8	6.37	1.81	1.37	4.65	383.187	18.16	30.44	11.9	1	77.5464	0	0	0	0
1	77	4	0	0	0	23.19	131	76	4.99	61.4	7.68	255.8	3.64	1.27	1	1.75	225.666	6.14	16.19	9.8	1	91.3187	0	0	0	0
1	78	0.25	0	0	0	24.02	140	90	4.43	61.2	8.54	230.6	4.53	1.31	0.89	3.17	583.555	9.32	14.31	12.4	1	90.8011	1	0	0	0
1	79	20	0	0	0	22.22	120	70	3.4	78.7	22.93	252.9	2.57	0.82	0.71	1.22	530.762	5.9	16.9	4.9	1	82.0193	0	0	0	0
1	79	20	1	0	0	17.97	127	63	5.79	62.5	9.27771	245.6	3.36	1.52	1.13	1.97	578.069	8.88	15.88	9.5	1	108.375	0	0	0	0
1	79	21	0	0	0	23.05	120	60	5.81	89.9	26.12	259.5	5.32	1.83	1.01	3.84	450.27	11.48	15.11	9	2	69.832	0	0	0	0
1	80	30	0	0	0	25.53	120	80	4.84	57.2	17.6289	195.5	5.02	2.16	0.87	3.01	487.83	10.98	23.52	14	1	92.0566	0	0	0	0
1	81	12	0	0	0	29.43	153	89	4.62	78	22.371	257.3	5.15	0.94	1.24	3.3	589.639	6.51	22.4	11	1	81.7534	0	0	0	0
1	84	30	0	1	0	20.03	123	68	5.1	76	18.7225	251.4	4	2.11	1.26	1.68	263.73	7.16	16.04	7.9	1	82.6023	0	0	0	0
1	85	10	1	1	0	28.35	133	60	5.9	87.7	16.9952	192.6	3.57	0.57	1.08	2.23	499.274	7.57	14.97	7.6	1	68.9856	0	0	0	0
1	85	20	1	0	0	19.07	130	74	3.6	65.4	5.84	223	4.55	0.73	1.08	3.49	338.441	4.04	13.98	7.1	1	98.3585	0	0	0	0
1	86	6	0	0	0	25.51	163	80	5.9	63	22.66	248.2	3.06	0.87	1.15	1.41	313.65	11.86	25.54	10.4	1	102.186	1	0	0	1
1	79	18	0	0	0	25	151	84	5	62	29.3746	221.5	6.09	0.86	1.07	4.38	455.45	11.54	19.07	9.2	1	109.433	0	0	0	0
1	24	0.1	0	1	0	29.14	133	83	3.6	67	3.13168	293.2	4.42	1.6	1.1	2.5	920.77	6.6	15.59	13.3	1	146.628	0	0	0	0
1	24	0	0	0	0	23.74	125	80	3.88	63.1	8.94	307.7	3.44	1.4	0.72	2.66	624.66	4.44	9.05	10	1	157.654	1	0	0	0
1	28	2	1	1	0	22.77	139	86	6.3	74.1	27.1319	322.4	3.94	0.92	1.19	2.08	247.37	8.95	18.42	13	1	126.22	1	0	0	0
1	29	0.5	1	0	0	22.94	154	82	5.22	64.4	8.29	275.1	4.43	1.45	1.04	3.18	480.199	8.93	21.21	9.4	1	148.506	1	0	0	0
1	29	0	0	0	1	24.98	130	80	3.48	60.5	5.01	319.9	4.4	3.19	0.98	2.59	622.228	11.62	21.05	11.1	1	128.716	1	0	0	0
1	29	0	0	1	0	30.86	133	96	3.9	43	22.66	299.1	3.84	1.94	0.68	2.44	439.43	13.25	20.96	11.5	1	148.108	1	0	0	0
1	30	0.1	0	0	1	20.75	110	70	4.44	63	4.68	285.7	3.26	0.62	1.06	1.81	535.392	6.21	17.17	12.2	1	151.438	0	0	0	0
1	30	0.5	0	0	0	24.22	123	72	3.4	52	7.03	273.9	3.79	2.04	1.13	2.05	607.904	8.61	20.1	15.2	1	136.021	0	0	0	0
1	32	0	0	0	0	26.14	119	72	3.47	58.3	13.7562	314.2	4.23	1.93	0.71	3.01	883.267	5.76	12.2	9.9	1	127.965	1	0	0	0
1	32	1	0	0	0	24.34	115	74	5	61	22.7207	319.6	4.54	2.71	0.99	2.21	569.88	12.11	21.29	10.6	1	125.606	0	0	0	0
1	32	1	1	0	0	25.71	120	78	4.28	52.3	3.39	287	6.1	1.03	0.94	4.93	437.053	11.69	16.84	10.8	1	133.806	1	0	0	0
1	32	2	1	1	0	18.65	133	76	5.7	55	6.3	272.6	5.76	0.76	1.39	4.59	469.91	18.01	32.05	10.8	1	131.066	0	0	0	1
1	32	5	1	1	0	23.73	102	64	4.7	54	7.77	269.4	3.75	1.65	0.79	2.46	737.24	15.22	18.12	11.8	1	132.059	0	0	0	0
1	32	5	1	1	0	26.71	115	77	2.44	58.9	29.4	314.8	4.27	7.14	0.9	1.7	782.773	8.15	19.22	7.5	1	127.428	1	0	0	0
1	33	0.4	1	1	1	23.42	130	80	3.79	70.6	22.66	286.2	5.87	1.94	0.98	4.51	480.053	4.44	10.47	6.5	1	129.205	0	0	0	0
1	34	2	1	1	0	23.05	165	115	4.2	56	27.1885	269.8	5.62	1.54	1.19	3.46	836.95	15.58	27.45	13.4	1	128.284	0	0	0	0
1	34	3	0	0	0	39.84	142	76	5.04	68.6	24.72	300.7	7.9	3.34	1.12	5.21	374.592	14.17	20.61	10.7	1	132.837	0	0	0	0
1	34	3	1	1	0	20.96	120	80	4.73	53.6	4.65	278.7	5.13	3.42	0.93	2.99	456.528	12.49	23.15	12	1	130.615	1	0	0	0
1	35	0.1	0	0	0	24.78	126	73	3.9	48	9.06797	319.7	4.4	1.06	0.82	2.69	460.11	13.62	21.71	13.1	1	135.718	0	0	0	0
1	35	0	1	1	0	27.69	130	80	4.4	60.9	12	325.3	4.51	1.48	0.89	3.77	753.436	9.8	22.01	9.7	1	123.07	0	0	0	0
1	35	1	1	1	1	32	116	63	5.16	52.4	4.02	313.3	4.31	2.22	0.83	2.81	581.308	9.02	17.77	5.9	1	130.913	1	0	0	0
1	35	8	1	1	0	22.77	109	68	4.7	53	24.8232	317.6	5.23	1.8	1.15	3.28	140.39	14.64	21.43	11.1	1	130.302	0	0	0	0
1	35	8	0	0	0	19.63	138	95	4.8	73	6.75	289.8	3.39	4.35	0.58	1.82	326.93	8.11	12.54	7.5	1	122.356	0	0	0	0
1	35	8	0	0	0	24.44	134	88	4	56	25.3664	318.8	6.16	2.45	1.4	3.75	373.69	6.62	11.2	6.3	1	127.386	1	0	0	0
1	36	10	1	1	0	25.39	118	80	3.5	79	22.66	271.7	4.57	4.1	0.97	2.22	156.9	16.18	23.44	11.2	1	110.434	0	0	0	0
1	36	2	1	0	1	25.48	120	70	5.31	58.2	8.87	313.6	6.21	2.52	1.03	4.41	606.605	11.83	18.21	9.9	1	124.507	0	0	0	0
1	36	3	0	0	0	27.1	115	75	5.2	77	22.66	313	3.78	1.01	1.16	2.14	391.45	4.59	8.06	5.3	1	113.911	0	0	0	0
1	36	3	1	0	1	25.96	120	90	3.83	65.6	3.64	285.4	7.5	3.33	0.91	4.44	689.451	4.53	12.28	6.3	1	138.26	0	0	0	0
1	37	1	1	1	1	26.67	132	94	4.16	46	3.86	318	6.5	13.39	0.91	1.88	620.072	6.51	8.31	6.1	1	136.186	1	0	0	0
1	37	2	0	1	1	29.41	130	85	4.62	58.2	17.98	281.7	6.5	2.77	0.9	3.95	870.341	12.65	22.96	10.1	1	123.636	1	0	0	0
1	37	5	1	1	0	20.2	164	108	5.6	59	24.4372	325.7	5.32	1.34	1.66	2.67	453.71	11.89	19.45	7.9	1	122.944	0	1	0	0
1	38	0.8	1	1	0	26.31	130	80	5.3	65.3	4.98	298.6	4.83	6.1	1.09	2.29	575.804	5.84	19.39	8.5	1	137.088	1	0	0	0
1	38	1	1	1	1	30.3	147	90	5.63	67.5	6.5	285.3	5.1	9.21	0.78	2.08	455.509	6.4	17.96	8.7	1	131.705	1	0	0	0
1	38	1	1	0	0	24.09	126	73	4.3	68.8	22.66	305.1	4.35	6.16	0.72	2.26	275.01	6.51	14.26	6.7	1	128.702	0	0	0	0
1	38	10	1	1	0	22.89	147	90	5.8	84	27.4556	295	5.53	2.5	0.96	3.22	435.33	17.57	24.4	12.8	1	101.106	1	0	0	0
1	38	2	0	0	1	25.18	125	80	5.71	60.2	24.8123	287.5	5.24	3.52	0.92	3.23	643.51	16.01	21.12	5.9	1	121.077	0	0	0	0
1	38	4	1	0	1	22.48	137	76	5.1	71.3	3.65	275.1	8.36	4.41	0.99	4.97	550.84	10.83	20.22	8.5	1	123.267	1	0	0	0
1	38	9	1	0	0	26.44	110	70	4.6	48.7	11.6329	325	3.08	0.82	1.05	1.83	249.178	7.96	19.07	10.1	1	132.1	0	0	0	0
1	39	0.1	1	0	0	31.16	110	80	4.12	77.1	28.6254	321.6	6.81	7.88	1.08	2.5	684.366	6.3	14.38	11.3	1	111.36	1	0	0	0
1	39	0.25	0	0	1	26.76	121	70	6.81	67.2	10.34	282.7	5.18	3.08	0.84	4.02	841.3	12.99	22.32	9.4	1	131.489	1	0	0	1
1	39	0	1	0	0	24.89	135	71	6.24	78.8	4.65	292	6.7	2.51	1.01	4.74	520.799	11.8	29.78	10.3	1	108.462	0	0	0	0
1	39	11	0	1	0	24.77	138	72	4.81	64.5	3.95	302.2	4.65	0.86	1.25	3.13	587.279	11.9	24.27	9.4	1	138.173	0	0	0	0
1	39	3	0	0	1	25.15	138	90	4.55	60.1	5.81	319.2	4.55	5.75	0.8	2.22	695.214	7	12.17	6.2	1	120.312	1	0	0	0
1	39	3	1	0	0	29.17	138	80	4.55	85.6	8.39	303.1	5.69	2.96	0.88	4.08	763.889	4.74	16.66	6	2	98.1339	1	0	0	0
1	39	5	1	0	0	30.38	110	70	7.7	95.9	22.66	316.6	4.33	1.7	0.86	2.73	251.6	18.76	30.09	14.2	1	85.5384	0	0	0	0
1	39	5	1	0	1	22.48	143	96	4.28	66	13.2776	300.3	6.87	7.07	0.89	4.38	397.058	4.99	20.52	8.4	1	134.385	1	0	0	0
1	40	0.1	1	0	0	16	111	66	4.08	62	27.0102	269	3.6	1.64	0.86	1.81	491.493	10.56	24.03	11.6	1	143.922	0	0	0	0
1	40	0.1	0	0	1	21.48	125	92	3.31	77.8	19.47	305.9	3.07	1	0.89	1.83	394.632	3.95	10.43	6.8	1	109.379	1	0	0	0
1	40	0	1	1	0	34.72	137	90	7.69	69.7	26.84	294.3	6.75	5.34	1.15	3.96	814.895	11.73	23	8.9	1	124.928	0	0	0	0
1	40	1	0	0	0	25.11	115	78	5.7	68	27.169	298.6	3.89	1.09	1.01	2.44	536.16	3.94	8.96	5.6	1	128.714	0	0	0	0
1	40	2	0	1	0	23.88	138	95	5.1	54	29.8625	304.6	3.9	2.33	0.92	2.24	554.08	9.31	16.3	9.6	1	124.842	1	0	0	0
1	40	3	0	0	0	28.06	109	69	4.1	56	22.66	269.5	3.44	1.3	0.84	2.1	295.81	8.96	18.69	13.2	1	122.99	0	0	0	0
1	40	5	0	0	0	22.21	130	80	4.88	71.6	11.7	316.5	5.88	1.36	1.08	4.93	796.636	12.09	24.61	10.9	1	120.931	1	0	0	0
1	41	0.1	0	1	0	24.57	132	85	5.7	78	9.8223	319.6	6.78	3.04	0.94	4.25	816.99	8.53	17.12	10.9	1	108.277	1	0	0	0
1	41	1	0	0	1	25.33	147	97	5.41	61.2	5.01	322.3	4.49	1.8	0.92	3.05	400.629	6.4	18.09	9	1	117.752	1	0	0	0
1	41	1	0	0	1	31.11	110	70	6.52	78.7	13.0368	315	5.64	1.91	1.13	3.33	419.99	4.86	9.97	6.5	1	107.114	1	0	0	0
1	41	9	0	1	0	25.39	130	80	6.91	67.9	7.24	276.2	4.6	3.85	0.98	2.75	676.475	8.41	16.56	9.9	1	128.041	0	0	0	0
1	42	3	0	0	0	23.63	110	70	5.9	83	27.816	269	6.39	3.54	0.8	4.11	280.78	14.52	25.18	12.1	1	99.7383	0	0	0	0
1	42	3	0	1	0	25.39	153	90	3.98	68.3	11.02	301.7	5.42	4.16	0.86	3.27	537.133	8.52	18.76	7.5	1	126.245	0	0	0	0
1	42	4	1	1	0	21.05	110	70	5.3	50	22.66	281.6	10.79	20.88	0.61	1.53	515.02	11.74	23.68	10.5	1	127.056	0	0	0	0
1	42	7	0	0	0	17.78	130	90	3.99	59.4	5.27	320.3	4.82	5.06	0.94	2.57	532.842	12.45	25.29	8.8	1	118.371	1	0	0	0
1	42	8	1	1	1	20.66	110	70	6	60	22.66	309.5	6.5	3.85	0.88	3.75	998.93	16.29	19.37	9.8	1	117.883	1	1	0	0
1	43	0.2	1	1	0	23.73	138	76	4.4	70	19.8626	293.5	4.81	1.49	0.91	3.1	486.67	9.17	17.21	11.7	1	121.69	0	0	0	0
1	43	0.25	0	0	0	26.84	130	80	5.62	61.5	12.48	269	3	1.21	1.02	1.17	581.288	15.43	25.15	12	1	115.876	0	0	0	0
1	43	1	1	1	0	28.62	150	85	3.7	61	6.7	298	5.22	1.67	1.98	2.78	1048.46	13.65	20.87	7.8	1	116.266	0	1	0	0
1	43	10	1	1	1	24	128	90	5.15	58.3	13.21	294.3	4.32	1.41	0.89	2.75	617.783	7.82	14.03	7	1	118.449	1	1	0	0
1	43	2	1	1	1	23.81	123	73	5.23	91.8	15.4479	317.2	6.02	1.84	1.52	4.19	426.02	9.92	17.37	8.9	2	87.6799	0	0	0	0
1	43	3	1	1	0	28.37	109	71	8.78	55.9	22.66	301.2	6.91	7.56	1.02	3.5	849.57	15.44	19.88	12	1	120.514	0	0	0	0
1	43	5	0	1	1	22.03	135	90	5.49	55.8	6.63	271.5	5.12	3.04	1.2	2.63	678.832	9.09	16.71	9	1	120.602	0	0	0	0
1	43	7	1	1	0	25.48	140	90	5.95	64.8	9.86	287.5	5.18	1.73	0.76	3.66	434.828	8.53	20.57	10.7	1	133.593	0	0	0	0
1	43	7	1	0	1	25.61	132	77	3.99	66.8	21.0356	279.7	5.92	4.1	1.07	3.8	549.146	9.42	20.52	11.7	1	128.772	1	0	0	0
1	44	0.4	0	0	1	24.77	135	80	5.35	55.6	12.8713	277	5.63	0.97	1.43	4.16	508.187	12.83	25.8	12.6	1	119.935	0	0	0	0
1	44	0	1	1	0	27.1	110	70	3.9	66	22.66	283.6	5.8	2.15	0.84	4.1	324.28	11.09	17.93	9.4	1	129.747	0	0	0	0
1	44	0	0	0	0	28.55	138	98	5.64	71.6	5.91	280.6	4.11	3.12	0.87	1.91	743.074	8.27	13.14	7.7	1	117.581	1	0	0	0
1	44	0	1	0	0	32.37	114	84	6.34	67.6	17.4	318.5	4.92	3.17	0.85	2.94	647.621	8.59	16.08	9.6	1	126.044	1	0	0	0
1	44	0	0	0	1	28.4	107	67	5.73	107.5	5.2	294.5	6.64	1.68	1.02	4.89	412.855	18.32	26.96	9.9	2	71.9371	1	0	0	0
1	44	0	1	0	1	22.48	120	70	5.92	85.2	22.66	318.4	5.58	1.78	1.14	4.42	671.534	9.3	16.8	6.9	1	95.285	0	0	0	0
1	44	1	1	1	0	29.07	137	87	5.6	55.7	6.40499	299.1	3.94	2.53	0.71	2.48	580.09	6.88	18.93	11.9	1	119.846	0	0	0	0
1	44	1	1	0	0	20.43	127	77	6.6	76.1	0.301371	305.1	4.85	10.57	0.71	2.12	428.857	6.35	14.2	6.5	1	109.227	0	0	0	0
1	44	1	1	0	0	30	140	78	4.68	69.8	11.3547	301.2	3.99	2.28	0.54	2.76	411.984	17.1	29.12	11.4	1	121.256	0	0	0	0
1	44	1	0	1	0	22.31	130	85	6.34	70.2	19.6	305.8	4.55	1.68	0.83	2.78	606.303	8.53	20.54	5.9	1	120.422	1	0	0	0
1	44	3	1	1	0	23.05	111	79	6.4	78	2.00727	313.1	4.14	7.64	0.54	1.64	519.01	10.06	17.49	8.2	1	106.019	0	0	0	0
1	44	3	1	1	0	20.9	118	71	4.66	63.6	22.66	300.8	5.57	1.96	0.97	4.19	641.046	5.22	16.6	6.5	1	135.69	0	0	0	0
1	44	4	1	1	0	25.6	135	86	4.26	70.2	21.75	316.9	4.91	3.41	0.95	3.1	971.721	7.34	19.49	9.4	1	120.422	0	0	0	0
1	44	4	1	1	0	23.31	128	68	6.83	64.9	4.1	320.4	5.93	8.07	0.82	2.23	761.133	12.86	19.2	11	1	132.41	0	0	0	0
1	44	5	1	0	0	24.17	119	75	4.13	46.3	8.02	279.1	5.78	10.32	0.77	2.46	568.095	15.49	21.77	10	1	129.306	0	0	0	0
1	44	5	1	0	0	27.29	106	59	3.86	63.3	22.66	306.7	5.35	2.97	1.01	3.62	624.608	7.8	17.61	7.8	1	136.467	0	0	0	0
1	44	5	1	1	0	26.84	127	82	4	49.6	6.3	288.8	4.08	5.24	1.18	1.45	537.56	8.32	13.89	6.4	1	125.698	0	0	0	0
1	45	0.5	1	1	0	27.34	140	90	3.53	67.8	12.45	308.3	3.48	1.56	0.73	2.2	334.639	4.82	14.22	9.7	1	124.715	0	0	0	0
1	45	0.5	1	1	0	35.16	110	70	3.8	63	5.70622	324.7	4.16	9.67	0.65	1.16	631.16	13.43	21.06	7.8	1	136.293	1	0	0	0
1	45	0	0	0	0	26.04	126	81	3.73	66.3	2.76	279.7	5.78	2.53	1.01	4.12	443.078	11.03	23.68	8.5	1	128.134	1	0	0	0
1	45	0	0	0	0	21.64	132	78	5.3	69.7	7.87	315.7	4.12	3.46	0.9	2.61	319.315	10.11	20.31	10.3	1	120.617	0	0	0	0
1	45	1	0	1	1	25.34	136	84	5.28	56.1	5.55	313	4.11	2.07	0.86	2.72	745.198	11.46	19.54	9	1	118.658	1	1	0	0
1	45	1	0	0	0	27.18	120	80	6.6	66.5	22.66	276.6	4.5	1.26	1.19	3.2	477.824	10.76	24.92	9.7	1	127.669	0	0	0	0
1	45	1	1	1	1	24.17	113	69	6.63	66.2	7.06	314.3	5.28	2.93	1.06	3.69	282.149	8.55	19.54	10.4	1	128.368	1	0	0	0
1	45	1	1	1	0	30.86	120	86	5.34	91.7	22.66	318.8	4.17	2.32	1.04	2.51	258.5	7.36	14.78	7.4	2	86.5707	0	0	0	0
1	45	1	1	1	0	23.92	140	98	4.7	65	13.76	293.9	3.45	0.74	1.12	2.22	555.852	13.68	20.65	10	1	131.239	1	0	0	0
1	45	10	1	0	0	24.97	142	78	3.72	76.8	9.2	284.7	4.59	2.98	0.93	2.87	521.659	6.01	12.54	7.1	1	107.269	1	1	0	0
1	45	12	0	0	1	22.5	121	72	4.08	80.6	22.66	298.4	4.51	2.9	0.83	2.5	505.875	7.76	20.65	7.4	1	101.185	1	0	0	0
1	45	12	1	1	0	31.64	121	80	6.88	61	7.48	284.8	4.38	4.55	0.84	2.52	526.595	5.85	18.39	6	1	114.644	0	0	0	0
1	45	2	0	0	0	23.34	120	75	6.41	73.8	6.92	320.4	4.68	0.88	1.38	3.08	591.587	5.58	25.05	8.2	1	112.563	0	0	0	0
1	45	2	0	1	1	24.03	115	74	5.63	66.2	4.62	301	4.16	1.85	0.8	3.11	633.512	6.83	13.4	6.3	1	128.368	0	0	0	0
1	45	3	0	1	1	32.27	130	80	5.94	65.2	2.08	298.3	4.18	1.75	0.98	2.84	679.221	11.31	22.75	10.9	1	130.752	1	0	0	0
1	45	4	1	0	1	22.64	134	85	6.18	63.6	6.44	277.2	6.02	1.41	1.65	4.21	638.077	5.8	12.7	8.3	1	134.74	1	0	0	0
1	45	6	0	0	0	26.4	115	84	3.31	59.4	10.9	308.6	2.96	1.45	0.38	2	528.356	4.07	9.81	6.6	1	115.903	1	0	0	0
1	45	6	1	1	0	23.44	122	75	5.6	82	14.1258	298.4	4.04	0.87	0.89	2.43	638.49	7.31	12.87	8	1	99.1002	1	0	0	0
1	45	6	1	0	1	26.49	122	73	5.25	59.7	7.03	319.3	4.67	3.48	0.99	1.42	577.177	7.54	18.7	10.2	1	115.663	1	0	0	0
1	46	0.25	0	0	1	22.86	120	75	5.23	66.1	4.77	290.7	5.53	1.19	1.36	4.01	430.969	8.22	25.38	9.9	1	127.703	0	0	0	0
1	46	1	0	0	0	25.15	170	100	3.4	66	10.11	299	5.94	1.17	1	4	604.13	10.27	23.37	12.3	1	127.937	0	0	0	0
1	46	10	0	0	0	28.71	145	95	4.52	83.5	2.7306	277.6	4.42	1.14	1.13	2.43	570.636	5.61	13.76	8	1	96.2732	0	0	0	0
1	46	4	1	0	0	24.65	111	66	6.6	62.6	3.57	323.8	4.34	0.86	0.76	3.36	624.768	4.63	9.51	5.9	1	136.385	0	0	0	0
1	46	5	1	1	0	28.84	120	70	3.96	66.2	5.9745	272.4	4.2	1.06	0.95	3.15	413.319	4.14	7.72	5.8	1	127.47	1	0	0	0
1	46	6	1	1	0	25.59	172	102	7.9	107.1	3.81	292.6	4.58	1.3	1.03	3.45	500.281	6.09	11.14	7.7	2	71.254	1	0	0	0
1	46	7	1	1	0	19.72	110	90	4.22	69.3	25.0597	301.9	3.53	1.66	1	2.2	535.439	8.6	11.59	8.8	1	120.609	0	0	0	0
1	46	7	1	1	0	23.8	120	80	7.05	77.1	22.66	314.8	4.14	1.13	1.2	2.41	448.064	5.75	16.1	6.4	1	106.017	1	0	0	0
1	46	8	1	0	0	24.97	110	62	3.85	64.3	1.21	315.2	4.65	2.96	0.91	2.72	698.454	6.6	13.76	8.1	1	132.038	0	1	0	0
1	47	0.25	0	1	1	22.27	119	74	3.9	76.9	22.66	274.2	5.42	3.3	0.89	3.49	558.067	8.42	16.88	11.7	1	105.606	0	0	0	0
1	47	0.5	0	0	0	33.87	110	71	4.07	73.2	0.0373636	307.4	2.73	0.71	1.13	1.06	569.491	3.12	13.52	10	1	112.093	1	0	0	0
1	47	1	1	1	0	34.6	96	57	4.3	48.9	14.8975	321.8	5.93	0.96	1.71	3.42	489.37	19.24	29.72	12.5	1	123.798	0	0	0	0
1	47	1	1	1	0	21.87	123	83	5.58	88.9	6.42865	292.3	5.83	2.59	1.08	3.61	649.087	4.85	14.91	8.2	2	88.624	1	0	0	0
1	47	10	0	0	0	21.88	150	100	5.78	65.6	15.41	281.2	4.82	3.72	1.01	2.57	722.876	8.4	15.35	9.1	1	127.979	1	0	0	0
1	47	2	1	1	0	25.24	126	70	5.05	85.3	20.1598	299.5	3.96	1.32	1.06	2.59	731.956	4.26	8.74	6.6	2	93.1658	0	0	0	0
1	47	4	1	0	0	26.16	107	68	5.27	84.8	6.92	294	4.03	1.32	0.95	2.94	316.508	12.94	23.68	11.9	1	93.8303	0	1	0	0
1	47	5	0	1	1	20.83	128	90	6.64	84.1	23.77	297.4	5.26	4.64	1.02	2.41	895.931	6.82	12.4	6.5	1	94.7754	1	0	0	0
1	47	8	0	0	0	22.31	115	71	5.83	74.4	1.84	281	5.4	1.76	1.21	3.69	481.484	7.93	21.69	6.4	1	109.911	0	0	0	1
1	47	8	1	0	0	22.85	120	78	4.84	64.6	23.9537	301.4	4.43	2.55	0.85	2.75	387.486	8.54	15.51	9.5	1	130.378	1	1	0	0
1	48	0.25	0	0	0	22.67	138	70	6.9	64.5	22.66	295.3	2.02	0.6	0.8	1.08	616.72	4.16	14.89	7.6	1	129.708	0	1	0	0
1	48	0.25	1	1	0	26.04	129	86	5	58	19.5378	285.7	5.21	1.34	1.02	3.54	378.22	17.25	27.08	12.3	1	114.604	1	0	0	0
1	48	1	1	0	0	26.67	119	65	6.1	67	15.2579	282.9	3.28	2.55	0.81	1.63	631.34	6.63	13.7	7.8	1	123.879	0	0	0	0
1	48	1	0	0	0	24.03	120	70	3.94	72.3	6.3	317.6	5.92	3.1	1.15	3.94	770.686	7.14	8.84	5.6	1	112.986	0	0	0	0
1	48	10	1	0	0	24.45	110	62	5.42	54.2	7.29	273.5	6.21	0.57	1.01	2.57	477.508	14.31	20.59	11.5	1	117.841	1	1	0	0
1	48	13	1	1	1	25.34	125	71	8.8	75.1	2.2	295.7	4.01	2.31	0.78	2.48	597.335	14.97	17.2	10.1	1	107.913	0	0	0	0
1	48	13	1	0	0	26.04	126	74	5.04	66.6	5.71	315.8	3.81	0.97	1.2	2.39	703.983	16.43	22.83	12.7	1	124.779	0	0	0	0
1	48	14	0	1	0	22.89	119	78	6.2	70	2.5	283.8	6.01	6.73	0.78	2.7	560.36	12.17	18.91	7.7	1	117.49	0	0	0	0
1	48	4	1	1	0	25.3	140	74	8.84	67.7	2.38	323.1	4.67	0.84	1.61	2.83	298.538	12.34	22.54	10.2	1	122.332	0	0	0	0
1	48	4	0	0	0	29.02	115	74	4.7	89	22.66	325.8	5.16	1.12	1.36	2.93	147.89	5.36	9.18	5.4	1	87.8841	0	1	0	0
1	48	5	1	1	0	22.66	142	92	5.8	55	21.3685	296.3	5.03	0.93	0.96	3.52	538.82	5.52	17.1	7.4	1	117.133	1	0	0	0
1	48	6	0	0	0	24.24	110	78	4.6	84	5.97	270.9	3.13	0.86	1.11	1.68	306.246	4.12	7.27	5.8	1	94.2474	1	0	0	0
1	48	8	1	0	1	24.34	135	82	4.32	60.4	29.4369	278.2	4.04	2.14	1.12	2.5	538.252	3.33	8.65	5.5	1	112.71	0	0	0	0
1	49	0.25	0	1	0	25.91	108	70	5.12	61.6	13.8095	286.1	4.94	1.45	1.13	3.38	1066.28	14.24	24.11	12.2	1	111.02	0	0	0	0
1	49	0.25	1	1	0	20.83	125	80	8.16	83.2	5.53	271.2	4.01	1.22	1.1	2.42	326.947	4.89	8.5	6.3	1	94.6767	1	0	0	0
1	49	0.4	1	0	0	22.77	108	71	4.99	68.6	28.9	274.9	4.13	1.65	1.13	2.54	671.466	12.68	19.66	10.6	1	119.552	0	0	0	0
1	49	0	1	1	0	26.35	87	59	6.3	73.2	22.66	320.8	5.11	1.74	0.94	2.86	249.17	9.07	23.22	11.7	1	110.53	1	0	0	0
1	49	0	1	0	1	20.81	130	86	5.9	66.9	14.5315	292.6	4.86	3.89	0.85	3	618.471	10.75	25.8	9.5	1	123.234	0	0	0	0
1	49	1	0	0	0	24.03	136	84	7.54	72	11.7856	295.5	5.03	2.16	0.92	3.38	943.569	5.57	8.97	6.3	1	112.761	1	0	0	0
1	49	10	1	0	0	20.03	121	77	6.55	88.6	8.05	281	5.35	1.7	1.44	3.14	595.634	8.41	19.89	9.5	2	87.7455	1	0	0	0
1	49	10	1	0	0	28.04	130	80	8.67	71.9	7.45	296.5	6	7.34	0.6	3.39	595.578	11.41	26.5	11.5	1	112.95	0	0	0	0
1	49	15	0	0	0	21.67	125	80	5.81	65.5	18.0624	312.4	5.04	11.06	0.74	1.93	331.382	16.41	22.38	9.6	1	126.426	1	0	0	0
1	49	2	0	0	0	22.04	110	80	6.52	78.6	6.32	311.8	4.56	0.76	1.16	3.18	474.619	3.62	7.44	5.5	1	101.416	0	0	0	0
1	49	2	1	1	0	23.88	130	89	5.6	52.8	12.55	301.4	5.04	1.47	0.92	3.9	724.48	7.49	23.38	9.1	1	118.281	1	0	0	0
1	49	20	1	1	1	21.83	145	95	5.51	63.9	22.66	325.9	4.46	1.02	0.96	3.05	338.894	5.87	14.46	6.8	1	130.263	0	0	0	0
1	49	3	1	1	1	30.12	116	66	4.5	84.1	10.54	283.5	7.11	0.96	1.09	5.74	696.957	9.68	18.93	7.4	2	93.4531	1	1	0	0
1	49	3	1	1	0	26.09	133	92	6.85	69.8	3.13916	279.9	5.78	1.92	1.22	3.82	637.256	9.69	19.24	7.9	1	117.071	0	0	0	0
1	49	3	1	0	0	26.67	120	85	6.22	83.6	8.46378	315.7	4.74	4.44	0.89	2.06	437.542	12.22	17.3	8.6	2	94.1293	0	0	0	1
1	49	4	0	0	0	30.76	131	83	7.9	80	5.03573	277.3	4.93	2.19	0.87	2.85	253.57	8.13	17.73	8.7	1	99.2742	0	0	0	0
1	49	5	1	0	0	27.24	140	86	5.41	70.9	22.66	294.2	4.26	0.67	0.88	3.01	473.363	5.08	11.65	7.3	1	114.879	0	0	0	0
1	49	6	0	1	0	22.04	111	68	4.51	66.7	6.04	273.6	5.34	1.46	1.1	3.67	462.193	13.19	25.84	10.7	1	123.681	1	0	0	0
1	49	6	0	1	0	22.38	120	66	4.66	76.7	3.47	279.4	5.96	1.67	0.94	4.38	431.725	13.58	24.78	9.8	1	104.461	1	0	0	0
1	49	8	1	1	0	25.39	188	105	4.3	56	11.7	311.2	5.57	1.52	0.94	4.21	339.62	13.49	22.86	10.3	1	115.455	1	0	0	0
1	49	8	1	0	0	23.24	140	90	4.28	66.7	7.34733	308.9	4.81	1.55	0.86	3.07	417.875	8.04	13.09	6.4	1	123.681	1	1	0	1
1	50	0.25	0	0	0	30.86	129	84	5.22	84.5	11.9874	314.8	6.42	3.73	1.06	3.53	308.611	4.84	12.49	8.6	2	92.2681	1	0	0	1
1	50	0.4	1	1	0	18.43	108	58	5.76	79.6	16.19	291.6	3.47	0.76	0.87	2.3	452.295	5.97	16.58	7	1	99.1785	0	0	0	1
1	50	0.5	1	0	0	21.09	130	80	5.34	53.6	5.28	310.5	5	3.07	0.63	3.5	620.274	7.45	16.65	9.3	1	116.729	0	0	0	0
1	50	0.5	0	0	0	23.34	113	77	5	72	22.66	277.6	4.93	5.29	1.09	2.23	335.55	6.69	13.6	8.5	1	111.971	0	0	0	0
1	50	0.5	0	0	0	20.55	121	78	3.34	66.9	23.8327	295	5	2.17	0.99	3.63	630.982	7.03	17.25	7.3	1	122.372	1	0	0	0
1	50	0	1	1	0	26.4	139	98	4.21	61.9	13.98	322.4	4.89	3.37	0.92	3.08	323.47	8.27	19.05	7.7	1	134.421	0	0	0	0
1	50	0	1	1	1	25.54	151	103	4.8	80	11.4771	318.3	4.39	2.33	1.24	2.37	1100.39	9.35	17.82	7.9	1	98.5793	1	0	0	0
1	50	1	1	1	1	23.73	130	80	5.09	69.4	16.7674	292.7	4.55	3.3	0.53	2.65	612.704	5.01	12.76	8	1	117.063	0	1	0	0
1	50	1	1	1	0	25.63	136	84	2.6	60.9	12.77	300.1	4.29	1.3	0.78	3.11	344.264	7.66	19.58	11.5	1	110.762	0	0	0	0
1	50	1	1	1	0	27.18	106	68	4.9	56	22.66	286.6	4.13	2.5	0.67	2.69	410.53	12.05	24.39	11.4	1	114.647	1	0	0	0
1	50	1	0	1	0	30.08	125	80	3.69	85	3.4	308.2	5.61	4.51	1.11	2.84	767.098	9.28	16.86	9.2	2	91.6124	1	0	0	0
1	50	10	1	1	0	26.75	140	90	4.04	63.2	4.45	322	5.55	2.87	1.33	2.97	468.788	3.98	12.17	6.5	1	131.085	1	0	0	0
1	50	12	0	0	0	22.86	111	72	4.7	73	22.66	305.7	3.79	3.18	0.92	1.74	553.62	15.36	24.67	9.8	1	110.119	1	0	0	0
1	50	14	1	0	0	23.44	133	87	5.34	77.2	4	305.5	4.05	2.02	1.04	2.39	477.024	8.38	18.94	6.5	2	102.918	1	0	0	0
1	50	2	0	0	0	29.3	130	75	3.97	83.8	19.33	313.5	5.61	3.88	0.98	2.55	652.652	8.57	17.22	8.1	1	93.2008	1	0	0	0
1	50	3	1	1	0	23.44	166	82	8.25	84.6	1.5816	310.6	4.4	1.34	1.12	2.78	596.177	7.25	12.15	9.1	2	92.1363	0	0	0	0
1	50	4	0	0	0	26.99	159	99	4.84	84.1	7.18	305.4	3.95	1.52	0.82	2.63	434.853	10.09	20.86	8.5	1	92.799	1	0	0	0
1	50	5	0	0	0	22.59	111	63	4.84	70.8	22.0468	310.9	3.46	2.94	0.82	1.65	402.265	6.17	14.27	8	1	114.27	0	0	0	0
1	50	7	1	1	0	28.84	123	75	6.28	74.7	10.742	306.7	4.85	2.03	1.18	2.9	660.064	5.67	10.65	5.8	1	107.097	1	0	0	0
1	50	7	1	0	1	25.71	140	90	6.61	73.7	26	303.9	4.27	0.72	0.79	3.17	450.409	7.54	19.88	9.2	1	108.856	1	0	0	1
1	50	8	1	0	1	23.42	110	80	7.25	71.6	20.8722	307.9	5.76	1.67	1.22	3.25	599.203	4.79	9.64	13.4	1	112.728	1	0	0	0
1	51	0.1	1	1	0	24.98	122	66	6.78	114.7	22.66	284.8	3.92	0.78	1.11	2.31	344.35	12.18	22.38	11.1	1	63.3226	0	0	0	0
1	51	0	1	0	0	26.35	114	76	2.5	48	6.95	319.2	3.65	1.05	0.79	2.18	418.78	12.73	22.09	17.3	1	121.29	0	0	0	0
1	51	1	0	0	0	33.3	129	88	6.9	67.4	9.64266	324.8	4.01	0.97	0.8	2.52	308.94	6.28	11.18	8.3	1	120.426	0	0	0	0
1	51	1	1	0	0	20.31	130	80	3.78	60	22.66	309.5	4.56	4.39	0.77	2.46	782.31	8.58	20.32	8.1	1	110.661	0	0	0	0
1	51	17	0	0	1	23.66	200	125	6.8	96.3	11.81	276.7	6.04	1.74	1.43	3.92	302.842	8.16	18.47	7	2	78.2288	0	0	0	0
1	51	2	1	0	0	22.66	119	77	3.17	95.5	3.24	305.1	5.07	2.27	1	3.18	322.734	3.74	10.92	7.5	2	79.0218	0	0	0	0
1	51	3	1	1	0	21.09	135	80	4.95	54.9	15.48	317.7	4.5	2.81	1.18	2.78	753.192	6.5	11.66	5.6	1	114.776	0	0	0	1
1	51	4	1	1	0	24.33	116	59	6.65	63.9	25.83	323.1	5.89	2.06	0.89	4.31	614.518	10.1	20.18	7.9	1	128.446	1	0	0	1
1	51	4	1	1	1	25.78	120	70	6.44	77.3	4.69	309.4	4.57	2.56	1.05	2.66	601.729	3.6	10.89	5.1	1	102.038	0	0	0	0
1	51	5	0	0	0	29.72	130	83	7.13	70.7	22.66	323.9	3.95	1.49	0.9	2.71	469.943	9.04	21.12	9.7	1	113.664	1	0	0	0
1	51	8	0	0	0	27.64	130	85	6	64.4	13.1646	322.2	6	1.05	1.5	3.64	512.1	12.02	25.32	9.8	1	127.241	0	0	0	0
1	51	8	1	1	0	22.66	140	85	6.26	63.1	5.22	285.6	4.8	3.31	0.92	2.59	528.955	14.19	26.85	12	1	130.417	0	0	0	0
1	52	0.1	0	0	0	28.44	120	70	5.15	77.3	22.66	283.1	5.19	1.51	0.97	3.76	406.473	8.57	18.76	11	1	101.324	0	0	0	0
1	52	0	0	0	1	19.95	139	108	7.9	76.3	3.12	299.3	5.02	3.15	1.05	2.83	399.899	11.28	27.86	12.9	1	102.931	1	0	0	0
1	52	1	0	0	0	32.67	130	83	5.2	68.3	13.0369	323.4	4.51	1.51	0.77	3.19	582.947	5.23	16.45	7	1	117.681	1	0	0	0
1	52	14	1	1	1	25.48	140	70	5.44	57.8	14.1	285.5	5.23	2.56	0.92	3.66	647.5	10.82	20.31	9.6	1	111.587	1	0	0	0
1	52	2	1	1	0	25.71	110	80	5.65	57.6	20.87	301	4.53	1.85	0.96	3.18	442.09	9.08	22.48	9	1	111.746	1	0	0	0
1	52	2	1	0	0	26.7	135	85	5.73	68	19.9432	302.3	3.57	3.6	0.7	1.92	870.513	8.41	14.43	9.6	1	118.309	1	0	0	0
1	52	4	0	0	0	19.26	135	80	4.55	54.8	15.7	321.6	3.96	1.95	0.91	2.82	692.55	10.11	18.88	7.8	1	114.058	0	0	0	0
1	52	6	0	0	1	23.83	155	86	5.7	78.2	7.16787	309.8	4.05	3.49	0.94	2.08	534.768	4.02	13.02	5.9	1	99.9155	1	0	0	0
1	53	0	1	1	0	28.52	152	81	4.24	69.6	21.42	281.2	3.67	0.87	0.97	2.45	592.607	12.29	21.42	9	1	114.223	0	0	0	1
1	53	0	1	1	1	25.78	130	80	5.9	75.8	25.37	302.2	4.61	1.47	0.82	3.47	541.861	8.42	15.87	11.7	1	103.027	0	0	0	0
1	53	1	1	1	0	20.94	110	70	3.9	55	9.82948	314.4	3.68	1.06	0.73	2.59	222.49	8.19	18.43	10.6	1	113.09	0	0	0	0
1	53	10	1	0	0	26.04	156	90	3.98	71	3.57	322.6	5.63	1.81	1.24	3.35	435.091	6.46	17.76	7.1	1	111.506	0	0	0	0
1	53	10	0	0	0	21.88	110	89	9.23	63	5.91537	312.7	5.79	1.69	1.25	4.36	489.112	11.11	18.99	11.2	1	128.845	0	0	0	0
1	53	10	0	1	0	23.83	110	70	5.6	71.1	12.6594	298.9	3.8	1.69	0.88	2.44	634.67	19.06	29.26	11.4	1	111.316	0	0	0	0
1	53	10	0	0	1	24.98	128	77	5.34	69.5	2.77	297	6.01	4.34	1.18	3.67	612.81	7.65	14.37	6.6	1	114.422	1	0	0	0
1	53	11	1	1	0	21.72	120	75	4.79	61.8	18.5607	279.6	6.95	2.41	0.96	5.3	648.773	15.55	26.94	11	1	107.8	1	0	0	0
1	53	13	1	1	0	27.06	141	79	5.2	50	7.52509	289.3	5.77	3.73	0.99	3.69	698.35	15.78	24.45	12	1	117.608	0	0	0	1
1	53	13	1	1	0	22.14	148	92	6.3	62.4	25.2014	284.6	3.66	1.04	1.08	2.26	478.45	6.54	11.32	6.6	1	130.344	1	0	0	0
1	53	2	0	0	0	23.53	110	70	7	79	21.9768	315.7	4.76	2.52	0.92	2.72	577.65	6.92	14.57	6.8	1	98.0027	0	0	0	0
1	53	4	0	1	0	22.19	155	112	4.6	69	2.72059	281.3	4.82	1.49	1	2.78	492.4	11.05	20.52	8	1	115.425	1	0	0	0
1	53	4	1	0	0	30.8	135	84	4.2	51.1	12.2987	312.8	6.08	3.04	0.9	4.72	506.103	9.99	20.05	8.4	1	116.561	0	0	0	0
1	53	5	0	1	0	22.27	128	90	6.5	51	22.66	301	4.01	2.87	1.13	2.2	519.47	6.73	8.63	6.3	1	116.655	0	0	0	0
1	53	7	1	0	1	29.24	130	85	4.55	89.9	5.45	288.2	4.39	10.21	0.86	1.42	770.373	6.85	15.53	8.3	2	83.825	1	0	0	0
1	53	7	1	1	1	22.89	120	80	6.7	64.5	19.6	300.6	5.21	3.59	1.01	3.64	549.514	16.49	28.67	10	1	125.231	0	0	0	0
1	53	7	1	1	0	23.66	128	86	4.53	59.6	22.371	320.3	3.95	4.15	1.11	1.7	409.59	8.24	16.13	8.2	1	109.418	1	0	0	0
1	53	9	1	1	0	25.24	130	80	3.31	76.8	5.08	307.5	5.11	2.44	1.13	2.76	610.438	6.81	15.78	6.9	1	101.407	1	0	0	1
1	54	0.1	0	0	1	23.03	130	80	4.9	65	6.36618	279.5	3.87	1.24	0.84	2.46	707	7.54	21.7	11	1	123.199	1	0	0	0
1	54	0.2	1	1	0	29.27	124	76	4.4	62	19.1997	301.1	4.45	1.65	1.01	2.91	482.27	10	18.07	9.2	1	130.442	0	0	0	0
1	54	0.5	1	1	1	27.1	132	84	2.9	57	2.08	275.4	3.2	1.33	0.63	2.1	557.78	12.93	24.95	13	1	110.662	0	0	0	0
1	54	1	1	1	0	21.3	130	66	6.72	60.3	8.22	288	5.54	3.22	0.94	2.98	491.972	6.99	17.74	7.6	1	108.132	0	0	0	0
1	54	1	1	1	0	22.89	133	80	2.6	50	7.65	271.8	3.76	1.47	0.77	2.45	589.45	4.43	4.96	5.9	1	116.785	1	0	0	0
1	54	10	0	1	0	25.64	102	70	3.3	67	10.96	316.1	4.98	1.4	0.84	3.45	566.3	14.98	19.96	9.6	1	118.767	1	0	0	0
1	54	10	1	1	0	28.83	113	76	5.4	42.4	15.946	294	3.91	2.37	1.18	2.13	364.62	10.34	19.96	9	1	124.973	1	0	0	1
1	54	12	0	0	1	34.48	140	90	5.38	57.3	15.5523	275.2	4.48	0.86	1.01	3.36	479.527	9.05	18.89	8.1	1	110.424	0	0	0	0
1	54	12	1	1	0	27.25	132	64	4.19	86.1	22.66	286.3	4.47	3.31	0.94	2.47	532.025	7.44	19.48	6.8	1	87.7	0	0	0	0
1	54	16	0	0	0	19.91	136	78	6.75	46.9	6.2	279.4	4.99	0.85	0.92	2.81	551.715	14.38	20.52	10.7	1	119.898	1	0	0	1
1	54	2	0	0	0	28.96	120	75	3.2	51	18.4009	283.3	5.83	2.45	0.9	3.51	662.51	13.77	31.08	13.5	1	115.838	0	0	0	0
1	54	3	0	0	0	30.36	132	97	4.73	77.6	11.02	307.3	4.07	0.67	1.14	2.63	753.313	4.99	9.13	6.3	1	99.4433	1	0	0	1
1	54	3	0	0	0	20.4	144	76	8.73	67.7	20.5248	304.8	3.88	1.33	1.39	2.14	422.271	8.75	19.78	9.6	1	117.283	1	0	0	1
1	54	4	1	1	0	23.83	120	80	4	56	3.71	315.2	4.83	1.29	0.86	3.64	786.11	12.79	22.69	11.6	1	111.47	1	0	0	0
1	54	5	1	1	0	24.34	135	93	5.8	65	4.63661	325.1	4.6	1.56	0.81	3.1	902.55	12.9	22.26	9.7	1	123.199	1	0	0	0
1	54	5	0	0	0	26.17	136	88	5.6	78	28.1807	276.7	6.18	1.4	0.93	4.41	362.9	9.35	16.57	10	1	98.8271	0	0	0	0
1	54	6	0	0	0	29.59	130	80	4.4	89	4.9	274.4	4.59	5.4	0.89	1.27	522.437	4.89	8.94	6.3	2	84.257	0	0	0	0
1	54	8	1	1	0	24.34	138	95	5.1	59	22.66	274.6	4.69	1.64	1.41	2.33	710.4	8.43	18.43	8.4	1	109.105	0	0	0	0
1	54	8	1	0	1	25.71	112	74	5.62	65.5	5.08	279.9	4.2	1.3	1.52	2.33	476.277	6.75	17.79	10.2	1	122.063	0	0	0	1
1	54	8	0	1	0	26.04	120	80	5.33	76.6	7.66	276.3	6.31	2.7	1	4.58	617.828	9.19	17.58	8.2	1	101.015	1	0	0	0
1	55	0.1	1	1	0	22.07	96	66	5.34	81.9	2.58	281.2	10.13	1.26	0.97	7.41	380.83	13.05	29.28	15.3	1	92.514	0	0	0	0
1	55	0.1	1	0	0	22.64	101	70	3.63	48.3	3.32	279.7	3.81	1.4	0.94	2.61	409.348	12.69	24.69	12.2	1	117.628	1	0	0	0
1	55	0.2	1	1	1	24.67	169	112	3.7	56	13.1107	279	4.79	2.36	0.92	3.13	697.46	7.73	20.12	13.6	1	110.69	0	0	0	0
1	55	0.25	1	1	0	23.63	116	78	3.5	59.6	28.0512	310.9	6.14	1.8	0.84	4.12	647.52	10.89	21.07	14.4	1	107.891	0	0	0	0
1	55	1	1	1	0	30.82	110	70	5.4	79.3	22.66	315	4.41	2.78	0.86	2.14	880.22	17.13	32.17	15	1	96.1937	0	0	0	0
1	55	10	1	1	0	23.73	136	84	4.5	81	22.66	280.5	4.91	2.37	1.18	3.11	337.09	13.18	18.5	7.5	1	93.7582	0	1	0	1
1	55	10	0	1	0	27.64	140	86	4.7	50	26.2491	290.3	4.34	1.02	1.12	2.97	457.58	13.87	22.53	10	1	115.968	0	0	0	0
1	55	10	1	1	1	25.08	120	80	4.83	67.7	4.27	282.3	3.73	3.03	1.06	1.65	450.083	6.7	14.81	6.8	1	116.462	1	0	0	0
1	55	11	0	0	0	25.81	140	77	6.02	68.8	7.80554	279.9	4.76	1.45	1.34	2.56	599.523	6.47	16.21	8.1	1	114.215	1	0	0	0
1	55	13	1	1	1	21.79	141	70	3.92	48.7	12.6	283.3	4.06	1.18	1.19	2.52	462.129	15.57	24.16	9.8	1	117.23	0	0	0	1
1	55	14	1	1	0	26.44	127	67	4.3	34	1.06131	290.2	3.27	1.51	0.84	1.99	366.45	9.52	21.14	7.8	1	135.886	1	0	0	0
1	55	16	0	0	0	24.44	110	70	3.9	77	10.32	293.1	4.56	1.14	0.82	3.01	1097.04	13.07	23.51	8.8	1	99.6783	0	1	0	0
1	55	3	0	1	0	19.69	105	61	4.5	67.1	7.85	309.5	3.96	1.26	1.29	2.56	252.66	6.93	9.68	6.3	1	117.723	0	0	0	0
1	55	3	0	0	0	20.58	149	86	5.58	63.7	25.69	274.9	5.01	1.48	0.83	3.73	702.393	9.77	16.05	11.9	1	125.361	1	0	0	0
1	55	4	1	1	0	23.71	115	75	5.8	54	6.51	280.8	5.6	6.12	0.82	2.35	676.34	10.56	23.74	9.2	1	112.357	1	0	0	0
1	55	4	0	0	0	22.6	144	78	3.27	44.1	3.34	280.8	4.7	2.13	1.07	3.2	467.023	4.26	11.35	6.5	1	122.109	0	0	0	1
1	55	4	1	1	0	25.64	125	80	5.58	92.3	13.09	289.8	5.52	3.28	1.1	3.33	665.429	5.95	18.84	7.9	2	80.0643	0	0	0	0
1	55	6	1	1	0	27.89	148	88	3.66	72.2	7.47	276.7	4.32	1.93	1.03	2.96	470.639	2.78	13.71	6	1	107.745	0	0	0	0
1	55	6	1	1	0	23.83	130	85	7.7	227.1	55.26	299.1	6.56	2.36	0.72	3.94	162.35	13.16	30.45	13.9	4	26.9588	0	1	1	0
1	55	7	1	0	0	25.1	121	77	6.17	88.8	11.5421	282.3	2.55	1.34	0.69	1.44	131.21	6.65	13.8	8	1	83.8951	1	0	0	0
1	55	8	0	0	1	25.33	127	72	4.99	73.8	9.47	278.8	4.57	1.27	1.06	3.05	576.537	8.73	20.33	8.5	1	104.927	1	1	0	0
1	55	8	1	0	1	22.41	117	82	8.42	69.8	3.98	300.9	5.42	1.78	0.94	4.22	588.424	13.75	26.94	11.4	1	112.24	0	0	0	0
1	55	8	1	0	0	23.31	133	74	4.3	60	3.99	296.5	3.41	1.8	0.54	2.17	583.86	12.85	21.97	9.6	1	107.595	0	0	0	0
1	56	0	1	0	1	25.33	120	80	4.33	78.5	4.85	322.6	4.48	0.93	1.19	3.19	522.295	8.03	15.23	7.7	1	96.6985	1	0	0	0
1	56	1	1	0	1	34.85	116	69	4.93	65.1	5.12	282.3	3.36	0.7	0.88	2.51	322.684	9.07	21.29	8.3	1	121.254	0	0	0	0
1	56	10	0	0	0	23.24	130	80	4.27	80.4	6.24917	284.7	3.78	2.68	0.86	2.09	715.11	8	13.2	5.6	1	93.9426	1	0	0	0
1	56	10	1	0	0	32.46	115	75	6.13	70.7	22.66	286.8	5.02	3.54	0.89	2.93	431.941	13.01	21.64	12.5	1	109.741	0	0	0	0
1	56	10	0	0	0	24.67	160	90	5.9	76	23.77	314.2	3.67	1.05	0.95	2.03	479.03	12.19	21.85	10	1	100.557	0	0	0	0
1	56	11	0	1	0	20.2	130	80	4.65	61.7	5.12	273.1	5.53	2.87	0.76	3.76	628.294	8.68	15.42	8.7	1	105.622	1	0	0	0
1	56	12	0	1	0	24.65	140	96	5.32	67.5	9.26	286.4	3.32	1.56	1.21	1.86	455.767	5.43	14.37	6.9	1	116.062	0	0	0	0
1	56	13	1	1	0	19.43	141	94	5.6	63	11.1514	302.8	4.86	2.17	1.09	2.69	462.94	6.83	12.21	5.5	1	126.158	1	0	0	0
1	56	15	0	1	0	25.1	126	78	4.7	71.2	6.30741	312.9	5.96	1.63	1.17	3.88	780.79	8.61	17.76	8.3	1	108.81	1	0	0	0
1	56	18	0	1	0	23.11	102	65	5.3	68.7	4.47	303.5	5.73	0.98	1.28	3.64	379.41	13.21	23.24	10.3	1	113.615	1	0	0	1
1	56	18	0	1	0	20.06	142	82	6.4	85	24.8232	315.9	3.52	0.81	1.1	2.14	703.08	5.46	16.57	8.3	1	87.8313	0	0	0	0
1	56	2	0	1	0	23.73	130	80	5.53	94	11.07	290.1	4.73	2.42	0.76	3.09	211.125	9.95	17.38	9.4	2	77.7688	0	1	0	0
1	56	20	0	0	0	26.84	90	62	4.8	79.9	18.1159	313.9	6.09	4.24	1.32	3.5	803.15	14.39	24.67	10.2	1	94.6538	0	0	0	0
1	56	3	1	1	0	28.04	124	75	5.6	83	3.13916	303.5	4.7	1.39	0.89	2.89	575	14.03	23.48	10.4	1	90.3965	0	0	0	0
1	56	5	1	0	0	20.96	118	66	7.74	78.1	6.68	284	5.69	1.25	1.16	4.28	395.845	14.99	23.27	8.5	2	97.2976	1	0	0	0
1	56	6	1	1	0	18.03	118	79	3.7	68.5	3.1	271.8	4.05	2.21	1.28	1.6	1317.6	5.91	16.95	6.4	1	114.016	1	0	0	0
1	56	6	0	0	0	26.71	125	80	3.79	58.4	5.98	311.6	5.81	0.77	1.76	4.04	237.518	5.08	18.38	7.3	1	108.036	1	0	0	0
1	56	8	1	1	0	24.97	130	70	7.19	78.9	3.75	312.2	5.98	4.97	0.92	2	485.772	7.55	18.75	6.8	1	96.1061	1	0	0	0
1	57	0.1	0	0	0	25.89	126	86	6.9	68	13.52	279.7	4.91	1.73	0.93	3.21	529.97	8.78	16.42	10.7	1	114.225	0	0	0	0
1	57	0.25	0	1	0	22.1	152	94	6.8	61	11.33	278.6	5.39	5.82	1.11	2.73	283.418	9.35	18.57	10.1	1	105.376	0	0	0	0
1	57	0.25	1	1	0	27.34	162	100	5.2	94.8	11.95	316.8	4.62	1.48	1	3.55	326.733	4.32	16.32	6.7	2	76.4372	1	1	0	0
1	57	1	1	1	0	26.84	120	80	5.99	89.1	5.96	288.9	4.89	2.33	0.95	3.18	443.233	5.46	11.29	6.7	2	82.388	1	0	0	0
1	57	10	1	1	0	20.83	131	74	5	84	23.2	325.8	4.62	1.53	0.8	3.15	393.71	11	19.17	10.3	1	88.4734	0	0	0	1
1	57	15	0	1	0	24.44	120	70	5.65	92.5	28.97	302.1	4.06	1.83	1.04	2.4	339.985	21.88	28.24	12.6	2	78.741	1	1	0	0
1	57	2	1	1	1	24.46	133	73	4.56	55.9	6.7	302.5	5.73	3.54	0.81	3.78	687.142	8.51	20.73	8	1	109.226	0	0	0	0
1	57	20	0	0	0	27.18	174	89	5.06	90.7	3.47	314.3	6.58	0.9	1.52	4.43	492.756	7	21.29	7.9	2	80.6342	0	0	0	1
1	57	6	0	0	0	24.52	110	70	5.8	71	8.87	322	5.03	0.83	1.38	3	844.39	7.3	13.58	6.8	1	108.416	0	0	0	0
1	57	6	1	1	0	30.04	136	80	5.26	57.7	2.48	313.1	3.92	2.32	0.7	2.42	572.75	6.51	17.56	8.5	1	107.812	1	0	0	0
1	57	7	0	0	1	22.64	120	80	5.8	82	2.43	302.1	3.88	1.07	1.06	2.42	193.636	6.06	16.94	5.6	1	91.0889	0	1	0	0
1	57	8	0	1	0	25.91	130	80	3.89	54.9	23.63	307.3	5.96	2.45	0.92	4.21	617.093	9.86	19.71	9.4	1	110.039	1	0	0	0
1	58	1	1	0	0	25.4	110	72	5	77	9.57	317.7	5.41	1.38	1.22	3.25	383.25	4.54	10.08	5.3	1	97.5996	0	0	0	1
1	58	10	0	0	1	29.55	160	90	6.31	78.8	28.5094	295.9	4.78	3.46	0.94	2.85	801.17	8.48	19.65	8.9	1	94.9107	0	0	0	0
1	58	10	1	1	0	24.88	110	70	7.9	98	22.66	312.4	4.16	1.32	0.98	2.35	249.64	8.72	19.6	8.7	1	72.9161	1	0	0	0
1	58	11	0	0	0	22.67	149	93	3.99	76.9	7.80554	324	6.86	5.8	1.3	3.34	500.104	5.41	19.42	6.6	1	97.7531	1	0	0	0
1	58	14	0	1	0	26.48	142	92	6.1	72	5.9745	325.3	3.33	0.98	0.83	2.22	704.32	4.31	17.4	6.5	1	105.852	1	0	0	0
1	58	15	0	0	1	28.89	119	60	7.19	80.9	3.29	271.7	4.94	0.43	1.37	3.19	262.569	5.14	8.93	5.6	2	91.9403	0	0	0	0
1	58	2	1	0	0	20.51	159	95	4.07	68.9	4.73	301.5	5.76	2.35	1.03	3.48	518.07	7.62	21.22	9.8	1	111.637	0	0	0	0
1	58	2	1	1	0	23.73	125	90	3.62	71.3	5.57372	305.3	5.72	1.82	0.91	4	555.609	5.1	9.8	5.6	1	107.11	0	0	0	0
1	58	20	0	0	1	30.8	156	89	4.36	92.3	22.66	278.1	4.54	1.42	1.02	3.09	216.444	4.02	19.64	5.8	2	78.3947	1	0	0	1
1	58	3	0	0	1	21.93	136	79	6.55	81	5.21	297.6	3.38	1.4	0.75	2.18	422.261	12.04	18.58	11.1	1	91.8031	0	0	0	1
1	58	7	1	1	1	24.61	107	77	6.49	91.1	12.2	323.3	3.93	1.73	0.92	2.57	503.139	8.54	18.67	9.3	2	79.6449	1	0	0	0
1	59	0.25	1	0	0	27.39	119	85	5.66	62.5	21.75	271.9	5.26	1.3	0.97	3.97	102.493	13.31	22.81	13.3	1	124.723	1	1	0	0
1	59	0.5	0	1	0	25.22	129	92	6.4	111.4	6.33	325.3	2.86	1.07	1.2	1.34	226.27	7.52	15.84	12.5	1	62.0127	1	0	0	1
1	59	10	0	0	0	23.73	97	62	6.44	59.5	22.66	280.9	4.69	1.28	0.91	2.71	453.908	5.88	14.75	7.8	1	104.975	0	0	0	0
1	59	11	1	0	1	23.92	110	57	7.35	64.3	24	282.2	5.21	1.37	0.97	3.89	628.849	4.9	14.11	7.4	1	120.514	0	0	0	0
1	59	14	0	0	0	21.91	130	80	6.68	77.8	3.7	294.8	4.44	4.8	0.72	1.75	582.395	11.08	18.69	7.7	1	95.7129	0	0	0	0
1	59	2	0	1	0	21.36	122	80	5.5	68	9.77497	305.6	7.05	1.82	1.54	4.35	325.09	10.48	17.34	12	1	112.632	0	0	0	0
1	59	20	0	0	0	25.21	100	60	6.75	96.4	29.7735	302.8	7.01	3.48	1.26	4.9	705.529	15.57	32.01	15.6	2	73.8611	0	1	0	0
1	59	3	1	0	1	26.71	130	80	6.21	79	22.66	276.9	5.61	2.34	1.05	3.08	546.573	5.78	16.73	8	2	93.958	0	0	0	1
1	59	8	1	0	0	37.7	186	69	4.75	67.8	25.69	325.9	4.31	0.4	0.62	3.21	628.533	5.9	15.77	6.4	1	113.034	1	1	0	0
1	60	0.1	0	0	0	20.03	153	87	4.81	119.4	22.66	275.5	4.85	1.73	1.49	2.96	193.719	7.94	18.7	7.5	3	56.626	1	0	1	0
1	60	0.25	0	0	0	23.78	143	76	6.31	73.9	7.14	321.3	4.74	1.2	0.84	3.58	337.013	13.53	29.11	7	1	101.14	1	0	0	0
1	60	1	0	1	0	22.48	125	76	7.5	82.5	12.6594	282.8	4.12	0.8	1.44	2.47	382.56	6.73	11.74	6.6	1	88.5363	1	0	0	0
1	60	10	0	1	0	29.03	110	70	7.17	71.5	2.74	296	5.99	0.77	1.37	3.88	220.748	5	8.39	6	1	105.259	0	0	0	0
1	60	10	1	1	0	26.64	127	82	4.79	70.9	17.9	298.1	3.89	2.53	0.62	2.25	659.578	6.99	12.03	8.7	1	106.337	1	0	0	0
1	60	13	1	0	0	25.28	125	82	4.5	61	22.66	297.4	5.59	4.65	0.79	3.46	495.21	11.26	21.47	9.6	1	103.178	1	0	0	0
1	60	14	1	1	0	26.37	124	82	7.9	75	22.66	314.5	4.24	0.78	1.23	2.6	516.87	5.29	9.79	5.7	1	99.3493	1	0	0	0
1	60	15	1	0	0	24.03	121	72	6.7	67	23.8837	306.2	3.28	2.16	0.66	1.69	330.84	9.06	19.14	10.6	1	113.865	0	0	0	0
1	60	2	0	0	1	27.7	116	86	5.59	77.1	25.69	283.4	4.59	1.16	1.39	2.06	575.99	4.52	15.84	6.7	1	96.0871	0	0	0	0
1	60	2	0	0	0	17.29	140	90	6.37	54	3.99	291.4	4.18	1.68	0.67	2.95	753.16	8.39	22.44	12.2	1	108.479	0	0	0	0
1	60	20	1	1	1	21.64	107	60	6	85.7	8.44	283.4	3.03	2.97	1.07	1.18	597.139	4.66	19.63	5.4	2	84.5552	0	0	0	1
1	60	3	0	0	0	25.23	131	80	5.6	65.5	16.9834	284.7	4.13	1.72	0.86	2.46	282.14	9.42	14.49	8	1	117.025	0	0	0	0
1	60	6	1	1	1	22.03	125	82	4.39	49.4	7.68	284.7	4.53	4.87	0.83	1.7	343.676	6.18	16.6	7.1	1	112.522	0	0	0	0
1	61	0.25	0	0	0	31.65	156	100	3.79	67.5	22.66	298	6.18	2.15	1.09	4.32	278.378	7	17.8	7.1	1	112.056	1	0	0	0
1	61	10	1	1	0	22.27	148	80	4.16	73.5	5.9	270.1	3.43	1.44	1.35	1.65	563.621	6.13	14.61	6.1	1	101.093	0	0	0	1
1	61	10	0	0	1	28.65	116	77	4.49	73.4	2.63	319.2	5.16	2.75	1.94	2.24	481.452	3.73	10.41	6.3	1	101.26	0	0	0	0
1	61	12	1	0	0	22.04	130	80	8.65	90.8	22.66	312.6	7.36	2.79	1.13	4.57	846.075	8.22	25.28	11.7	2	78.2956	0	1	0	1
1	61	13	0	1	0	27.34	118	60	6.64	85.7	3.99	272.4	3.26	0.43	1.5	1.14	517.949	5.14	16.95	6.4	2	83.9633	1	0	0	1
1	61	16	0	0	0	23.24	120	80	5.59	77.1	25.69	283.4	4.59	1.16	1.39	2.43	423.599	4.52	15.84	6.7	1	95.4145	0	0	0	0
1	61	16	1	0	0	23.83	144	74	4.93	80.9	6.88	284.8	3.07	0.62	1.06	1.67	465.827	5.97	13.52	7.2	1	90.023	0	0	0	0
1	61	20	1	1	1	26.35	148	80	5.17	85	0.319734	293.9	6.45	3.08	1.08	4.63	526.501	8.48	20.9	9.7	2	84.8	1	1	0	1
1	61	5	0	1	0	21.34	138	74	4.83	74.3	21.5811	294.6	4.76	3.37	0.89	2.86	180.781	5.96	12.47	6.1	1	99.7787	0	0	0	1
1	61	5	1	0	0	22.04	141	79	5.6	66	4.97295	287.3	4.5	1.02	1.09	3.17	251.55	9.21	15.33	6.7	1	115.142	0	0	0	0
1	61	5	0	0	0	32.99	140	80	6.77	99.9	15.83	284.6	7.26	2.23	1.3	4.46	585.133	5.99	14.34	6.7	2	69.7571	1	0	0	0
1	61	8	0	0	1	17.91	144	77	4.87	86.3	18.58	323.5	4.89	2.45	1.05	2.95	593.793	7.17	15.88	7.2	1	83.258	0	0	0	0
1	62	0	1	1	0	34.85	102	64	4.72	77.7	2.22	274.7	4.82	1.71	3.4	0.9	308.085	4.28	15.51	6.4	1	93.8628	0	1	0	0
1	62	10	1	1	0	33.77	110	70	5.1	48	16.1239	303.9	4.02	1.02	0.94	2.5	773.11	15.38	28.16	12.1	1	112.271	0	0	0	0
1	62	10	1	1	1	25.71	156	88	10.77	84.7	8.2	312	5.66	2.24	0.98	3.55	550.576	15.09	29.91	10.9	1	84.5671	1	0	0	0
1	62	12	0	0	0	25	120	80	8.61	61.7	4.37	324.3	4.73	0.68	1.5	2.9	669.677	4.36	6.58	5.8	1	101.263	0	0	0	0
1	62	12	1	0	0	24.98	140	70	6.86	71.4	0.450429	286.3	4.57	1.39	1.12	1.95	652.445	14.79	24.64	9	1	103.966	1	0	0	0
1	62	15	0	0	0	28.52	127	70	4.21	68.5	22.66	306.6	2.57	0.75	1.01	1.56	597.552	6.48	15.59	7.5	1	109.311	0	0	0	0
1	62	2	1	0	0	23.03	145	87	10.2	107	21.0427	300.5	5.84	1.57	1.35	3.29	575.984	3.86	13.8	6.7	2	63.7511	1	0	0	0
1	62	3	1	1	0	26.04	114	70	7.15	80.4	1.97	306.7	4.52	0.85	0.91	3.5	655.386	5.89	8.07	5.8	2	90.0654	0	0	0	0
1	62	3	0	1	0	26.04	124	71	6.23	64.6	10.38	281.6	3.34	2.46	0.82	1.57	661.696	15.56	28	10.8	1	117.339	1	0	0	0
1	62	5	1	1	0	29.04	130	80	5.52	60.9	6.5	320.9	4.77	4.29	0.87	1.4	319.474	5.72	11.83	6	1	101.808	1	0	0	0
1	63	1	0	0	0	30.86	130	80	8.7	64	22	315.3	4.61	1.11	0.97	3.26	315.194	7.64	11.11	5.9	1	117.839	1	0	0	0
1	63	1	0	0	1	20.7	135	80	5.73	73	7.26	313	4.06	1.22	1.1	2.91	235.034	8.34	17.47	9	1	100.509	1	0	0	0
1	63	10	1	1	0	28.58	191	108	4.79	59.7	22.66	281.6	5.94	1.7	1.25	4.1	606.148	9.58	19.96	8.6	1	101.925	1	0	0	0
1	63	15	0	0	0	25.32	135	84	8.2	73.8	11.36	294.8	3.72	1.05	0.82	2.37	453.9	9.46	22.79	7.8	1	99.1931	1	0	0	0
1	63	2	1	0	0	34.06	110	80	4.76	76.9	18.8792	322.4	4.61	1.44	0.62	2.75	447.386	6.95	15.32	10	1	94.3793	1	0	0	0
1	63	4	1	0	0	28.12	114	71	5.6	69.4	22.66	300.5	5.62	2.41	0.97	3.55	352.48	8.48	14.73	8.6	1	106.846	1	0	0	0
1	63	6	1	0	0	21.76	167	104	4.22	37.1	4.11641	277.3	5.18	5.07	0.96	3.15	547.946	8.18	15.11	7.8	1	123.935	1	1	0	0
1	63	7	0	0	0	20.45	120	80	6.33	97.9	4.08966	274.1	4.41	0.46	1.24	2.76	490.44	13.89	28.31	9.1	1	70.4864	0	0	0	1
1	63	8	1	0	0	28.2	130	71	4.54	94.5	9.08	309.3	5.24	1.33	1.04	3.62	586.711	7.47	19.35	11.3	2	73.5639	0	0	0	0
1	64	0.1	0	0	0	23.52	136	77	4.4	54.5	11.0468	293	3.85	0.83	1.7	1.76	516.17	6.08	11.71	7.1	1	105.075	0	0	0	0
1	64	0.25	0	0	0	18.6	146	96	6.5	63.1	13.92	272.3	4.84	1.79	0.98	3.15	391.063	8.89	20.09	12	1	119.035	1	0	0	0
1	64	0.6	0	0	0	35.65	130	60	6.73	89.9	11.47	316.7	4.63	2.5	1.09	2.38	584.138	10.97	24.85	9.3	2	77.5917	1	0	0	0
1	64	0	0	0	0	24.61	122	65	4.7	94.1	10.32	317.4	4.46	1.66	1.53	2.6	364.503	6.13	15.75	7.5	2	73.4245	0	0	0	0
1	64	10	1	1	0	30.47	135	70	6.75	99.3	2.18	322.6	5.13	1.47	0.92	3.89	334.178	11.34	21.5	10.4	2	68.8017	0	0	0	1
1	64	10	0	1	0	22.14	104	59	4.9	62	23.2759	280.7	6.17	4.26	1.04	3.14	330.11	9.75	18.03	8.9	1	121.593	0	0	0	0
1	64	10	0	0	0	18.07	158	89	4.35	83.9	20.1598	321.5	3.9	2.09	0.84	2.38	525.289	13.17	26.19	8	2	84.3496	0	0	0	0
1	64	10	0	0	0	30.86	138	82	5.2	54	22.66	279.6	5.53	1.55	1.04	3.49	238.44	13.15	21.43	13	1	105.473	0	0	0	0
1	64	10	0	0	0	26.49	145	75	5.98	83.9	7.36	320.6	4.78	1.94	1.09	3.37	271.997	6.78	15.93	8.2	1	84.3496	0	0	0	0
1	64	10	1	1	0	22.94	141	79	5.5	90	4.86	320.2	4.46	1.34	1.24	2.41	680.11	9.59	17.49	10.2	1	77.4875	0	0	0	0
1	64	10	0	1	0	23.44	148	75	7.6	88.5	13.21	270.6	4.24	3.88	0.85	1.74	427.89	13.32	21.26	10.7	1	79.0782	0	1	0	0
1	64	20	0	1	0	24.03	154	89	6.1	66	22.1717	296.3	4.63	1.65	1.31	2.42	263.47	10.13	20.04	6.2	1	112.741	1	0	0	0
1	64	20	1	0	0	29.69	127	71	6.48	84.8	22.66	296.4	4.96	1.33	1.54	3.14	409.153	15.39	18.55	8	1	83.2684	1	1	0	0
1	64	5	0	1	0	21.94	156	88	4.4	59	22.1669	305.3	4.18	1.73	1.1	2.28	425.8	7.27	17.47	7.6	1	101.704	1	0	0	0
1	64	8	0	0	0	22.43	144	88	2.66	49.3	7.67	284.4	6.01	2.42	1.49	3.29	605.557	7.49	25.32	8.5	1	109.496	1	0	0	0
1	65	0.2	1	1	0	24.03	152	80	3.6	56	3.80369	308.9	2.34	3	0.65	0.8	664.08	5.99	12.15	8.1	1	103.181	1	1	0	0
1	65	0.5	1	1	0	23.63	114	66	5.8	77	21.9569	289.5	5.03	3.83	0.91	2.73	665.832	7.57	20.38	8.3	1	92.9165	0	0	0	0
1	65	0	0	0	0	29.39	114	70	3.7	50	5.82874	317.9	3.2	0.93	0.82	1.98	471.37	8.24	18.02	9.8	1	108.101	0	0	0	0
1	65	15	0	0	0	24.09	119	73	7.9	84.6	6.75	312	4.05	0.84	1.06	2.6	384.698	4.55	11.74	6.2	2	82.9219	0	0	0	1
1	65	21	0	0	0	21.94	144	82	4.56	84.7	23.91	272.9	4.68	1.23	0.84	3.43	703.554	7.91	26.19	9.3	1	82.8036	1	0	0	0
1	65	8	0	0	0	22.51	145	89	6.06	95.3	9.29103	275.9	5.45	1.86	0.95	3.46	532.392	6.54	16.96	7.8	2	71.8021	0	0	0	0
1	66	10	0	0	0	32.81	122	62	4.8	67	11.36	294.9	4.81	0.96	1	3.3	610.06	8.57	15.21	5.6	1	109.165	0	1	0	0
1	66	10	0	0	0	22.07	149	99	6	62	13.84	272.8	3.48	0.93	1.21	1.89	752.77	7.33	16.08	7	1	119.897	1	0	0	1
1	66	15	0	0	0	27.39	156	76	4.8	70.5	28.5	269.3	4.33	1.28	0.98	2.32	355.253	5.13	18.03	6.5	1	102.648	0	0	0	0
1	66	20	0	0	0	25.39	135	85	3.33	57	23.66	296.6	4.89	3.06	1.02	2.69	515.19	12.07	24.51	9.6	1	101.716	0	0	0	0
1	66	21	0	0	1	19.05	119	56	5.61	68.9	22.66	275.2	2.92	1.35	0.99	1.79	571.75	7.61	17.24	9.4	1	105.536	0	0	0	1
1	66	3	1	0	0	29.64	136	78	5.44	59.6	23.17	295.3	4.79	2.13	0.87	2.72	515.811	8.17	14.16	9.7	1	99.8686	1	0	0	0
1	66	7	1	0	0	30.04	130	70	5.88	81.9	15.61	287.1	3.87	1.3	1.31	2.21	509.984	9.29	15.93	8	2	85.6346	1	0	0	0
1	66	8	1	1	0	33.56	130	84	7.38	61.5	2.53	277.1	3.43	1.09	1.1	2	659.494	6.05	14.35	6.6	1	98.5888	0	0	0	0
1	67	10	0	0	0	21.37	147	79	9.1	87.7	5.67	286.7	4.43	2.13	1.03	2.82	569.755	16.47	25.22	11	2	78.2839	0	0	0	0
1	67	10	0	1	0	24.98	180	73	6.96	85.4	14.69	311.4	5.24	1.39	0.91	3.75	435.269	6.92	19.02	8.7	2	80.84	0	0	0	0
1	67	18	1	1	0	27.56	160	76	5.3	86.3	23.8706	289.6	7.54	1.25	0.96	5.36	249.72	10.6	16.56	12.4	1	79.8218	0	0	0	0
1	67	5	1	0	0	28.23	127	84	5.7	68.9	24.2336	287.9	4.25	1.62	1.06	2.66	511.134	15.64	25.8	10.8	1	104.798	0	0	0	0
1	67	6	0	0	0	24.97	143	60	5.98	128.4	124.54	300	6.93	0.95	1.47	4.55	596.101	8.09	20.57	8	3	49.3746	0	0	1	0
1	67	6	1	1	0	20.96	141	79	3.7	61.7	5.8	274.2	3.55	2.85	0.76	1.95	274.24	6.15	11.69	6.3	1	97.7681	0	0	0	0
1	67	7	0	0	0	22.04	156	90	4.1	81	2.08	279.3	5.37	1.64	1.07	3.34	348.36	10.56	19.72	9.4	1	86.1788	1	1	0	0
1	68	10	0	0	1	28.2	118	74	6.8	68.9	21.75	276.3	4.34	1.85	0.95	2.84	595.49	12.62	25.29	10.9	1	104.064	0	0	0	0
1	68	18	1	1	0	18.42	105	66	6.1	85	22.66	293.3	3.36	4.3	0.73	1.56	361.24	12.13	18.21	11.7	1	80.731	0	0	0	0
1	68	2	1	0	0	29.74	132	74	7.1	85.3	5.2	310.9	6.09	2.4	1	4.44	377.061	9.21	25.57	11.3	1	80.3879	0	0	0	0
1	68	8	1	0	0	22.14	145	68	5.17	65.4	5.88	313.8	5.38	5.61	1.04	1.95	663.638	8.01	15.28	8.2	1	110.834	0	0	0	0
1	68	8	1	1	0	29.41	130	72	6.5	111.4	145.83	291.5	4.63	1.2	1.19	3.26	614.08	6.84	24.19	6.9	3	58.2135	0	0	1	0
1	69	0	0	1	0	22.41	129	76	6.09	117.3	0.450429	322.8	5.41	2.16	1.48	3.41	325.882	13.76	21.53	12.5	3	54.3095	1	0	1	0
1	69	13	1	0	0	19.81	125	81	5.6	74	21.75	310.6	3.6	1.29	0.96	2.1	342.69	8.96	22.08	9	1	94.7886	1	0	0	0
1	70	12	0	0	0	21.5	148	84	6.3	78.2	2.43	311.2	5.59	1.65	0.81	4.24	295.925	5.12	12.31	7.4	2	88.048	0	0	0	0
1	70	18	0	0	0	22.6	150	80	6.8	71.6	7.21353	303.7	5.66	1.14	1.57	3.52	679.887	4.39	21.27	7.9	1	97.9528	0	0	0	0
1	70	18	0	1	0	19.63	152	86	6.3	70	18.37	301.7	3.15	2.17	0.69	1.54	459.75	7.11	11.74	7.4	1	100.666	1	0	0	0
1	70	5	0	1	0	29.64	198	94	5.8	87.3	7.21	306.6	3.74	0.85	1.17	2.15	445.478	5.37	15.66	6	2	77.0762	0	0	0	0
1	71	0.4	0	0	0	30.04	130	80	7.62	98.1	26.19	322.8	7.27	1.42	1.66	4.94	643.055	12.85	27.09	13.4	2	66.4703	1	0	0	1
1	71	15	0	0	0	22.96	130	65	8.29	117.8	55.2614	303.6	5.27	0.69	1.34	3.32	482.319	7.31	14.48	7.7	3	53.2772	0	0	1	0
1	71	20	1	1	0	25.78	122	66	8.22	68.8	28.1807	294.7	4.08	1.11	1.01	2.36	342.25	12.54	27.39	10.6	1	102.073	0	0	0	1
1	71	25	0	0	0	27.12	131	61	5.4	66	22.66	296	4.1	0.99	1.08	2.71	1001.41	12.78	26.76	8.9	1	107.331	1	0	0	0
1	72	0.5	0	0	0	20.06	87	57	7.6	75	9.46472	313.2	3.85	0.83	1.3	2.06	574.33	5.14	11.7	5.8	1	91.3179	0	0	0	0
1	72	11	0	0	0	20.83	109	50	6.62	83.1	8.26	293.4	3.43	0.47	1.02	2.09	395.248	4.1	11.99	7	2	80.6691	0	0	0	0
1	72	20	0	0	0	24.77	129	65	3.1	53.2	11.8485	296.3	3.99	0.66	1.13	2.56	311.11	5.31	10.6	6.8	1	100.323	0	0	0	0
1	72	7	0	0	0	29.38	140	90	3.95	61.7	22.66	269.8	4.98	0.97	1	2.66	527.816	5.84	16.81	7.3	1	94.3938	1	0	0	1
1	73	0.25	0	0	0	25.39	103	58	12.3	160.5	29.31	310.4	7.74	3.04	1.84	4.45	676.319	21.35	31.79	12	3	36.1439	0	0	1	0
1	73	0	0	0	0	27.06	132	66	4.4	79	1.95	320.9	3.85	8.34	1.02	2.4	209.805	4.51	12.79	7.6	1	85.1575	0	0	0	0
1	73	10	0	0	0	25.04	137	77	5.5	48	2.77	282.4	3.38	1.55	0.99	1.88	171.24	7.56	15.76	7.7	1	103.923	1	1	0	1
1	73	10	0	0	0	18.51	135	80	4.96	73.2	8.5	303.8	4.2	1.31	1.09	2.49	794.577	8.34	17.55	7.8	1	93.3814	1	0	0	1
1	73	12	1	1	0	25.59	140	90	5.4	53	4	281.6	6.2	4.9	1.27	3.52	1294.91	12.72	21.62	10.1	1	99.7752	1	0	0	0
1	73	14	0	0	0	21.51	150	80	7.22	89.8	8.91	320.1	5.33	0.75	1.26	3.87	347.136	7.66	20.51	7	2	72.9362	1	0	0	0
1	74	17	0	0	0	26.95	130	76	4.75	98.2	7.26	304.8	3.68	0.83	1.13	2.52	503.638	6.85	19.45	7.7	2	65.0041	0	0	0	0
1	74	3	0	0	0	25.81	130	80	6.39	103.2	14.38	309	2.68	0.86	1.09	1.5	323.51	2.75	14.79	6.4	2	61.216	0	0	0	0
1	74	8	0	0	0	25.3	126	75	7.53	77.2	18.785	281.2	3.57	0.78	1.11	2.43	538.229	6.18	13.61	9.6	1	86.9509	0	0	0	1
1	74	9	0	0	0	22.77	116	67	8.72	150	15.6153	287.5	4.48	2.69	0.86	2.92	645.352	3.15	10.91	6	3	38.9502	1	0	1	0
1	75	14	0	1	0	25.78	110	70	5.8	54	12.9499	323.8	3.81	0.87	1.07	2.3	896.27	12.98	21.1	8.3	1	97.6303	1	0	0	0
1	76	15	0	0	0	26.73	110	70	3.5	73	17.9418	279.4	3.08	0.7	1.02	1.51	381.77	8.82	15.45	7.5	1	91.737	0	1	0	0
1	77	0.3	0	1	0	30.82	144	86	4.1	68.8	3.75	299.7	4.77	1.89	0.72	2.83	543.89	5.91	15.33	7.3	1	97.8604	1	0	0	1
1	77	7	0	0	0	32.81	148	80	6.16	82.2	25.41	308.2	3.87	1.6	0.75	2.47	912.011	6.81	19.16	9.6	2	78.9171	0	0	0	0
1	78	13	0	0	0	26.35	136	62	8.29	76.9	5.55	292.5	4.37	1.91	0.7	2.38	565.147	7.71	16.48	8.4	1	84.9406	0	0	0	0
1	78	2	0	1	0	27.89	161	65	6.3	110	14.2149	279.9	3.31	1.15	0.83	1.94	600.63	10.39	20.52	8.9	3	55.1006	0	0	1	0
1	78	20	0	0	0	29	162	56	4.37	72.7	24	297.8	5.2	1.04	1.73	2.95	640.088	5.64	15.05	6	1	90.9087	0	0	0	0
1	79	0.5	0	0	0	22.04	140	90	4.57	88.4	4.88	314	4.14	1.59	0.84	2.87	287.749	4.21	9.97	7.2	2	71.2671	0	0	0	0
1	80	20	0	0	0	25.78	120	60	8	127	21.75	270.9	3.88	1.67	0.56	2.67	478.41	15.17	27.68	7.9	2	45.6668	0	0	1	0
1	80	20	0	1	0	27.99	140	75	7.2	84.2	22.66	280.4	3.06	1.71	0.88	1.66	678.59	8.36	20.09	8	1	75.0579	1	1	0	1
1	83	20	0	0	0	23.03	128	63	6.5	102.2	16.4981	277.9	3.93	1.03	0.8	2.39	277.26	12.97	20.92	10.2	3	58.1461	0	0	1	0
1	84	0.25	1	1	0	30.04	146	74	4.32	53.4	14.87	284	4.36	0.7	1	3.02	339.152	8.48	17.1	6.9	1	92.0708	1	0	0	1
1	84	0	0	0	0	27.12	140	85	7.88	70.5	2.82578	277.6	4.72	2.21	1.03	3.39	469.08	11.89	22.25	11	1	90.4556	1	0	0	0
1	47	4	0	0	0	24.52	121	72	4.6	61	21.8962	289.9	6.94	6.51	0.99	3.5	724.19	15.3	23.94	10.6	1	113.044	1	0	0	0
1	47	5	1	0	0	29.3	144	86	4.6	57	22.66	271	5.87	4.61	0.98	3.27	384.25	12.14	24.35	10.4	1	116.24	1	0	0	0
1	65	1	0	0	0	24.34	135	72	5.4	66	22.66	317.5	3.96	2.88	0.67	2.14	489.82	8.5	18.31	10.8	1	111.952	0	0	0	0
1	69	10	0	0	0	29	140	66	5.3	104	4.62	295.4	3.16	1.1	0.64	1.84	392.79	7.21	15.3	7.7	1	62.8151	0	0	0	0
1	80	10	0	0	0	36.05	122	79	7.7	102	11.7101	269.2	3.04	1.09	0.84	1.65	415.91	6.48	13.48	8	3	59.5253	0	0	1	0
1	84	20	0	0	0	31.25	130	70	5.7	69.5	4.02	297.7	3.33	1.41	0.69	1.97	213	14.42	19.84	10.6	1	92.0315	0	0	0	1
1	52	0.2	1	0	0	24.75	123	79	5.7	64	29.6519	301.9	5.33	1.14	0.85	3.64	560.29	13.76	23.3	10.2	1	127.306	1	0	0	1
1	52	0.2	1	0	0	23.46	123	79	5.7	64	22.66	301.9	5.33	1.14	0.85	3.64	560.29	13.76	23.3	10.2	1	127.306	1	0	0	1
1	58	1	0	1	0	26.67	130	87	3.2	48	22.66	311.6	3.53	1.02	0.85	2.22	678.01	14.23	26.66	12	1	115.47	0	0	0	0
1	58	1	0	1	0	25.71	130	87	3.2	48	26.2198	311.6	3.53	1.02	0.85	2.22	678.01	14.23	26.66	12	1	115.47	0	0	0	0
1	23	0.25	0	0	0	27.06	115	78	5.58	88	11.6234	321.9	6.64	0.98	1.11	5.53	531.17	9.69	19.48	14.4	1	106.197	0	0	0	0
1	23	0.25	0	0	0	23.51	115	78	5.58	88	21.75	321.9	6.64	0.98	1.11	5.53	531.17	9.69	19.48	13.7	1	106.197	0	0	0	0
1	44	9	1	1	0	24.88	124		7.1	54.5	14.393	317.1	5.65	9.76	0.64	2.04	463.03	10.97	26.25	10.5	1	120.924	1	0	0	0
1	23	5	1	1	1	27.34	100	65	6.2	64.2	4.16	365.5	5.87	2.51	0.86	4.58	951.138	5.29	12.34	14.8	1	155.483	1	0	0	0
1	24	0	0	0	1	31.63	132	66	3.67	53.2	3.99	355.2	4.18	0.7	1.04	2.56	1010.93	5.81	13.63	10.4	1	140.552	0	0	0	0
1	26	0	1	0	0	24.97	135	76	3.8	83.8	26.19	332.9	5.35	1.77	1.04	3.63	836.6	4.9	12.87	6.3	1	110.316	1	0	0	0
1	28	0.25	1	0	1	23.44	115	65	6.21	64.7	4.74	343.4	5.75	2.37	0.88	4.28	405.283	12.35	20.81	9.5	1	148.715	1	0	0	0
1	28	0	0	0	0	28.67	109	66	5.6	83	20.9908	364	4.13	1.63	0.62	2.81	482.31	6.35	14.45	10.2	1	110.046	0	0	0	0
1	28	0	1	1	0	22.77	142	97	3.9	65	21.4244	350.1	4.97	1.05	0.68	3.87	683.76	8.45	19.98	9.9	1	147.886	0	0	0	0
1	29	0.2	1	0	0	25.15	120	70	3.8	59	4.15	340.8	5.78	1.55	0.8	4.01	439.83	8.59	25.01	14.7	1	130.051	1	0	0	0
1	29	0.5	0	0	0	32.46	133	86	5.81	52.8	10.3057	330.7	4.76	2.25	0.87	2.73	657.831	14.19	19.15	11.9	1	136.123	1	0	0	0
1	29	0	0	0	0	24.03	99	62	5.34	69	21.8	358.1	3.84	1.07	1.01	2.7	402.305	11.49	21.26	12.2	1	136.621	0	0	0	0
1	29	5	1	0	0	22.49	128	80	4.72	57.7	7.39	326.3	4.78	6.13	1.15	2.69	507.141	12.76	21.7	10.4	1	131.247	1	0	0	0
1	30	0.5	1	1	1	24.03	128	82	4.47	42	3.75	351.6	4.04	2.33	0.85	2.13	632.706	6.98	21.65	13.4	1	148.5	1	0	0	0
1	30	0	1	0	0	25.56	120	80	4.38	99.8	6.51	348.4	4.3	0.97	0.88	3.14	515.056	7.69	20.56	9.5	2	86.8336	1	0	0	0
1	30	3	0	0	0	26.95	130	80	7.1	66	2.54	333.6	4.9	3.34	0.62	2.77	839.15	11.02	19.84	10.3	1	143.155	1	0	0	0
1	30	6	1	0	1	30.12	134	88	5.55	55.9	7.73	389.1	5.85	4.63	0.94	3.15	655.264	14.64	24.49	13	1	132.037	0	0	0	0
1	31	1	1	0	0	32.03	112	76	5.3	43.9	25.85	386.7	4.57	7.01	0.86	2.01	587.825	12.34	20.19	10.8	1	144.803	1	0	0	0
1	31	7	1	1	1	28.76	131	79	4.78	63.7	8.86	345.5	6.85	11.19	0.97	2.69	508.549	19.82	28.85	13.5	1	148.382	1	0	0	1
1	32	0	0	1	0	28.35	126	90	5.3	61	22.66	326.4	5.88	4.11	0.82	3.62	397.17	11.03	20.2	12.3	1	125.606	0	0	0	0
1	32	2	1	0	1	29.55	148	84	5	62.9	22.66	362.6	5.95	1.25	0.94	4.9	571.775	9.81	14.03	9.6	1	149.612	0	0	0	0
1	33	0.25	1	0	1	19.38	110	65	5.61	61.5	9.6798	366.7	5.31	3.93	0.84	2.89	547.484	12.07	20.17	11.9	1	124.309	1	0	0	0
1	33	0.25	0	0	0	33.43	120	90	3.98	65.7	10.78	384.6	5.41	4.49	1.07	3.17	712.255	9.73	14.34	9.1	1	140.944	1	0	0	0
1	33	2	0	0	1	24.91	136	60	5.66	86.9	18.82	374.6	4.8	1.92	1.02	3.04	829.071	5.37	13.65	7.5	2	100.51	1	0	0	0
1	34	0.5	0	1	0	31.25	122	69	4.39	57.4	4.07	388	3.81	3.31	0.75	2.2	498.912	5.28	14.7	6.4	1	126.989	1	0	0	0
1	34	0	0	0	1	17.43	134	72	4.23	74.9	22.8856	360.8	3.6	2.23	0.88	2.06	330.896	7.42	17.09	10.6	1	119.45	0	0	0	0
1	34	1	0	0	1	23.63	138	93	5.23	59	8.2758	377.3	4.96	4.09	0.8	2.7	624.713	8.73	16.54	7.2	1	125.562	1	0	0	0
1	34	1	1	1	0	25.1	137	80	4.32	71.8	27.6	376.1	4.2	2.68	0.67	3.06	573.868	11.88	18.97	9.1	1	125.713	1	0	0	0
1	34	3	0	0	0	27.89	119	77	5.6	68.3	23.69	359.8	5.79	2.21	1.28	3.89	259.093	4.9	14.07	6.5	1	133.542	0	0	0	0
1	35	0.1	0	0	0	21.67	110	70	5.5	76.2	28.859	386.1	6.61	1.57	1.56	4.35	562.14	8.36	16.09	9.6	1	116.171	1	0	0	0
1	35	10	1	0	0	26.53	110	75	5.2	73.7	4.2612	344.8	7.08	1.03	1.28	4.72	476.5	7.02	13.91	7.1	1	120.952	0	0	0	0
1	35	9	1	0	1	25.24	127	70	4.45	76	19.7935	335	6.05	1.27	1.19	4.15	817.679	4.57	14.49	6.3	1	116.541	0	0	0	0
1	36	0.25	1	1	1	27.1	132	86	4.58	62.2	3.3	351.1	2.84	2.86	1.04	0.97	524.61	4.17	11.27	5	1	147.448	0	0	0	0
1	36	0	0	0	0	28.04	114	66	5.5	77	10.2653	357	2.85	1.18	0.61	1.91	733.73	13.68	27.25	13	1	113.911	0	0	0	0
1	36	3	1	0	0	25.69	129	78	5.4	64.4	3.26	351.3	3.86	2.95	0.86	2.31	535.228	12.29	20.91	11.5	1	141.38	1	0	0	0
1	36	5	1	0	1	25.81	134	82	6.08	67.9	15.11	389	4.38	2.32	1.11	2.82	555.863	7.01	15.53	7.8	1	132.618	1	0	0	0
1	37	0.1	0	0	0	27.34	118	78	4.03	71.6	10.21	350.5	5.17	1.62	1.34	3.58	448.629	5.54	11.56	7.3	1	123.507	1	0	0	0
1	37	1	1	1	0	28.98	131	95	5.3	57	8.22	371.5	5.6	2.04	1.22	3.68	566.15	13.07	25.96	10.6	1	124.699	1	0	0	0
1	37	7	1	1	0	26.67	110	70	4.3	60	22.66	333.7	4.38	1.8	0.9	2.78	245.08	7.51	17	8.2	1	122.097	0	0	0	1
1	38	0.1	0	0	1	21.63	135	85	4.43	65.1	16.64	360	5.55	3.81	0.99	3.4	563.799	13.93	21.17	9.9	1	137.598	1	0	0	0
1	38	0	0	0	0	20.96	110	70	4.8	68	27.0598	351.2	4.17	3.76	0.87	1.84	433.717	3.37	3.97	7	1	130.535	0	0	0	0
1	38	2	1	0	1	30.41	130	82	5.08	72.7	13.41	334.8	5.29	2.64	1.06	3.83	433.349	11.85	20.65	10	1	120.402	1	0	0	0
1	39	0.1	0	0	1	20.81	116	71	5.17	67.6	3.37	355	3.95	1.91	0.76	2.89	604.217	8.21	18.77	9.7	1	130.549	1	0	0	0
1	39	0.1	0	0	0	23.44	116	66	6.49	70.8	14.04	349.2	6.2	2.74	0.88	4.04	526.961	11.01	18.72	11.1	1	123.45	1	0	0	0
1	39	0.5	1	0	0	32.85	155	98	5	76	29.75	356.1	5.32	3.61	0.89	3.54	686.89	6.06	14.82	9.3	1	113.312	0	0	0	0
1	39	0	0	0	0	21.36	109	76	6.7	65	11.5776	350.6	6.05	1.69	0.82	4.13	530.02	7.6	16	7.7	1	136.889	0	0	0	0
1	39	0	1	1	0	33.2	128	94	4.57	53.9	29.3561	378	7.25	17.17	0.83	2.18	372.006	7.92	16.04	9.4	1	125.818	1	0	0	0
1	39	1	1	0	0	28.12	130	70	5.4	71.3	6.82	377.5	4.77	3.17	0.8	3.39	453.19	10.04	18.86	7.8	1	122.404	1	0	0	0
1	39	10	1	0	1	24.63	120	80	7.95	69.5	15.43	374.2	5.02	1.71	0.99	3.38	711.028	7.49	17.12	11.1	1	126.247	1	0	0	0
1	39	2	0	0	1	23.31	123	65	5.82	81.5	2.66	341.9	5.42	1.38	1.16	3.68	319.14	4.61	11.67	6.4	1	104.133	0	0	0	0
1	39	2	0	0	1	29.55	129	73	6.33	74.5	16.4307	365.7	4.93	3.04	1.11	3.26	679.452	5.6	12.86	6.2	1	116.076	1	0	0	0
1	39	2	1	1	1	32.46	122	83	5.68	77.9	1.87	341.9	6.43	5.27	1.08	3.53	537.13	8.08	16.76	7.5	1	109.979	0	0	0	0
1	39	3	0	0	0	22.83	139	90	2.9	63	19.1072	328.6	4.75	2.1	0.82	3.18	297.98	4.88	9.18	7.3	1	142.16	0	0	0	0
1	40	0.25	0	0	1	27.34	127	78	5.94	73.1	6.76	368.2	4.78	12.44	0.68	1.65	395.024	9.08	18.96	10.9	1	117.938	0	0	0	0
1	40	0.5	0	0	0	23.83	112	84	5.7	47	29.7	357.3	5.88	1.05	0.94	4.55	553.33	16.15	31.52	15	1	132.173	0	0	0	0
1	40	0.5	1	1	0	24.84	110	70	6.2	88	4.72	381.7	3.29	5.68	0.64	1.08	617.33	13.16	23	10.6	1	94.2431	1	0	0	0
1	40	1	0	0	0	30.36	176	94	3.98	76.7	5.27667	362.1	4.19	1.5	0.94	2.8	282.821	7.21	21.58	10.3	1	111.279	1	0	0	0
1	40	1	0	0	0	23.62	135	91	5.39	19.4	5.48	356.1	5.21	1.83	1.2	3.42	303.459	8.57	17.63	8.9	1	190.146	0	0	0	0
1	40	2	1	0	0	26.31	140	88	4.8	69.9	18.72	381.2	3.46	4.25	0.69	1.61	497.786	13.16	22.85	7.6	1	124.496	1	0	0	0
1	40	4	0	0	0	26.04	139	75	5.01	64.9	26.0423	340.6	5.84	4.01	1.04	3.75	545.533	8.81	19.94	8	1	136.184	0	0	0	0
1	41	0.1	1	1	0	27.39	141	81	4.9	65	21.9768	344.6	3.83	1.56	0.83	2.64	316.79	7.73	18.38	10.3	1	134.979	1	0	0	0
1	41	0.25	1	0	0	20.7	130	75	5.13	68.9	7.77	347.6	4.84	1.83	0.81	3.82	440.955	12.3	25.68	14.4	1	125.797	1	0	0	0
1	41	1	0	0	0	23.83	150	100	6.45	62.8	9.26	366.3	5.18	4.36	0.78	3	625.491	12.21	20.22	8.7	1	140.717	1	0	0	0
1	41	10	0	0	1	27.69	140	70	7.13	79.6	24.918	353	4.66	1.69	1.12	3.04	783.14	16.28	31.03	10.8	1	105.651	0	0	0	0
1	41	2	0	0	1	21.33	139	85	7.17	61.6	13.5149	328.9	6.47	2.4	1.06	4.47	317.204	10.64	22.66	9.1	1	117.437	1	0	0	0
1	41	2	0	0	1	23.44	101	80	5.46	71.9	3.64	366.8	3.88	1.95	0.8	2.65	481.318	7.72	18.53	8.7	1	119.479	1	0	0	0
1	41	7	0	0	0	24.84	126	85	5.33	70.5	21.4	346.2	4.39	1.09	1.34	2.88	604.68	6.3	13.49	6.3	1	122.354	0	0	0	0
1	41	7	1	0	0	25.34	122	66	4.6	61	29.4313	337.5	7.02	1.9	0.98	4.67	485.55	8.67	20.22	8	1	117.911	1	0	0	0
1	42	0.25	0	0	0	28	133	80	4.29	74.8	6.95	331	5.17	1.7	1.13	3.35	377.104	5.13	6.94	5.4	1	113.105	1	0	0	0
1	42	0.5	0	0	0	24.84	126	80	4.6	57.8	22.66	375.3	5.78	2.88	0.68	3.72	625.82	13.25	25.81	11	1	119.707	1	0	0	0
1	42	0	0	1	0	27.77	122	80	5.4	76	24.4754	349.4	6.45	1.5	1.18	4.74	832.02	10.46	25.64	13.2	1	110.949	0	0	0	0
1	42	1	0	0	0	30.89	131	83	4.67	68.8	9.53	333	5.32	1.54	1.02	4.19	766.26	4.98	6.57	5	1	125.136	0	0	0	0
1	42	1	0	0	0	27.3	130	84	5.42	73.7	17	349.4	5.32	1.64	1.1	4.09	598.459	10.64	18.93	11	1	115.149	0	0	0	0
1	42	3	1	1	0	23.68	112	76	6.9	71.1	5.91	326.8	5.32	4.15	0.68	3.6	571.251	14.08	23.64	11.7	1	120.259	1	0	0	0
1	42	5	0	0	0	25.56	156	88	5.84	73.7	24.9	371.1	4.97	2.74	0.87	3.22	918.414	4.54	15.27	6.3	1	115.149	1	1	0	0
1	42	5	1	1	0	27.27	120	80	7.45	60.3	7.57	358.5	3.6	1.56	0.8	2.5	570.974	6.23	10.16	6.1	1	117.642	1	0	0	0
1	42	5	0	0	0	25.15	110	70	7.44	82.9	25.33	369.7	4.17	2.92	0.77	2.29	854.127	7.2	14.32	6	2	99.8838	0	0	0	0
1	43	0.5	0	0	0	23.83	127	92	4.22	67.4	10.81	348	5.11	1.77	0.96	4.09	441.058	5.85	17.02	7.3	1	127.388	0	0	0	0
1	43	0	1	0	1	25.2	127	83	5.41	66.7	13.33	345.7	5.75	2.71	0.85	4.6	534.862	7.43	16.8	10.2	1	129.006	0	0	0	0
1	43	1	1	1	0	25.03	162	95	3.5	58	29.83	372.1	4.45	3.12	0.82	2.42	541.76	8.6	15.7	9.7	1	118.701	1	0	0	0
1	43	10	0	1	0	22.55	135	77	7.58	70	15.51	353.9	2.58	1.16	0.93	1.45	413.128	10	18.2	9.1	1	121.69	1	0	0	0
1	43	10	1	0	0	27.06	156	82	7.2	73.4	22.66	375.6	8.58	5.15	1.01	5.34	600.24	11.22	20.85	8.8	1	114.908	0	0	0	0
1	43	12	1	1	0	24.35	119	81	6.18	79.6	8.89	363.6	4.31	4.43	0.83	2.43	676.011	12.13	21.36	10.5	1	104.177	1	0	0	0
1	43	2	0	0	0	29.33	120	80	5.8	70.4	22.66	359.5	2.59	1.17	0.74	1.51	339.34	9.58	14.62	7.6	1	120.854	0	0	0	0
1	43	2	1	1	0	28	138	87	5.25	83.8	13.57	387.2	6.38	2.87	0.9	4.36	677.53	6.5	15.65	6.6	1	97.8982	1	0	0	0
1	43	2	0	0	1	25.97	119	68	4.09	88.4	12.06	359.2	3.54	0.87	3.54	2.39	530.878	4.67	13.04	5.3	1	91.7732	1	0	0	1
1	43	3	0	1	1	30.04	158	99	6.03	72.9	8.02	333.8	5.84	15.64	0.83	1.21	890.322	9.01	18.65	10	1	115.862	1	0	0	1
1	43	5	1	1	1	22.21	134	83	6.23	58.3	23.84	374.3	4.77	4.55	1.08	2.51	576.543	13.14	19.21	7.7	1	118.449	1	0	0	0
1	43	6	1	0	1	33.91	127	74	4.82	55.8	7.72	383.4	5.69	2.57	0.92	4.2	691.731	11.19	22.19	9.4	1	120.602	0	0	0	0
1	44	0.5	0	0	0	18.97	141	99	4.62	68	15.34	388.5	4.9	2.23	1.16	3.08	564.123	5.16	9.91	7.2	1	125.148	0	0	0	0
1	44	0	0	0	0	25.33	141	91	5.62	104.5	55.26	365.5	5.75	3.78	0.83	3.61	574.807	8.73	14.22	8.9	2	74.4414	1	0	1	0
1	44	1	0	0	0	29.94	120	70	5.39	74.9	27.5551	332.2	3.66	0.84	1.05	1.76	579.991	4.83	14.72	6.8	1	111.347	0	0	0	0
1	44	10	1	1	0	26.67	122	79	5.5	70	14.8631	390.5	5.76	2.9	0.86	3.46	373.15	12	19.35	10.3	1	120.838	1	0	0	0
1	44	10	1	0	0	25.11	130	80	4.2	58	0.398476	341.4	4.02	3.11	0.67	2.04	409.84	12.29	18.1	10.1	1	117.87	1	0	0	1
1	44	12	1	0	1	24.61	120	62	4.35	69.2	10.37	330	5.07	1.78	0.75	3.67	625.631	5.23	13.4	7.4	1	122.529	1	0	0	0
1	44	2	1	0	0	28.31	129	80	6.17	84.2	6.82	344.6	4.99	2.59	0.8	3.42	744.693	8.07	14.48	7	1	96.6549	0	0	0	0
1	44	3	1	0	0	24.84	105	76	5.2	72	22.66	333.5	4.44	1.72	0.73	2.95	282.35	111.88	16.25	8.5	1	116.791	1	0	0	1
1	44	3	1	1	1	27.89	100	60	6.33	71.7	13.0306	362.9	6.23	3.31	0.89	4.02	373.487	8.95	18.53	8.3	1	117.383	0	1	0	0
1	44	3	0	1	0	17.71	130	80	4.05	58.8	10.11	335	4.9	1.75	1.05	3.62	661.323	8.3	15.6	7.5	1	117.208	1	0	0	0
1	44	5	1	0	0	29.9	110	70	6.2	81	4.64	381.4	3.2	1.31	0.59	2.19	554.471	6.45	19.8	7.4	2	101.29	0	0	0	0
1	44	8	1	1	1	22.89	110	88	5.15	52.9	4.11	331.3	4.44	3.39	0.68	2.69	404.17	5.92	15.33	6.6	1	122.414	0	0	0	0
1	45	0.1	0	1	0	23.73	111	68	4.48	53.7	3.02	365.6	2.76	0.78	0.95	1.72	503.006	6.3	19.94	12.3	1	120.81	0	0	0	0
1	45	0.2	0	1	0	29.56	113	77	5.7	73.8	13.1646	332	5.04	3.31	1.01	3.24	633.84	12.05	21.42	10.9	1	112.563	0	0	0	0
1	45	1	0	0	0	29.78	120	70	5.6	68.3	26.91	338.4	5.34	6.77	1.1	2.55	565.29	6.42	12.17	9.4	1	123.612	1	0	0	0
1	45	10	0	0	0	22.58	163	83	3.38	70.6	22.66	364	4.71	0.98	1.4	2.21	666.992	4.4	15.71	5.9	1	118.76	0	0	0	0
1	45	10	1	1	1	30.02	138	81	3.99	53.9	6.61	389.7	4.94	1.6	1.25	2.83	348.824	12.88	19.84	8.8	1	120.625	1	0	0	0
1	45	15	1	0	0	22.22	126	80	6.2	63	22.66	341.1	4.56	3.33	0.66	2.76	441.26	13.42	22.2	9.9	1	136.293	0	0	0	0
1	45	17	1	0	0	33.2	127	81	8.52	91.5	19.5	366.2	4.9	0.68	1.89	2.91	648.437	7.36	17.42	8.3	2	86.7995	0	1	0	0
1	45	4	0	1	0	26.67	132	88	4.4	64	18.821	375.6	5.87	10.54	0.77	2.03	502.46	18.08	22.52	11.6	1	133.722	1	0	0	0
1	45	5	1	1	0	28.3	125	81	5.4	72.6	6.86558	364	4.56	3.22	1.12	2.38	409.67	6.13	10.3	6.2	1	114.816	0	0	0	0
1	45	5	1	1	0	22.89	120	70	3.8	69	22.66	359.4	4.25	3.38	0.73	2.52	362.16	8.99	15.46	6.7	1	122.097	1	0	0	0
1	45	6	0	1	0	18.49	136	76	5.61	60.3	29.1994	357.6	4.81	3.54	0.97	3	651.778	8.52	20.39	7.9	1	115.189	0	0	0	0
1	45	9	1	1	1	23.53	114	70	3.87	71.1	22.66	341.7	2.48	1.87	0.96	0.68	845.392	5.51	17.13	7.4	1	117.751	0	0	0	0
1	46	0.1	0	0	0	28.04	117	74	4.82	70.2	6.43	368.8	4.51	4.8	0.75	2.63	423.255	8.98	23.02	9.1	1	118.742	1	0	0	0
1	46	0.5	1	0	0	27.26	130	80	8.18	81.9	21.75	369.3	4.32	1.33	0.65	3	729.102	4.57	18.48	8.1	1	98.5517	1	0	0	0
1	46	0.5	1	1	0	20.96	149	99	6	59	26.8261	363.6	5.02	1.22	1.11	3.37	545.59	7.5	21.55	10.4	1	115.412	0	0	0	0
1	46	0	0	0	0	25.3	139	90	4.3	62.5	13.6171	336.3	3.85	5.03	0.7	1.53	726.49	12.36	23.74	9.6	1	136.649	0	0	0	0
1	46	1	0	1	0	28.76	120	76	3.7	54.9	22.66	344.2	5.91	1.22	1.57	3.99	1027.6	13.71	27.48	12	1	118.879	0	0	0	0
1	46	10	1	0	1	23.34	130	80	5.06	53.4	6.65	386.9	5.5	5.15	0.72	2.72	757.388	14.62	25.48	11.1	1	120.24	1	0	0	0
1	46	10	1	1	0	29.05	131	80	4.9	51	20.4406	338.3	4.73	2.83	0.94	3.02	331.24	11.12	20.67	9	1	122.535	1	0	0	0
1	46	10	0	0	0	19.38	144	84	4.8	63	4.11641	347.8	7.58	1.72	1.22	5.14	586.05	15.44	29.54	10.3	1	135.339	1	0	0	0
1	46	11	0	1	0	24.44	105	63	3.5	62	22.66	366	4.14	1.27	1.09	2.41	536.91	6.48	15.22	5.8	1	137.982	0	0	0	0
1	46	11	0	0	0	31.2	140	110	2.87	67.6	6.94	337.9	6.42	15.36	0.9	1.56	719.44	9.28	17.46	9.7	1	124.285	0	0	0	0
1	46	14	0	0	1	31.64	150	98	5.89	74.5	22.66	341.9	3.71	2.94	0.81	2.33	784.474	8.99	21.21	7.7	1	110.506	1	0	0	0
1	46	2	1	1	0	23.73	120	74	6.19	59.7	22.66	360.1	3.42	1.27	0.88	2.32	364.77	3.03	9.36	5.9	1	114.854	0	0	0	0
1	46	3	1	1	0	24.97	122	64	4.2	63.8	6.1	328.1	4.02	1.34	0.77	2.87	648.91	8.32	11	7.3	1	133.29	0	0	0	0
1	46	3	1	0	0	20.03	130	80	4.27	66	3.5	374.9	2.36	3.59	0.84	1.23	426.014	5.05	14.27	5.7	1	127.937	1	0	0	0
1	46	7	1	1	0	20.08	120	70	5.7	83	22.66	331.1	3.46	1.11	0.79	2.42	549.38	5.44	15.98	7.4	1	96.9748	0	0	0	0
1	47	0.25	1	1	0	20.92	120	70	4.17	91.7	6.61	377.8	2.73	1.22	0.98	1.61	579.195	3.97	9.53	9.5	2	85.3629	0	0	0	0
1	47	0.5	1	1	0	24.88	121	75	5.2	63.8	14.4511	372.1	6.47	5.96	1	3.25	428.15	9.12	18.21	9.8	1	132.357	0	0	0	0
1	47	0	1	0	0	22.6	116	80	5.84	66.8	16.76	357.4	4.15	3.2	0.92	2.46	529.196	10.38	19.65	10.4	1	125.204	1	0	0	0
1	47	1	0	1	0	30.41	128	78	6.93	61.4	2.38	382.3	3.6	1.47	0.9	2.47	518.629	3.26	9.02	5.9	1	112.741	1	0	0	0
1	47	1	1	1	1	30.44	129	80	6.55	69.7	4.62	380.8	4.81	2.19	0.9	3.59	717.779	13.09	21.32	9.1	1	118.934	1	0	0	0
1	47	10	1	1	0	23.11	120	80	2.45	72.8	23.84	351.7	7.59	2	1.06	5.98	407.555	5.61	13.28	7.2	1	112.838	1	0	0	0
1	47	5	0	0	0	29.07	170	95	6	76	7.70625	368.6	3.48	1.01	0.95	2.06	718.86	8.51	17.58	7.7	1	107.12	0	0	0	0
1	47	5	0	0	0	19.13	132	74	4.52	73	7.86	331.5	4.3	1	1.02	2.73	670.264	9.53	23.86	9.3	1	112.465	0	1	0	0
1	47	5	0	0	0	18.4	130	92	3.96	72.1	16.92	370.8	5.95	4.43	0.92	2.96	687.449	6.37	14.23	7.3	1	114.164	1	0	0	0
1	47	6	0	1	0	31.25	166	90	5.1	54.7	4.69	388.8	8.17	11.69	1.11	2.73	831.789	9.57	21.31	8.5	1	118.224	1	0	0	0
1	47	9	1	0	1	23.44	146	97	6.53	92.6	21.393	386.9	5.48	2.18	0.93	3.85	692.198	14.48	21.78	9.2	2	84.3609	1	0	0	0
1	48	0.1	1	1	0	22.95	125	78	3.61	74.1	22.9623	351.3	3.71	2.56	0.75	2.32	685.114	14.56	31.08	12	1	109.676	1	0	0	0
1	48	0.4	1	1	0	20.96	111	76	4.06	81.8	3.12	369.6	5.41	1.69	0.92	4.45	654.395	9.58	20.49	8.5	2	97.3205	1	0	0	0
1	48	13	0	1	0	24.22	121	74	5.2	69.6	21.2671	360.6	6.34	7.1	0.92	2.76	543.329	11.59	26.24	9.8	1	118.306	0	0	0	0
1	48	2	0	1	0	19.03	134	82	5.88	74	25.1484	370.7	3.94	5.36	0.67	2.14	642.694	12.6	24.41	10.2	1	109.856	0	0	0	0
1	48	3	1	1	0	29.38	130	70	6.6	83	25.0813	365.3	4.29	2.37	0.8	2.24	676.81	6.69	8.58	12.5	1	95.622	1	0	0	0
1	48	4	1	1	1	22.95	127	79	4.86	54.9	5.03	328	5.67	2.02	1.04	4.29	666.558	10.52	21.62	9.3	1	117.221	0	0	0	0
1	48	5	0	0	0	20.82	134	79	5.28	67.1	22.66	356.4	4.38	3.8	0.94	2.53	830.661	7.66	17.06	7.9	1	123.656	0	0	0	0
1	48	9	1	0	0	19.53	117	70	5.87	61.2	3.28	390.1	5.78	9.99	0.76	1.83	534.23	13.37	25.27	10.6	1	112.102	1	0	0	0
1	49	0.25	0	0	0	23.24	123	84	6.1	82.2	12.66	337.1	3.59	0.78	0.89	2.81	313.22	7.92	17.31	7	1	96.071	1	0	0	0
1	49	0.5	1	1	0	25.24	148	85	2.77	47.4	28.7115	386.7	8.2	20.02	0.64	2	605.518	9.25	24.16	8.9	1	123.644	1	0	0	0
1	49	0	0	0	0	24.03	146	99	6.99	78.9	9.44	379.5	5.68	4.07	0.87	3.67	465.574	12.84	22.18	11.4	1	100.95	1	0	0	0
1	49	0	1	1	0	27.34	129	80	7.05	74	4.51	366.4	5.55	5.64	0.86	2.54	372.351	11.2	20.42	10	1	109.087	1	0	0	0
1	49	0	0	0	0	27.14	123	81	5.84	69.3	6.49	384.3	4.2	1.06	1.04	2.84	761.006	6.9	14.48	7.7	1	118.093	0	0	0	0
1	49	1	1	0	0	26.71	123	73	4.78	79.3	22.6578	329.6	5.19	2.63	0.84	3.43	509.976	4.57	16.01	8	1	100.335	1	0	0	0
1	49	12	0	0	1	28.26	132	78	5.74	97	8.2	357.3	5	1.14	0.87	3.83	320.7	5.54	15.14	9	2	78.6439	0	0	0	0
1	49	14	1	1	0	22.86	137	62	4.17	75.8	16.763	354.7	4.27	1.89	0.92	2.54	661.899	4.4	12.92	7.6	2	105.963	1	0	0	0
1	49	2	1	1	1	24.22	128	75	6.93	59.6	13.0369	357.5	4.85	2.53	1.01	2.87	561.241	10.81	21.8	8.8	1	112.536	0	0	0	0
1	49	2	0	1	0	22.67	131	76	5.9	70	22.66	351	5.09	1.94	1.44	2.57	840.81	7.61	15.33	6.9	1	116.667	0	0	0	0
1	49	4	0	1	0	28.4	134	90	6.1	75	22.66	340.8	5.26	1.48	1.43	3.41	673.54	4.97	8.81	6.5	1	107.331	0	0	0	0
1	49	5	0	0	0	23.44	120	70	5.3	71.3	20.106	366.5	4.76	3.94	0.9	2.86	370.458	6.25	13.26	7.9	1	114.1	0	0	0	0
1	49	5	1	1	0	21.34	136	90	5.7	72	22.66	377.4	3.52	1.51	0.92	2.11	548.36	6.68	11.98	6.3	1	112.761	0	0	0	0
1	49	6	0	0	1	27.92	144	100	5.54	69.2	15.43	343.9	2.33	2.17	0.81	1.09	738.664	5.94	16.14	10.1	1	118.3	1	0	0	1
1	49	6	0	0	0	32.05	120	70	3.9	60	7.80554	334.2	5.19	1.53	1.19	3.45	253.38	12.48	20.98	12.5	1	112.227	0	1	0	1
1	49	6	0	1	0	27.34	120	70	5.51	47.3	21.75	335.5	6.72	17.69	0.75	1.13	490.182	11.05	19.93	9.1	1	123.751	0	0	0	0
1	49	6	0	1	0	23.59	126	84	6.1	83	5.87	360.3	7.08	4.59	1.24	3.98	615.15	14.27	22.06	10.7	1	94.9526	0	0	0	0
1	49	7	0	1	1	29.41	120	80	3.93	60.5	13.86	360.7	9.08	2.72	1.14	6.9	658.156	15.91	27.94	15.5	1	111.845	0	0	0	0
1	49	8	1	1	0	28.52	134	80	5.86	73.2	5.2	357.3	3.48	1.33	0.92	2.31	678.836	5.6	14.72	6.5	1	110.53	1	0	0	0
1	49	8	0	0	0	20.94	135	89	5.17	96.3	22.66	390.5	5.49	1.21	1.52	2.59	709.785	10.02	20.39	8.2	2	79.3356	1	0	0	0
1	49	8	0	1	0	21.72	135	89	4.63	88.1	2.91	367.1	5.14	0.69	1.92	2.68	324.413	8.93	19.16	7.8	1	88.3479	0	0	0	1
1	50	0.5	1	1	0	22.58	118	67	9.74	90.3	5.53	342.6	4.25	1.16	0.89	2.91	616.393	3.78	8.1	6.3	2	85.152	0	0	0	0
1	50	0	0	0	0	27.64	117	96	4.89	75.4	8.75	380.1	4.97	5.56	0.79	2.87	354.244	8.59	18.81	9.5	1	105.896	0	0	0	0
1	50	10	0	0	1	20.94	156	91	5.31	53.9	6.30202	355.2	6.25	7.32	1.02	3.05	666.733	17.97	26.27	12.2	1	116.462	1	0	0	0
1	50	12	0	0	0	21.51	135	84	4.38	71.4	7.48	378	4.35	5.26	1.02	2.03	631.786	9.28	16.63	7.9	1	113.11	1	0	0	0
1	50	13	0	0	0	25.71	140	80	5.56	78	3.12	348.6	5.72	1.39	1.15	4.18	523.562	8.68	18.19	10	1	101.643	0	0	0	0
1	50	2	1	1	0	22.03	110	70	4.07	88.4	16.4307	356.7	4.43	2.45	0.98	2.78	691.569	6.28	10.35	6.3	2	87.3697	1	0	0	0
1	50	2	1	0	1	21.88	130	72	3.96	59.6	4.87	350.4	4.91	1.35	0.87	4.08	439.664	5.89	17.65	7.3	1	111.748	0	0	0	0
1	50	3	1	1	0	25	140	95	3.78	84	22.66	338.3	5.63	4.35	0.99	3.11	583.21	7.69	12.02	6.9	2	92.9326	1	0	0	0
1	50	5	0	0	0	24.22	148	79	5.26	62.5	16.78	364.9	4.23	1.52	0.87	2.99	343.476	8.13	21.16	8.5	1	132.863	0	0	0	0
1	50	5	1	1	1	31.24	156	100	5.35	73	3.8	336.4	3.53	1.17	1.01	2.33	433.232	3.68	9.64	5.4	1	110.119	0	0	0	0
1	50	5	0	0	1	24.17	151	88	6.34	153.1	83.3	367.8	3.43	1.06	0.9	2.27	589.65	6.94	21.02	11.9	3	44.9766	0	1	1	0
1	50	5	0	1	0	24.78	140	69	4.87	77.7	23.98	359.6	5.42	1.48	1.09	3.78	814.872	6.56	16.3	6.8	1	102.118	0	0	0	0
1	50	5	0	0	0	26.89	120	75	4.93	71.7	3.57	353.1	4.47	2.72	0.97	2.59	280.59	6.99	16.85	7	1	112.538	0	0	0	0
1	50	7	1	1	0	21.78	160	77	3.65	57.2	8.30956	361.6	5.69	9.27	0.87	1.46	482.552	10.51	19.33	8.2	1	113.652	1	0	0	0
1	51	0.25	1	1	1	22.14	157	91	5.4	52.6	4.16	386.9	4.55	2.69	1.03	2.43	538.3	10.73	20.06	8.4	1	116.813	0	0	0	0
1	51	0.25	0	1	0	24.22	125	77	6.6	66	2.64528	357.4	5.75	3.41	0.89	3.1	748.1	8.75	16.15	8.5	1	123.521	1	0	0	0
1	51	0	1	1	1	24.98	110	70	6.6	104.4	3.19	329.2	5.73	1.88	1.16	4.05	508.866	8.56	18.82	8	2	70.9515	0	0	0	0
1	51	1	0	0	0	23.38	124	81	4.43	77.3	5.52	351.2	3.57	1.74	1.01	2.28	411.602	4.58	16.4	6.9	1	102.038	1	0	0	0
1	51	1	0	0	0	24.97	130	84	5.99	76.1	22.66	388.6	5.39	2.95	0.71	3.58	757.446	6.23	16.13	10.1	1	103.986	1	0	0	0
1	51	1	0	0	0	21.91	150	90	4.44	94.3	26.1507	362.1	3.52	2.97	0.9	2.1	489.672	8.75	15.18	7.6	2	80.2391	1	0	0	0
1	51	10	0	1	1	27.51	135	90	4.2	55	20.096	343.8	4.14	0.93	1.03	2.43	528.28	8.58	25.03	12	1	114.69	1	0	0	0
1	51	2	1	1	0	22.68	143	94	4.6	64	13.47	345.9	7.25	9.19	0.9	2.27	526.36	12.24	20.58	11.1	1	128.203	0	0	0	0
1	51	4	0	1	0	22.48	140	96	6.5	79.2	19.4485	359.7	3.59	1.17	1.08	1.88	386.61	5.34	12.22	5.8	1	99.0859	0	0	0	0
1	51	5	0	0	0	26.49	123	83	6.26	78.6	12.45	332.4	4.56	1.99	0.91	2.9	648.704	7.94	15.42	8.5	1	100.001	1	0	0	0
1	51	6	1	0	1	26.84	135	85	3.49	68.5	6.77	371.5	6.1	5.63	1.04	3.16	495.714	6.84	13.75	6.9	1	118.092	0	0	0	0
1	51	7	1	1	0	24.14	149	97	4.8	75	22.66	337.3	2.25	1.56	0.93	0.8	354.37	5.99	15.19	6.4	1	105.833	1	1	0	0
1	51	8	1	1	1	23.07	138	74	4.94	50.9	4.95	336.5	3.95	2.77	0.94	2.41	686.347	11.33	23.21	9.3	1	118.401	1	0	0	1
1	52	0.25	0	0	0	23.73	117	80	5.7	61	24.4203	327.1	4.83	1.81	0.81	3.48	607.4	9.85	19.09	8.6	1	109.143	1	0	0	1
1	52	1	1	0	0	28.34	120	72	12.59	201.1	37.5	359.3	6.84	3.73	0.85	3.8	626.823	7.48	21.7	8.6	3	31.893	0	0	1	0
1	52	1	0	0	0	23.03	135	82	4.4	66.2	2.00727	360.9	6.04	1.12	1.05	4.15	173.24	7.4	16.78	7.1	1	122.209	0	0	0	1
1	52	10	1	1	0	31.25	147	93	6.16	86.8	5.81	354.2	3.29	5.94	1.53	1.08	530.761	2.51	9.4	6.3	2	88.0744	0	0	0	0
1	52	10	0	0	0	22.38	133	92	6.8	85.4	22.66	349.7	6.4	16.15	0.8	1.85	326.65	13.55	16.06	8.4	1	89.823	1	0	0	0
1	52	13	0	1	0	23.44	170	70	8	60	3.99	332.1	5.61	1.05	1.32	3.68	407.76	8.56	22.22	8.3	1	109.887	0	1	0	0
1	52	2	0	0	0	21.3	125	77	7.95	66.2	10.4	348.1	6.13	3.91	0.93	3.38	693.365	10	18.28	10.1	1	122.209	1	0	0	0
1	52	20	0	0	0	25.2	159	85	6.2	60	16.47	327.6	4.37	0.97	1.26	2.72	369.37	6.27	18.45	6.9	1	109.887	1	0	0	1
1	52	5	0	0	0	20.76	129	77	6.4	56.8	18.68	370.3	6.42	2.07	1.12	4.4	810.261	13.6	23.28	11.9	1	112.39	0	1	0	0
1	52	5	0	0	0	24.84	120	70	5.71	102	3.47	330.4	6.67	3.41	1.19	4.6	645.278	9.93	18.76	11	2	72.464	1	0	0	0
1	52	7	1	0	0	25.39	120	75	3.8	79.7	3.4	350.9	4.72	1.49	1.01	3.77	573.438	7.51	19.21	9.4	1	97.6466	0	0	0	0
1	53	0.1	1	0	0	21.05	120	85	6.13	82.1	19.857	338.8	4.15	1.01	0.69	3.08	626.963	5.27	14.74	6.9	1	93.5467	0	0	0	0
1	53	0.2	0	0	0	24.77	116	72	6.2	79	0.450429	350.2	5.09	1.47	1.51	2.74	560.27	14.81	27.3	13.7	1	156.29	1	0	0	0
1	53	0.25	0	1	1	25	92	57	4.89	68.2	7.93	350.1	3.15	1.2	0.94	2.01	622.751	9	20.58	9.7	1	117.064	0	0	0	1
1	53	0	1	0	0	23.63	172	102	3.93	58.2	21.75	345	3.74	2.06	1.99	1.56	636.157	8.08	17.43	8.8	1	110.492	1	0	0	1
1	53	10	1	0	0	24.46	120	70	6.73	73.1	2.91	357.4	4.58	0.79	1.12	2.98	767.695	5.17	9.16	6.9	1	107.645	0	0	0	0
1	53	10	1	0	0	24.05	150	80	5.81	84.7	10.5803	326.7	4.61	2.86	0.78	2.74	593.837	6.81	17.2	9.4	1	90.0862	0	0	0	1
1	53	10	1	1	0	25.39	174	91	3.1	61.8	23.0252	349.2	5.89	1.37	1.28	3.44	450.74	15.03	26.52	12.5	1	107.8	1	0	0	1
1	53	11	0	1	0	18.9	108	68	5.9	85	22.66	359	5.79	1.66	1.12	3.61	363.22	8	16.97	7	1	89.7019	1	1	0	0
1	53	12	1	0	0	20.43	128	83	6.7	93.4	22.1765	361.4	5.35	3.76	0.79	2.7	308.27	10.08	16.39	8.8	1	80.0424	0	0	0	0
1	53	15	0	1	0	22.04	114	80	6.1	96	4.98	370	4.4	1	1.2	2.91	562.46	7.52	19.49	9.5	1	77.4289	0	0	0	0
1	53	2	1	1	0	24.68	140	92	7.45	70.7	18.12	339.6	6.29	2.95	0.87	4.03	472.963	10.23	19.36	10.1	1	112.078	1	0	0	0
1	53	3	1	1	0	18.82	120	87	6.09	83.9	11.87	354.4	4.5	10.3	0.85	1.24	580.36	7.38	17.02	11.4	2	91.1257	1	0	0	0
1	53	3	1	0	1	21.88	120	90	4.34	77.1	8.54	385.9	4.84	3.83	1.05	2.89	478.207	6.33	12.02	6.8	1	100.93	1	0	0	0
1	53	6	1	1	1	22.03	130	80	5.69	79.5	4.64	345.7	3.53	0.62	1.25	1.93	372.683	5.94	12.32	6.5	1	97.258	0	0	0	0
1	53	7	0	0	0	24.61	110	80	7.08	57.5	6.53	329.5	5.17	1.31	1.14	2.67	743.564	6.82	13.13	6.9	1	111.043	1	0	0	0
1	53	8	0	0	0	30.04	145	101	4.9	84	2.77	377.3	3.76	1.38	1.12	2.04	505.96	12.04	20.72	9.4	1	90.9946	1	1	0	1
1	54	0.1	1	0	0	23.42	122	75	4.1	45.5	14.9988	368.4	2.44	1.09	0.84	1.32	354.51	5.22	10.09	5.8	1	121.401	0	0	0	0
1	54	0.25	1	1	0	19.57	130	83	4.5	50	22.66	373.3	5.6	2.66	0.86	3.69	471.47	10.4	21.03	9.1	1	116.785	1	0	0	0
1	54	1	0	0	0	24.92	149	86	7.6	62	6.25	362.6	4.35	2.47	0.94	2.82	563.57	6.5	19.35	6.8	1	130.442	1	0	0	0
1	54	10	1	1	1	20.55	130	72	4.56	72.6	7.7	376.9	6.29	1.02	1.55	4.09	542.26	7.22	20.31	7.1	1	107.782	1	0	0	0
1	54	12	0	0	0	21.3	103	80	8.7	48	19.857	346.5	4.9	0.49	1.13	3.69	314.85	8.8	15.05	12.4	1	118.761	0	0	0	0
1	54	15	0	0	0	24.25	120	78	7.5	73	22.66	357.7	4.09	4.52	0.75	2.44	426.37	11.88	22.19	10	1	107.068	1	0	0	0
1	54	2	0	0	0	27.55	130	76	4.3	76	29.296	351.6	3.83	1.46	0.69	2.47	442.58	7.51	17.7	8.8	1	101.98	1	0	0	0
1	54	4	0	1	0	30.82	138	82	4.9	55.4	22.66	367	4.15	2.3	1.06	2.24	512.27	6.07	7.09	6	1	111.965	0	0	0	0
1	54	7	0	1	0	20.57	120	70	4.6	67	11.5144	348.2	3.2	1.05	0.95	2.08	192.68	12.65	20.27	9.8	1	118.767	0	0	0	0
1	55	0	0	0	0	24.01	108	72	4.5	56	22.66	368.3	2.24	0.72	0.44	1.59	487.43	14.06	21	13.1	1	110.69	0	0	0	0
1	55	1	1	1	0	23.42	110	70	5.3	75.4	22.66	352.2	3.5	2.13	0.83	1.84	729.52	6.86	13.73	8.3	1	102.241	0	0	0	0
1	55	1	1	1	0	23.34	173	102	5.2	163	16.4981	379	5.38	1.91	1.19	3.08	559.12	6.24	12.72	6.8	1	105.616	1	1	0	0
1	55	10	1	0	0	24.69	123	73	8.9	61	19.95	360.9	3.41	2.91	0.71	1.68	575	10.46	17.55	9.3	1	106.867	0	0	0	0
1	55	10	1	0	0	19.53	142	80	6.5	67	22.66	360.5	3.81	1.38	0.8	2.45	488.51	14.67	22.85	10.4	1	117.935	0	0	0	0
1	55	10	1	1	0	29.3	141	81	4.5	58	27.5828	368.8	4.31	1.33	0.93	2.93	382.48	8.81	17.91	7.5	1	109.105	0	0	0	1
1	55	11	1	1	0	25.95	138	85	4.9	80	25.9656	352.3	4.34	2.77	0.84	2.28	564.47	8.62	16.97	8.2	1	95.177	1	0	0	0
1	55	12	1	1	0	22.6	128	90	4.98	67.9	8.9	326.1	5.15	4.09	1.2	3.16	603.8	9.74	19.42	7.9	1	116.048	1	0	0	0
1	55	13	0	0	0	24.34	120	70	5	70	22.66	343.9	3.27	0.75	1.15	1.69	434.47	13.41	24.83	11.8	1	111.852	0	1	0	0
1	55	16	1	1	0	24.79	148	95	5.9	80	22.66	372.6	4.31	0.86	0.77	2.97	760.61	9.4	16.17	7	1	95.177	0	1	0	0
1	55	19	0	1	0	31.22	147	82	4.1	82.5	13.7959	372.4	2.92	2.46	0.68	1.25	264.45	5.03	11.88	7	1	91.7012	0	0	0	0
1	55	2	1	0	1	23.8	108	61	5.3	62.7	20.7103	336.1	2.41	1.15	0.79	1.44	166.44	9.05	21.4	8.4	1	127.782	1	0	0	0
1	55	20	0	1	0	22.94	163	85	6.4	62	29.13	339.4	3.69	1.62	0.82	2.2	312.38	13.52	21.32	9	1	129.529	0	0	0	0
1	55	5	1	0	0	24.54	131	87	6.6	85.6	16.0699	381.6	3.65	1.83	0.68	2.18	587.61	15.38	34.45	13.3	1	87.7015	0	0	0	0
1	55	5	0	0	0	22.14	135	80	5.15	60.6	28.7725	342.5	5.69	2.02	0.93	4.19	343.342	12.68	26.85	8.5	1	107.156	0	0	0	0
1	55	5	1	0	0	19.38	116	80	5.8	63.7	17.3454	388.9	2.7	1.3	0.65	1.73	296.9	6.57	12.65	6.7	1	125.361	1	0	0	0
1	55	5	0	0	0	29.76	123	69	6.89	83	13.47	354.4	4.38	0.9	1.26	2.45	598.81	6.84	19.5	6.6	1	91.0337	0	0	0	0
1	55	5	1	1	0	24.24	107	71	6.8	77.1	10.5803	333.2	5.31	1.6	1.02	3.63	211.08	5.92	10.2	7.5	1	99.522	1	0	0	0
1	55	6	1	0	0	25.12	130	81	6.3	67	22.66	326.7	3.17	1.15	0.81	1.96	226.72	12.11	20.39	9.9	1	117.935	1	0	0	0
1	55	7	1	1	0	22.14	119	78	6.6	60.4	9.17019	373.4	5.75	1.77	1.07	3.98	571.18	10.46	19.7	6.8	1	107.302	0	0	0	1
1	55	8	1	0	0	23.44	120	89	6.5	96	22.66	382	4.52	1.4	0.94	2.94	785.02	10.49	19.52	7.8	1	76.3487	1	0	0	0
1	56	0.1	1	0	0	24.03	99	69	3.61	63.3	11.55	347.3	5.42	2.27	0.85	3.66	357.621	6.92	17.7	11.4	1	125.435	1	0	0	0
1	56	0.1	1	1	0	26.22	154	104	4.5	64	13.37	333.1	4.85	2.53	0.9	3.14	499.67	11.45	22.15	11.1	1	123.779	0	0	0	1
1	56	0.25	0	0	0	25	94	57	3.9	88	22.66	366	3	0.56	1.51	1	304.03	4.36	8.09	4.7	1	84.2243	0	0	0	1
1	56	0.25	0	0	0	24.77	127	82	4	65	19.9488	333.2	4.67	1.49	0.89	3.08	390.9	6.2	12.2	6.9	1	121.48	1	0	0	0
1	56	0	1	1	0	23.92	120	80	4.55	72	3.1111	369.4	4.35	1.96	0.91	2.68	961.055	12.51	19.25	9.5	1	107.35	0	0	0	0
1	56	0	0	0	0	23.44	126	64	4.99	73	4.95	333.9	4.36	1.01	1.13	3.13	627.214	6.16	15.43	6.9	1	105.575	1	0	0	0
1	56	1	0	1	0	24.97	130	80	5.19	64.1	25.83	362.4	4.53	4.32	0.86	2.48	543.175	5.68	12.89	6.5	1	123.545	1	0	0	0
1	56	10	1	1	0	25.2	155	73	7.7	59.7	22.1927	387.7	4.12	0.85	1.04	2.58	600.85	8.53	17.75	8.2	1	107.062	0	0	0	1
1	56	10	1	1	0	18.59	114	75	6.3	72	19.8088	360.3	4.55	1.1	1.01	2.74	249.22	6.49	7.62	6	1	107.35	0	1	0	0
1	56	11	0	0	0	21.48	140	90	7.13	90.1	22.66	332.8	5.14	2.84	1	2.98	355.654	10.39	19.98	7.7	2	81.8568	1	0	0	0
1	56	13	0	1	0	17.97	129	93	9	114.7	25	362.2	4.95	4.68	1.17	2.36	644.585	12.02	20.62	9.5	3	61.1371	0	1	0	1
1	56	15	1	1	0	21.48	147	96	4.4	54	2.91	337.6	4.53	1.36	1.66	2.32	776.3	14.75	22.22	8.6	1	111.57	0	0	0	1
1	56	20	0	1	0	23.51	114	73	4.7	71	13.95	377.2	4.96	1.49	0.82	3.38	308.68	9.63	16.73	8.4	1	109.181	0	0	0	0
1	56	3	0	0	1	23.62	124	78	6.12	76.6	16.7063	357.2	4.38	3.17	1.05	2.46	574.943	10.77	16.53	11.3	1	99.6058	1	1	0	0
1	56	4	0	1	0	23.88	149	91	6.4	108	5.83	358.3	4.32	5.69	0.71	1.46	535.86	15.95	27.66	11.4	1	65.7518	0	0	0	0
1	56	5	1	1	0	27.1	118	81	4.36	67.3	22.9	338.1	2.93	1.24	1.06	1.84	609.193	3.6	10.55	6.1	1	116.479	1	0	0	0
1	56	7	1	1	0	22.72	130	70	4.2	84	3.42	364.5	4.89	4.11	0.9	2.73	447.48	7.37	13.57	6.7	1	89.0971	1	0	0	0
1	56	7	1	1	1	25.63	138	95	3.96	72.1	18.77	332	5.62	1.94	0.93	3.76	244.974	4.6	21.64	9.4	1	107.17	1	0	0	0
1	56	8	0	0	0	27.47	128	76	5.3	73	22.66	382.2	5.22	3.07	0.81	2.75	253.88	11.33	18.13	10.5	1	105.575	1	0	0	0
1	56	9	1	1	0	26.71	138	87	7	57.6	29.5023	355.6	3.01	1.42	0.75	1.89	702.96	12.73	21.59	9.2	1	108.65	0	0	0	0
1	57	1	0	1	0	30.47	129	78	8.09	148.8	11.43	375.4	3.11	2.02	1.07	1.35	511.004	5.27	19.11	7.3	3	44.3189	1	0	1	0
1	57	10	1	0	0	29.65	112	65	5.86	87.4	8.85	336.1	6.13	1.62	1.12	4.63	434.224	11.31	23.83	10.2	2	84.3294	0	0	0	0
1	57	10	0	0	1	26.01	135	77	4.46	82.5	19.0899	365.5	4.19	2.74	0.78	2.58	560.046	3.52	15.16	8.2	1	90.4219	0	0	0	0
1	57	11	1	1	0	21.78	109	71	7.2	73	1.28997	379.3	4.17	3.41	0.83	1.94	481.7	12.87	15.87	10.2	1	104.836	1	0	0	1
1	57	15	0	0	1	19.03	137	80	5.17	65.8	5.53	351.8	4.64	1.15	1.18	3.6	509.97	5.73	15.93	6.3	1	118.859	0	0	0	0
1	57	20	1	0	0	20.81	159	75	16.86	197.8	96.67	334.5	5.32	3.57	1.05	2.69	516.758	5.09	12.26	7.7	3	31.4144	0	1	1	1
1	57	20	1	1	0	22.03	131	88	5.1	69	12.6341	350.1	5.37	1.96	1.03	3.74	389.45	10.43	20.1	9.1	1	112.227	0	1	0	0
1	57	3	1	1	0	26.93	132	81	5.4	77	19.92	341.9	5.21	1.6	1.52	3.4	497.643	11.02	18.38	11.4	1	98.2877	0	0	0	0
1	57	5	1	1	0	17.48	119	78	4.8	86.6	21.75	384.5	4.02	2.07	0.77	1.97	695.967	4.37	11.97	6.3	2	85.2721	1	0	0	0
1	58	15	1	1	0	28.73	130	80	3.8	86	20.3691	379.5	5.34	1.37	0.94	3.78	295.04	6.15	11.08	6.6	1	85.39	1	0	0	1
1	58	5	1	1	0	25.24	130	80	4.65	69.8	7.2	337.6	5.27	3.98	0.9	3.12	220.159	4.56	8.54	5.8	1	109.899	0	0	0	0
1	58	6	0	0	0	21.48	127	77	6.24	58.6	4.81	336.7	5.48	2.19	1.13	3.62	362.175	9.48	17.34	7.1	1	106.379	1	0	0	0
1	58	7	1	1	0	22.15	151	82	5.84	79	6.04	334.8	4.44	3.89	0.96	2.22	286.314	3.32	15.93	7.3	1	94.6203	0	0	0	0
1	58	8	1	1	0	24.91	138	76	4.72	69.9	3.12	353	5.32	1.05	1.33	3.95	767.802	6.34	17.52	9.1	1	109.709	0	0	0	0
1	58	8	0	1	0	30.36	139	76	5.16	79.1	11.69	330.1	4.28	1.6	1.16	2.35	622.725	3.8	12.41	6.1	1	94.4757	0	0	0	1
1	58	8	0	0	0	34.22	142	80	4.5	67	22.66	367	4.4	1.67	1	2.84	436.03	4.45	12.07	6.2	1	115.476	1	1	0	1
1	59	0.1	1	1	1	27.82	134	85	6.48	74.3	11.32	367.2	6.2	1.65	0.98	4.73	681.369	11.2	23.09	11.8	1	101.19	1	0	0	0
1	59	0.25	0	0	0	34.93	117	68	5.22	107	3.56	333.6	4.88	1.18	1.04	3.24	475.775	4.71	4.96	5.9	2	65.1088	0	0	0	0
1	59	0.6	0	0	0	26.29	132	73	8.03	76.4	3.35	354	4.05	0.89	1.04	2.77	711.117	5.46	11.27	6.5	1	97.8374	0	0	0	0
1	59	1	1	1	0	23.56	190	114	4.74	70	26.76	386.3	6.88	4.28	1.53	3.48	510.899	6.74	20.92	7.8	1	108.753	0	0	0	0
1	59	10	0	1	0	24.03	110	70	12	72	4.57772	365.5	3.38	0.53	1.8	1	674.72	9.99	15.18	7.6	1	105.111	0	0	0	0
1	59	10	1	0	0	26.73	119	71	6.8	65	13.59	365.7	3.5	1.04	0.96	2	724.48	5.08	6.97	4.9	1	118.947	0	0	0	1
1	59	13	1	1	0	24.84	110	70	7.4	87.6	26.28	338.9	4.4	1.83	0.98	2.5	383.5	7.57	22.33	7.9	1	82.9234	0	0	0	0
1	59	14	1	1	0	22.14	145	85	3.1	64.6	22.66	369.7	2.92	1.59	0.66	1.85	256.77	12.45	16.53	7	1	119.838	0	1	0	0
1	59	18	1	1	0	23.12	128	76	5.8	79.6	5.06	375.8	3.02	0.94	1	1.69	775.739	6.09	15.24	6.9	1	93.1024	0	0	0	0
1	59	2	1	0	1	26.11	136	68	3.7	79.9	8.93	338.7	4.48	1.07	1	2.96	505.08	4.59	10.49	5.7	1	92.6799	1	0	0	0
1	59	20	1	1	0	24.61	140	95	5.5	67	16.5946	368.1	4.28	1.02	1.44	2.24	332.5	22.42	32.51	11.9	1	114.667	0	1	0	1
1	59	20	1	0	0	24.88	138	81	4.2	77	12	352.5	4.53	0.91	1.25	2.9	476.11	7.39	17.32	7.7	1	96.9164	0	0	0	1
1	59	3	0	0	1	20.08	130	80	4.21	99.2	10.52	345.4	3.97	1.11	0.79	3.26	752.499	6.93	17.05	9	2	71.3481	0	0	0	0
1	59	5	0	0	0	24.03	171	86	4.96	83.1	21.1538	343.5	4.92	1.7	0.93	2.77	721.32	6.72	12.84	6.8	2	88.3827	0	1	0	0
1	59	6	0	0	0	22.43	151	81	5.02	80.4	9.41202	375.4	6.11	4.72	1.1	3.3	786.042	7.61	15.1	7.9	1	91.9836	1	0	0	0
1	59	9	0	1	1	18.65	120	80	6.83	71.1	3.75	353.6	5.02	0.62	1.19	2.78	398.99	4.41	9.96	5.7	1	106.722	0	0	0	0
1	59	9	0	0	1	21.88	110	70	4.86	74.2	7.43	361.3	6.08	19.65	0.8	1.16	605.498	6.25	13.13	6.2	1	101.355	0	0	0	0
1	60	0.1	0	1	0	23.5	110	70	4.6	57.7	24.5227	326.6	4.35	2.19	0.91	2.72	466.96	9.84	18.6	10.3	1	105.564	1	0	0	0
1	60	0.1	0	1	0	23.44	136	92	7.8	73	21.75	334.3	4.25	3.5	0.91	1.8	371.47	6.51	16.7	6.8	1	102.649	1	0	0	1
1	60	0.5	1	1	0	20.7	135	79	4.9	72.3	22.66	345.4	5.03	1.79	0.91	2.95	306.8	7.12	10.72	8	1	103.852	0	0	0	0
1	60	0.5	0	0	1	23.14	124	68	7.87	94.4	5.67	372.7	4.36	1.14	1.06	3.09	641.649	4.73	6.16	5.7	2	75.2268	0	0	0	0
1	60	1	0	1	0	21.72	135	60	4.68	82.9	1.77	327.5	4.59	2.28	1.27	2.27	376.57	2.88	5.02	5.5	1	88.02	0	0	0	0
1	60	10	0	0	0	26.71	125	80	5.2	63	22.66	369.8	2.99	0.79	0.72	1.86	289.42	9.98	18.72	10.2	1	122.662	0	0	0	0
1	60	12	1	0	0	25.15	147	82	3.97	66.1	8.7	340	2.99	0.77	1	1.69	729.152	10.17	20.81	9.6	1	115.742	1	0	0	0
1	60	2	0	1	0	23.34	130	60	8.2	63	3.29	348.4	5.22	2.41	0.82	3.61	939.467	10.93	20.48	9.8	1	122.662	1	1	0	0
1	60	20	0	0	1	25.15	160	100	7.83	102.6	2.53	346.4	2.16	0.34	1.01	1.13	168.077	6.75	13.8	7.8	2	68.02	0	1	0	1
1	60	20	1	1	0	28.08	130	72	4.9	55	5.2	329.7	3.2	3.78	1.08	1.16	377.85	5.31	13.24	6.4	1	107.664	1	0	0	0
1	60	3	0	0	0	21.5	150	76	11.6	153.9	2.83	359.8	3.96	1	0.96	2.47	721.611	4.65	10.01	7	3	41.6622	0	1	1	1
1	60	3	0	0	0	20.57	124	79	7	63	13.12	339	3.99	0.8	1.08	2.46	668.46	12.68	22.68	10.7	1	122.662	0	0	0	1
1	60	3	0	0	1	23.44	149	77	3.88	71.7	8.74	352.3	3.65	1.35	1.09	2.45	214.723	7.78	12.59	7.4	1	104.904	0	0	0	0
1	60	4	1	1	0	23.05	110	70	7.2	32	22.66	378.3	5.81	15.68	0.69	1.49	718.31	9.79	21.05	7.9	1	134.506	0	0	0	0
1	60	7	0	0	0	25.82	152	70	4.32	62.7	25	346.5	5.68	1.55	1.57	3.84	487.784	6.74	14.88	7.6	1	123.372	1	0	0	0
1	61	0	1	1	0	24.77	128	80	5.84	64.4	4.34	388.6	4.54	5.47	0.87	2.42	448.951	10.58	22.28	9.1	1	118.61	1	0	0	0
1	61	1	1	0	0	21.34	109	59	5.18	85.9	5.91439	329.2	5.28	2.81	0.82	3.57	405.359	9.79	25.27	10.8	2	83.727	1	0	0	0
1	61	13	1	1	0	25.1	121	66	4.2	64	22.66	360.2	5.78	3.92	0.95	3.04	592.85	12.38	18.87	9.3	1	119.507	1	0	0	1
1	61	15	1	1	0	23.05	145	90	5.2	78.1	22.66	386.6	3.48	4.76	0.81	1.44	349.92	12.66	17.35	9.9	1	93.9395	0	0	0	0
1	61	20	1	1	0	24.77	160	77	6.42	71.2	23.35	378.5	3.97	1.21	0.99	2.1	557.468	8.6	16.05	6.4	1	105.055	0	0	0	1
1	61	21	0	1	0	22.89	136	81	6.1	102	23.8563	369	4	1.8	1.04	2.29	584.01	9.99	22.68	9	1	68.0245	1	0	0	0
1	61	6	0	1	0	20.55	130	80	5.49	74.4	8.86	365.3	4.15	1.43	0.99	2.833	479.681	6.44	15.12	6.8	1	99.6166	1	0	0	0
1	61	6	1	1	0	26.4	140	77	6.03	83.8	20.5	378.2	5.8	3.48	1.03	3.29	360.154	8.96	17.29	6.9	2	86.2703	1	0	0	0
1	61	7	1	0	0	27.63	130	86	5.3	69	23.9077	337.4	4.7	2.2	0.95	2.72	657.61	8.31	17.53	8.1	1	109.118	0	0	0	0
1	61	8	1	0	0	21.3	160	100	5.29	89.8	5.48	352.9	4.93	1.87	1.25	3.39	359.223	7.33	20.39	10.8	2	79.351	1	0	0	0
1	61	8	1	1	0	21.08	136	88	3.8	70	25.37	363.6	2.88	1.51	0.94	1.54	438.42	6.65	13.81	6.7	1	107.236	0	0	0	0
1	62	10	0	1	0	29.17	110	70	5.9	69	22.66	345.4	4.02	1.76	0.75	2.64	405.4	11.24	19.28	9.6	1	108.354	0	1	0	0
1	62	10	0	1	0	24.22	110	70	5.09	72	6.65	343.2	2.77	1.23	0.86	1.93	569.387	10.1	19.94	8.1	1	102.919	1	1	0	0
1	62	10	0	0	0	25.39	194	91	9.9	87	12.52	353.8	6.78	10.59	0.86	2.3	863.69	17.35	27.78	9.5	1	81.8717	0	0	0	0
1	62	12	0	0	0	22.66	138	91	5.62	73.8	26.19	338.9	4.29	1.76	1.02	2.79	381.706	7.97	13.36	6.7	1	99.8924	0	0	0	0
1	62	18	0	1	0	21.48	118	65	4.8	75	12.99	347.9	5.29	0.6	1.08	3.65	636.66	5.42	16.2	7.9	1	97.9633	0	0	0	0
1	62	20	0	1	0	22.68	133	76	5.7	75	22.9218	345.5	4.85	2.12	0.98	2.88	595.39	7.56	15.97	6.2	1	97.9633	1	0	0	1
1	62	4	0	0	0	24.09	119	75	7.6	65.9	4.83	367.6	3.95	1.23	0.98	2.63	595.701	6.71	8.45	7	1	114.546	1	0	0	0
1	63	0.5	1	0	0	19.78	140	78	7.18	93.2	25	377.4	5.47	1.99	1.02	3.78	395.786	10.88	21.01	9.1	2	74.8063	1	0	0	0
1	63	0	0	0	0	29.09	115	89	4.57	72.2	13.54	339	4.31	1.38	0.98	2.58	704.427	6.74	19.24	8.8	1	101.857	0	0	0	0
1	63	10	0	0	0	30.82	117	74	5.35	88.3	23.33	375.3	2.99	1.6	0.93	1.78	399.682	11.91	21.69	8.1	2	79.8537	1	0	0	0
1	63	20	0	0	0	29.73	130	80	3.93	70.1	9.6	327.5	4.79	1.25	1.12	3.35	221.185	8.96	20.24	7.2	1	105.557	0	1	0	0
1	63	8	0	1	0	23.05	110	70	3.8	51	10.3057	387.8	4.09	1.11	1.07	2.45	588.25	9.56	21.72	12	1	108.742	0	0	0	0
1	63	8	0	0	0	22.04	122	75	5.01	76	10.18	362.6	3.31	0.93	1.14	2.24	353.095	5.25	14.86	6	1	95.7322	1	0	0	0
1	63	8	1	1	0	17.31	179	92	5.58	70.2	3.6	378	4.96	4.48	0.83	2.26	480.736	5.75	14	6.2	1	105.376	1	1	0	0
1	64	0	1	0	0	23.01	125	71	5.8	53	22.66	333.5	5.05	2.8	0.81	2.93	733.1	9.46	18.86	8.9	1	106.287	1	0	0	0
1	64	10	1	1	0	25.97	125	65	4.74	71.6	3.47	363.1	4.47	4.12	0.92	2.13	614.756	3.91	14.63	7.8	2	102.169	1	0	0	0
1	64	10	0	0	0	27.55	121	65	8.87	53.6	22.66	331.1	4.51	1.24	1.04	2.98	507.37	11.26	19.22	10	1	105.796	1	0	0	1
1	64	13	0	1	0	25.78	121	74	4.83	76.1	2.43	362.8	4.97	1.77	0.86	3.32	107.386	11.16	22.82	10	1	94.9111	0	0	0	0
1	64	4	0	0	0	22.6	130	81	4.3	72	22.66	349.6	4.17	1.83	1.02	2.4	437.24	6.7	10.33	6.3	1	101.484	0	0	0	0
1	64	9	0	1	0	21.36	141	74	4.7	64.5	19.5367	339.6	3.54	1.26	0.9	2.06	286.29	7.82	16.68	7.8	1	115.919	0	1	0	0
1	65	1	0	0	0	20.7	138	75	5.76	75.9	4.93	389.7	4.68	6.76	0.75	1.47	498.187	5.72	11.69	6.2	1	94.547	1	0	0	1
1	65	10	0	0	0	22.6	161	80	8.9	90	28.41	345.9	5.32	1.37	1.13	3.46	354.26	6.75	20.23	8.1	1	76.9451	0	0	0	0
1	65	5	1	1	0	22.83	155	90	6.39	86.1	23.98	355.9	3.69	1.7	1	2.2	603.84	4.88	16.61	7.1	2	81.1786	0	1	0	1
1	65	7	0	0	0	19.53	127	75	6.16	78.3	7.65	381.3	5.25	1.91	0.99	3.67	501.463	6.28	14.65	7.3	1	91.0547	0	0	0	0
1	65	8	0	0	0	29.38	101	70	9.4	72	22.66	346	3.89	0.92	1.12	2.1	757.7	7.37	14.25	6.4	1	100.773	1	0	0	0
1	66	0.5	1	0	0	20.89	133	68	5.45	78.4	9.8	341.4	4.8	1.07	1.04	3.2	601.579	12.96	19.15	11.3	1	90.2779	0	0	0	0
1	66	1	0	1	0	23.81	104	62	6.6	57	21.23	342	3.57	0.51	1.57	1.59	507.88	5.34	8.02	5.7	1	101.716	0	0	0	0
1	66	17	0	1	0	28.89	127	70	7.6	121.4	6.61	363.2	3.78	1.39	1.15	2.28	379.07	8.97	20.69	7.2	3	53.2095	1	1	1	0
1	66	20	1	0	0	25.64	147	70	8.71	92.2	7.43	333.4	3.48	0.56	1.23	1.96	787.005	12.23	26.78	9	2	74.2078	0	0	0	0
1	66	20	0	0	0	24.44	140	80	6.5	85	22.66	353.1	5.01	2.04	0.97	2.92	622.96	9.23	18.98	7.1	1	81.8732	0	1	0	0
1	66	4	0	1	0	20.08	153	62	6.93	87.9	28.97	328.6	3.87	1.6	1.12	2.42	457.802	5.66	8.63	5.6	2	78.6189	0	0	0	0
1	66	8	1	1	0	20.31	151	82	6.3	83.9	14.67	343.9	3.13	1.59	0.88	1.83	272.721	6.39	19.97	7.9	2	83.1728	0	0	0	0
1	67	17	0	0	0	22.1	97	59	6.28	67.1	22.66	351.5	5.59	6.6	0.95	2.69	779.107	15.47	23.35	9.9	1	108.206	1	0	0	0
1	67	20	1	1	0	22.32	110	70	5.4	71	22.66	342.3	4.1	1.38	0.84	2.4	182.56	7.21	14.68	7.6	1	101.062	0	0	0	0
1	67	4	0	1	0	28.58	129	87	5.7	92	4.0459	360.9	6.28	1.76	1.21	3.85	428.69	5.58	10.73	6.4	1	73.8821	0	0	0	0
1	67	7	1	1	0	22.68	171	90	6	130	21.5434	357.7	4.68	1.31	1.09	2.72	680.95	7.76	13.1	6.1	3	48.6409	1	0	1	0
1	67	8	0	1	0	20.89	110	60	7.46	83.2	12.25	342.6	4.97	0.77	1.6	3.15	520.405	9.66	17.84	12	2	83.4314	0	0	0	0
1	68	0.1	1	1	0	21.56	133	84	4.75	70	2.43	373.8	4.32	1.53	0.92	3.18	617.798	5.51	18.24	9	1	102.09	1	0	0	0
1	68	15	0	0	0	23.6	158	85	4.6	55	2.86776	372.1	6.46	2.22	0.99	3.82	371.9	13.68	26.57	8.9	1	101.78	0	0	0	0
1	68	20	0	0	0	26.17	130	80	9.17	117	13.9952	334.4	4.5	1.31	1.33	2.66	266.374	21.9	33.78	9.7	3	54.862	0	0	1	0
1	68	20	0	0	0	27.69	171	70	3.82	89.3	20.7522	373.6	4.46	1.37	0.99	2.4	693.272	7.41	17.57	8.1	2	76.0551	1	0	0	0
1	68	20	1	1	1	30.38	124	73	4.85	84.8	24.76	372.9	8.44	16.52	0.82	2.08	500.364	9.41	18.16	7.2	2	80.9613	1	1	0	1
1	68	20	1	1	0	20.83	140	69	6.7	69.7	22.1401	331.1	2.89	1.18	1.14	1.21	392.99	9.72	15.17	10.3	1	102.622	1	0	0	0
1	68	8	0	0	0	23.11	130	70	7.04	86.5	24.417	364.6	3.51	2.09	0.8	2.09	649.027	5.74	15.44	6.7	2	79.0416	0	0	0	0
1	69	0.5	1	0	0	19.17	140	87	7.7	112	3.19	374.3	5.13	3.41	0.9	3.02	362.268	9.84	22.3	11.2	3	57.4318	1	0	1	0
1	69	10	1	0	0	20.44	109	49	7.1	95	18.0477	375.5	3	0.78	1.12	1.25	288.09	4.34	11.25	6.5	1	70.0792	0	0	0	0
1	69	10	1	1	0	24.14	147	64	7.13	74.5	3.22	342.5	4.92	3.11	0.86	2.92	574.435	4.01	6.67	6.1	1	94.02	1	0	0	0
1	69	16	0	0	0	20.03	133	66	6.61	70.5	8.41	365.3	4.1	1.8	1.23	2.44	766.417	5.85	15.69	6.6	1	100.507	1	0	0	0
1	69	2	1	0	0	22.6	146	80	6.4	62	7.82	343	5.54	1.05	1.88	2.16	303.36	10.5	19.74	10.6	1	117.397	0	0	0	0
1	69	22	0	1	0	18.49	122	66	5.3	75	19.1848	360.7	3.82	1.29	1.24	1.93	804.24	14.15	24.48	9.2	1	93.2627	0	0	0	1
1	69	22	0	1	0	21.23	122	66	5.3	75	12.0878	360.7	3.82	1.29	1.24	1.93	804.24	14.15	24.48	9.2	1	93.2627	1	0	0	1
1	69	3	0	0	1	23.83	148	84	5.14	70.8	3.71	387.7	3.25	2.28	0.59	2.07	265.515	4.96	16.43	6.2	1	99.9924	0	0	0	0
1	69	5	1	0	0	21.05	139	81	6.6	67.9	16.018	371.6	4.76	1.49	1.05	2.71	673.11	8.92	16.69	7.4	1	105.178	1	0	0	0
1	70	0	0	0	0	20.43	155	79	8.9	126	25.5989	337.5	8.05	1.35	1.31	5.72	507.7	7.9	15.76	9.1	3	49.4605	0	0	1	0
1	70	1	0	0	0	25.33	168	78	4.93	58.6	3.65	326.1	5.67	1.2	0.8	3.93	721.581	6.86	12.63	11.1	1	97.7791	1	0	0	0
1	70	11	0	0	0	21.48	108	71	6.7	61	5.90636	340.2	3.66	1.15	0.81	2.17	224.77	13.49	25.15	9.9	1	96.1793	0	0	0	1
1	70	15	0	0	0	23.23	120	70	9.1	79.3	5.05	379.9	3.07	1.2	0.76	1.57	351.53	14.63	25.82	10.1	1	86.5735	0	0	0	1
1	70	15	1	0	0	18.67	130	80	6.69	82.9	2.77	358.3	3.08	1.55	0.78	1.94	673.362	9.11	17.41	6.5	2	82.0491	0	0	0	1
1	70	30	0	1	0	26.31	130	69	5	78	5.15	347.2	3.95	0.93	1.24	2.23	872.9	10.8	18.53	8	1	88.321	0	0	0	0
1	70	8	0	1	0	23.26	130	78	5.74	87.3	3.5	340.3	4.54	1.87	0.92	2.34	311.906	7.04	16.68	7.1	2	77.0762	0	0	0	1
1	71	0.25	0	0	0	29.74	160	81	6.5	86.3	20.9908	348	4.92	2.81	1.09	2.79	863.17	10.7	9.68	8.4	1	77.6102	0	0	0	0
1	71	0	0	1	0	31.04	120	72	10.2	62.6	10.63	372	4.8	1.07	1.24	3.73	471.361	11.22	28.61	12	1	114.419	0	0	0	0
1	71	1	0	1	0	34.17	132	73	4.96	93.9	18.785	371.2	4.12	1.35	0.75	2.9	387.112	11.31	23.19	13.6	2	70.0814	0	0	0	0
1	71	10	0	0	0	17.58	110	65	7.6	88.1	2.32631	346.7	3.57	3.15	0.79	1.48	325.99	4.94	13.04	6.7	1	75.6972	1	0	0	0
1	72	19	0	0	0	22.58	135	80	10.4	90.7	19.933	340.8	4.02	1.83	0.9	2.36	585.767	6.82	16.97	7	2	72.5701	1	1	0	0
1	72	20	0	0	0	25.39	130	82	5.68	86.9	22.66	333.2	3.86	1.55	1	2.43	561.324	3.77	16.89	7.7	2	76.4241	0	1	0	0
1	72	20	0	0	0	24.17	138	66	11.23	124.1	75	385.2	2.59	2.36	0.76	1.35	613.456	15.48	29.84	8.9	3	49.6747	1	0	1	0
1	72	3	0	0	0	19.81	120	60	4.8	59.2	13.3498	370.5	4.63	1.39	0.83	3.18	470.83	14.51	21.41	11.1	1	96.0122	1	0	0	0
1	72	5	0	1	0	26.49	112	54	6.61	93.9	8.65	376.5	4.01	1.16	0.91	2.82	332.964	7.45	17.52	9.6	2	69.5909	0	1	0	0
1	73	16	0	0	0	21.37	125	80	6.28	83.5	2.48	347	4.44	0.81	1.13	3.26	369.813	4.09	11.53	7.2	2	79.6407	0	0	0	0
1	73	2	0	0	0	21.64	160	76	5.56	89.2	6.51	354.8	5.41	1.94	0.91	3.14	585.984	4.91	10.86	7.3	2	73.5298	1	0	0	0
1	73	7	0	0	0	21.48	130	70	3.92	60.7	23.18	347.7	2.07	1.26	0.57	1.12	580.76	7.6	21.47	8.6	1	94.3646	0	0	0	0
1	73	8	0	0	0	28.4	152	80	7.54	101	10.73	364.4	4.45	1.16	1.1	2.63	670.912	3.52	16.06	6.5	2	63.2746	0	0	0	0
1	74	0.5	1	1	0	23.83	133	76	5.3	73.1	10.94	365.7	5.79	3.78	0.83	3.51	850.374	5.54	15.45	6.9	1	92.8811	0	0	0	0
1	74	11	0	0	0	29.73	139	80	4.85	84	22.47	372.6	4.74	2.17	0.85	3.33	444.479	3.97	13.8	7.7	1	78.5145	1	0	0	0
1	74	15	1	0	0	21.88	153	74	7.56	85.5	6.54	337.6	4.69	1.95	1.08	3.25	408.944	7.45	15.76	9.6	1	76.8522	1	0	0	0
1	74	15	0	0	0	22.03	143	84	5.42	79.7	26.5796	353.5	4.53	1.03	1.15	2.74	657.942	10.12	23.39	10.2	1	83.6643	1	0	0	0
1	74	18	0	0	0	22.86	121	61	8	91.8	3.56	347.4	4.08	0.9	1.23	2.67	459.483	7.8	15.29	9	2	70.5223	0	0	0	0
1	74	3	0	0	0	19.22	140	68	3.55	69	17.1638	326.1	4.39	2.14	0.87	2.81	726.246	6.86	20.39	8.7	1	99.5944	1	0	0	0
1	75	1	0	1	0	26.72	156	86	5.3	85.2	22.66	363.7	5.23	1.18	1	3.71	494.084	7.73	17.32	7.3	2	76.6393	1	0	0	0
1	75	10	1	0	0	27.69	156	75	7.21	83.8	20.93	331.9	4.36	0.72	1.11	3.09	325.822	6.23	14.75	6	2	78.1899	0	0	0	0
1	75	10	1	0	0	23.88	89	53	6.1	142.2	19.95	366.2	3.83	2.92	0.78	2.27	606.573	3.87	11.96	7.1	3	41.257	1	0	1	1
1	75	10	0	0	0	23.71	162	78	7.45	120	9.41	381	3.62	2.15	0.61	2.37	560.479	6.14	18.68	7.6	3	50.655	0	0	1	0
1	75	15	0	0	0	20.55	169	81	4.5	75.3	22.66	358.3	5.45	2.42	0.76	3.67	532.562	12.11	21.9	9.7	1	88.9831	0	0	0	0
1	75	20	1	0	0	40.51	168	69	9.12	126.1	104.16	378.7	5.36	1.41	1.59	3.18	553.42	13.1	29.66	11	3	47.7077	0	0	1	0
1	75	5	0	0	1	21.6	129	51	5.5	92.7	8.38	363.6	3.11	1.29	0.82	1.94	466.168	9.38	23.35	10.9	2	69.2075	0	0	0	0
1	75	6	1	0	0	24.22	148	71	6.46	94.4	26.42	328.5	3.26	1.37	0.95	1.92	706.849	7.93	17.41	7.4	2	67.7036	1	0	0	0
1	76	10	0	0	0	23.8	125	68	6.33	87.7	7.7	346.5	3.24	0.53	0.87	2.18	569.512	8.09	20.7	8	2	73.4878	0	0	0	0
1	76	10	0	0	0	25.39	140	75	11.39	107.7	11.03	353.1	2.85	0.89	1	1.51	715.001	3.81	12.79	5.9	2	57.3262	0	0	1	0
1	76	20	0	0	0	32.81	127	67	8.7	79	2.43	374.3	3.37	0.68	1.1	1.78	762.85	6.74	14.62	7.3	1	83.3817	0	1	0	1
1	76	21	0	0	0	21.48	157	67	9.2	97.6	28.97	389.4	4.92	1.37	0.68	3.32	631.323	5.77	18.3	7.7	2	64.5739	1	0	0	0
1	77	8	1	0	0	31.64	136	68	8.39	108	116.06	377.6	4.24	3.18	1.01	1.81	674.369	8.43	20.25	8.7	2	56.7338	0	0	1	0
1	78	10	1	0	0	22.72	166	70	6	75.3	3.19	328.3	3.34	1.82	1.13	1.97	419.131	9.27	21.08	9	1	87.1275	1	0	0	0
1	78	11	0	0	0	34.72	120	70	10.35	155.5	5.27	349.6	4.51	1.16	1.41	1.95	506.317	6.05	12.65	5.9	3	36.2575	0	0	1	0
1	78	20	1	0	0	20.94	117	75	6.44	68.5	19.82	362.5	3.34	1.24	1.03	2.08	581.492	15.82	28.81	11.7	1	97.6901	0	0	0	0
1	78	30	1	1	0	28.08	130	73	4.99	68	27.08	377.5	4.69	1.13	1.13	3.4	443.968	6.9	18.88	8.9	1	98.5592	1	0	0	0
1	78	6	0	0	0	20.34	147	80	6.3	86	6.17928	352.7	5.87	1.84	1.14	3.67	254.23	7.41	15.3	7.6	1	74.1979	1	0	0	0
1	79	10	0	0	0	20.43	107	62	6.38	82	12.0012	335	3.29	1.99	0.81	2	586.755	7.18	16.24	6.9	2	78.0457	0	0	0	1
1	79	10	0	0	0	26.44	162	77	4.85	70.9	2.26471	368.4	3.77	1.3	0.96	2.56	550.734	7.55	13.78	5.9	1	93.0504	1	0	0	0
1	79	13	0	0	0	28.2	135	76	4.63	81.1	6	339.8	3.18	0.62	0.86	1.52	418.534	4	12.58	6.5	1	79.094	0	0	0	0
1	79	20	1	0	0	21.26	147	60	9.49	106	15.62	365.6	4.67	0.91	1.97	2.34	612.34	4.21	18.35	5.8	3	57.2209	0	0	1	0
1	80	10	0	0	0	22.41	137	59	9	103	19.933	338.4	2.4	0.91	1.03	1.03	448.4	5.55	16.06	7.6	3	58.8273	0	0	1	0
1	80	10	1	1	0	32.05	146	78	8.84	72.6	21.3819	360.4	3.45	1.69	0.95	1.63	468.1	3.59	11.13	5.7	1	89.7897	0	0	0	0
1	80	22	0	1	0	32.05	147	72	7.79	73.3	8.64666	368.1	6.95	2.44	1.24	4.88	522.013	17.7	30.56	12	1	88.7541	0	0	0	0
1	81	20	0	0	0	21.23	145	85	8.32	114.6	57.5	347.9	5.16	1.45	1.04	3.39	395.429	9.18	19.71	7.5	3	51.3445	0	0	1	0
1	82	2	0	0	0	24.22	139	57	7.42	112.4	6.84	378.7	4.4	1.91	1.23	2.74	524.604	4.93	12.84	5.8	3	52.1941	0	0	1	1
1	82	20	0	0	0	21.88	143	61	8.7	89.8	22.66	363.9	4.26	0.91	1.06	2.52	373.99	7.99	25.3	9.2	1	68.4678	1	0	0	0
1	83	0	0	0	0	24.88	138	95	7.3	72.4	19.3207	349.9	4.95	1.52	0.92	2.96	648.3	15.18	21.4	11.5	1	88.211	1	0	0	0
1	84	3	0	0	0	23.05	154	78	8.96	94.8	13.12	343.4	5.35	1.94	1.36	3.22	759.464	13.23	27.02	12.2	2	63.2317	1	0	0	0
1	88	4	0	0	0	22.43	99	58	6.9	140	19.4694	373.6	2.5	0.89	0.73	1.61	497.88	7.49	15.34	8.7	3	38.3729	0	0	1	0
1	51	6	1	1	0	25.82	137	92	5.3	76.7	22.66	389.9	5.49	3.37	0.88	3.56	409.35	7.9	16.34	7.9	1	103.004	1	0	0	0
1	54	10	0	0	0	24.97	127	84	7.9	88.5	25.9656	385.4	4.95	2.54	1.12	2.92	411.14	7.13	12.77	7.1	1	84.8329	1	1	0	0
1	55	0.2	1	0	0	24.3	151	106	6.3	60.5	24.72	377.8	4.81	5.23	0.78	2.21	438	9.03	16.42	8.8	1	107.229	0	0	0	0
1	84	0	0	0	0	22.21	170	66	4.6	71	5.54509	389.3	7.04	1.4	1.12	5.56	881.64	7.43	18.49	7.1	1	89.686	0	0	0	0
1	44	1	0	1	1	22.03	120	80	6.31	66.2	11.0743	348	4.33	1.19	1.14	3.01	250.032	5.53	14.07	6.7	1	129.273	0	0	0	0
1	44	1	0	1	1	36.79	120	80	6.51	62.6	19.25	377.6	4.66	2.41	0.87	3.06	583.904	7.96	13.39	10.1	1	138.314	0	0	0	0
1	54	0.5	1	1	0	21.88	131	83	3.8	72	28.5445	364.8	5.5	5.07	0.89	2.06	505.01	9.89	18.5	9.7	1	108.869	1	0	0	0
1	54	0.5	1	1	0	25.15	131	83	3.8	72	21.1313	364.8	5.5	5.07	0.89	2.06	505.01	9.89	18.5	9.7	1	108.869	1	0	0	0
1	18	3	1	1	0	24.3	136	86	5	65	22.66	470.1	6.06	1.09	1.28	4.53	329.1	5.77	13.25	5.9	1	158.648	1	0	0	0
1	20	0	0	0	0	33.71	122	78	3.9	67	1.95	571.2	5.36	4.39	1.07	3.01	533.45	7.96	15.88	8.3	1	150.806	0	0	0	0
1	21	0	1	0	0	22.83	130	84	4.78	73.2	8.91	463.3	5.2	2.3	0.78	3.46	600.545	8.81	18.58	8.3	1	134.555	0	0	0	0
1	22	0.1	0	1	0	23.38	140	77	3.66	58.9	10.42	458.3	4.78	3.78	0.86	2.91	510.078	9.12	21.75	12.4	1	136.701	1	0	0	0
1	24	0	1	1	0	26.17	106	69	7.8	93.6	22.66	817.5	5.6	8.51	0.94	2.12	342.949	23.46	27.69	19.6	1	97.8743	0	0	0	0
1	24	1	1	0	0	22.04	116	73	4.6	69.5	16.8372	397	3.35	2.23	0.57	2.14	437.47	4.44	7.63	5.2	1	140.275	0	0	0	0
1	25	0.2	0	0	1	22.22	120	78	4.51	62.6	4.47892	465.3	6.76	1.96	1.26	4.9	673.053	17.7	26.92	13.2	1	158.064	1	0	0	0
1	25	0.3	1	1	0	28.33	160	106	4.5	45.6	15.38	399.1	6.08	1.73	0.91	4.39	528.3	14.2	24.47	12	1	148.697	1	0	0	0
1	25	0.5	0	0	0	34.17	132	57	4.6	76	19.9348	444.6	4.54	0.91	1.23	2.7	5654.3	4.04	12.05	5.3	1	125.022	0	0	0	0
1	26	0.1	0	0	0	24.01	160	90	5.96	73.8	8.87	582.7	4.17	7.71	0.73	1.43	575.459	5.15	16.24	13	1	128.635	1	0	0	0
1	26	0.25	1	0	0	26.62	123	78	4.2	65	3.81	401.2	4.89	2.99	0.89	3.44	600.793	11.01	20.02	9.9	1	149.978	0	0	0	0
1	26	0	0	0	1	20.28	135	63	3.97	50.9	15.4	405.2	4.34	10.21	0.56	1.43	549.261	8.85	12.74	10	1	141.132	1	0	0	0
1	27	0	1	1	0	26.49	154	118	4.1	77.7	11.6234	460.1	3.17	5.14	0.5	0.98	824.83	8.41	19.31	10.4	1	120.024	1	0	0	0
1	28	5	1	0	1	18.97	118	73	4.94	59.5	3.69	440.7	5.99	3.74	0.82	4.54	577.328	16.34	25.39	11.7	1	130.514	1	0	0	0
1	29	0.1	0	1	0	22.58	128	87	3.9	64	2.26471	688.9	4.35	2.6	0.8	2.75	708.49	9.67	14.46	9.1	1	149.629	1	0	0	0
1	29	0.2	0	0	1	23.81	145	86	5.7	41.9	23.43	506.8	8.31	24.24	0.66	1.37	905.62	14.31	22.35	12.4	1	149.693	1	0	0	0
1	29	0	1	0	0	29.14	151	98	3.8	56.1	3.53	474.7	5.07	3.92	0.68	2.77	642.48	13.12	24.06	12.4	1	132.773	0	0	0	0
1	29	1	1	1	0	33.87	105	69	1.6	48	22.66	477.5	7.7	11.02	0.51	1.69	468.53	9.04	21.24	12.7	1	141.561	0	0	0	0
1	30	0.2	1	1	0	22.27	132	60	2	68	4.18	478.4	4.61	2.18	0.85	2.79	527.7	8.97	16.38	16.5	1	138.081	0	0	0	0
1	30	4	1	0	0	27.73	125	80	4.1	63	7.71843	415.7	5.4	3.14	0.92	2.9	533.38	12.68	19.97	9.9	1	151.438	1	0	0	0
1	30	6	1	1	1	25.95	112	70	4.9	61	0.398476	554.4	8.23	10.44	1.1	2.82	675.23	14.79	21.94	12.3	1	127.383	1	0	0	0
1	31	2	0	0	0	28.76	144	79	5.1	110.3	12.34	392.7	3.9	1.28	1.08	2.72	423.939	4.45	12.2	6.9	2	76.4033	1	0	0	0
1	31	2	1	1	0	24.09	115	76	4.5	55	22.66	424	7.09	13.62	0.65	1.58	637.53	9.73	18.69	9.9	1	131.99	1	0	0	0
1	31	4	1	1	0	26.57	110	70	10	107.4	22.66	453.4	4.35	2.59	0.84	2.62	153.8	9.13	15.08	7.5	1	78.9045	0	0	0	0
1	32	0	1	0	0	20.87	113	63	3.2	66.9	22.66	441.3	4.34	1.88	0.83	2.81	708.031	9.38	18.01	8.6	1	138.866	0	0	0	0
1	32	0	0	1	0	29.74	152	100	6.6	79	5.45	729	5.87	10.75	0.57	1.73	529.32	6.97	16.17	11.6	1	113.581	1	0	0	0
1	32	2	1	0	1	22.21	116	74	2.93	49.2	9.31	410.1	3.36	3.48	0.57	1.58	605.444	13.99	25.75	12.8	1	137.209	1	1	0	0
1	33	0.5	0	0	0	22.89	131	85	4.9	68	8.18	683.4	5.07	6.48	0.87	2.02	1193.64	11.61	20.43	8.2	1	135.201	1	0	0	0
1	33	0	0	1	0	22.59	171	108	4	63	22.66	457.5	6.2	2.96	1.13	4.01	1025.82	8.8	17.87	10.8	1	148.28	1	0	0	0
1	33	1	0	0	0	23.95	149	75	4.89	82.8	4.34	644.5	5.68	1.78	0.97	4.27	843.927	7.63	11.52	9.2	1	106.558	0	0	0	0
1	33	1	0	0	1	25.78	140	80	5.15	72.4	21.75	566.6	5.48	3.65	0.91	4.06	764.337	11.19	20.59	8.7	1	125.332	1	0	0	0
1	34	0	0	1	0	25.63	122	89	6.5	64	27.0646	551.8	4.11	6.01	0.71	1.66	525.34	7.8	16.78	9.4	1	144.465	0	1	0	0
1	34	1	1	1	1	29.62	109	74	9.14	84	3.97	488.9	4.24	2.69	0.78	2.68	754.709	4.87	9.28	6	1	103.987	1	0	0	0
1	34	1	1	0	0	23.63	105	70	5.6	67	26.8261	463.8	4.61	3.97	0.8	2.38	1024.63	5.16	13.71	6.4	1	136.681	0	0	0	0
1	34	1	0	0	1	28.58	140	90	4.37	78	16.611	440.1	4.36	1.84	0.92	2.57	634.255	7.5	41.83	8.7	1	113.734	0	0	0	0
1	35	0.5	0	0	1	26.04	134	76	4.3	81.9	5.83	502.6	4.02	4.66	0.77	2	749.588	8.98	21.5	9.9	1	106.469	1	0	0	0
1	35	0	0	0	0	21.16	141	101	4.5	62	2.83525	582.2	5.97	9.25	0.76	1.67	1117.93	10.42	23.88	13	1	149.067	1	0	0	0
1	35	0	1	0	0	25.39	157	97	5.2	67	22.66	482.8	4.44	1.61	1.51	2.44	222.15	9.18	18.44	10.4	1	135.725	1	0	0	0
1	35	1	1	0	0	28.76	128	74	5.6	83	12.22	412.3	4.68	2.75	0.88	3.02	413.13	7.62	12.26	8.7	1	104.765	1	0	0	0
1	35	2	1	1	0	25.72	129	85	6.8	63	15.4847	399.1	3.83	5.07	0.64	1.6	461.41	7.99	17.42	5.6	1	146.211	1	0	0	0
1	35	7	1	1	0	23.92	171	115	5.3	83	20.1704	540.5	4.23	2.88	0.8	2.36	474.74	7.77	13.17	7.7	1	104.765	1	0	0	0
1	35	8	1	1	0	22.83	109	80	7.5	86.1	22.66	427.9	4.76	5.84	0.77	1.79	430.76	17.8	25.76	11.3	1	100.222	1	0	0	1
1	36	0.25	1	0	0	19.52	113	58	6.5	77.9	5.75	399.5	3.34	0.75	0.79	2.37	888.699	3.34	9.54	5.2	1	112.322	0	0	0	0
1	36	0	0	0	1	25.53	123	75	3.79	79.5	24.73	526.6	5.84	1.99	1.24	4.28	643.103	12.09	26.15	12.8	1	109.594	1	0	0	0
1	36	1	0	0	1	24.54	165	90	4.55	96.3	5.6	473.8	7.09	4.54	1.17	4.03	682.254	12.84	21.04	11.3	2	86.9216	0	0	0	0
1	36	8	0	0	0	35.34	142	90	6.6	76	22.66	555.7	6.15	3.48	0.98	3.75	552.9	9.27	14.04	7.6	1	115.725	1	0	0	0
1	37	2	1	1	0	20.83	130	67	7.1	87	16.116	454.6	4.78	3.56	1.15	2.33	397.56	9.38	17.25	8.4	1	97.5894	0	0	0	0
1	38	0.5	0	0	0	24.44	130	70	4.6	59	24.4241	418.1	4.35	1.38	0.96	2.94	599.64	13.3	18.81	10.2	1	122.083	1	0	0	0
1	38	0	1	1	0	22.14	110	70	6.8	79	22.66	426.1	6.23	2.76	0.88	4.03	459.81	9.9	20.48	10.2	1	108.893	0	0	0	0
1	38	0	1	1	0	21.09	110	70	6.8	79	9.24295	426.1	6.23	2.76	0.88	4.03	459.81	9.9	20.48	10.2	1	108.893	1	0	0	0
1	38	0	1	1	0	19.56	139	96	6	88	4.11	485.2	6.75	4.26	0.97	3.6	645.65	14.43	23.7	16.9	1	95.5765	0	0	0	0
1	38	2	1	1	0	27.38	128	99	6.37	80.9	27.1319	473.4	4.34	1.73	1.3	2.91	706.281	9.09	19.05	12.5	1	105.809	0	0	0	0
1	38	2	1	1	0	21.36	133	86	4.6	90.4	6.04	513	6.03	2.83	1	3.64	680.22	7.7	18.1	12.1	1	92.5173	1	0	0	0
1	39	0.2	1	0	0	22.67	107	66	3.6	71.2	20.3691	485.3	5.3	1.44	1.12	3.05	361.9	9.2	19.11	9	1	122.612	1	0	0	0
1	39	0.5	0	0	0	23.03	100	80	6.7	55	22.66	536.2	7.76	16.34	0.67	1.13	906.89	20.26	31.44	12.9	1	124.778	1	0	0	0
1	39	2	0	1	0	21.03	154	87	3.9	78.4	22.66	395.5	4.72	1.44	0.88	3.24	346.36	15.39	29.35	10	1	109.132	1	0	0	0
1	39	2	1	1	0	22.86	138	96	4.76	70.9	8.78	461.9	4.97	3.54	0.97	3.32	457.907	6.69	14.95	6.8	1	123.239	1	0	0	0
1	39	2	1	0	0	22.31	110	70	4.4	70	27.1434	661.5	4.75	4.3	0.81	2.4	838.17	12.09	22.79	12.5	1	125.157	0	0	0	0
1	39	3	0	0	0	23.05	129	82	5.7	72.3	22.1669	490.5	4.37	4.06	0.92	1.43	579.81	7.62	16.75	7.5	1	120.36	0	0	0	0
1	39	3	1	0	0	22.43	139	84	5.8	67	22.66	416.8	4.19	2.6	0.72	2.58	834.8	10.67	17.43	8.3	1	131.964	1	0	0	0
1	39	5	1	1	1	22.27	140	100	5.95	64.3	16.4981	436.4	5.78	5.51	0.76	2.61	555.26	11.85	18.02	10.9	1	138.692	0	0	0	0
1	39	8	1	0	1	23.95	130	70	8.01	77.9	9.53	535.9	5.42	3.64	0.87	2.69	800.587	9.8	14.02	7.3	1	109.979	0	0	0	0
1	40	0.2	1	1	0	19.03	122	78	5.1	77.3	27.9779	439.2	6.18	2.32	0.8	3.48	316.77	9.82	13.25	10.2	1	110.235	1	0	0	0
1	40	0	0	0	0	23.44	82	53	6	81.1	22.66	607.2	4.33	1.57	1.06	2.27	423.15	6.42	12.22	6.7	1	104.021	0	1	0	0
1	40	1	0	0	0	24.75	130	60	6.49	50.5	25.0097	443.7	6.34	2.36	0.91	3.86	842.887	13.05	21.47	10.2	1	128.328	1	0	0	0
1	40	2	0	1	0	23.38	126	85	4.72	54.6	7.14	600.3	5.35	4.89	0.76	3.29	737.297	5.75	12.7	6.3	1	124.276	1	0	0	0
1	40	2	0	1	0	26.67	139	98	4.1	76	11.8027	528.2	3.91	2.72	0.8	2.24	517.69	6.94	16.08	8.8	1	112.519	0	0	0	0
1	40	2	0	1	0	22.51	139	98	4.1	76	18.02	528.2	3.91	2.72	0.8	2.24	517.69	6.94	16.08	8.8	1	112.519	1	0	0	0
1	40	3	0	0	0	28.04	130	90	6.34	86.7	2.42014	437.8	5.78	3.29	0.89	3.97	466.904	11.61	18.89	8.5	1	95.9542	0	0	0	0
1	41	1	0	0	0	30.82	126	72	2.9	67	6.52	434.5	4.18	1.28	0.97	3.04	331.36	7.76	14.38	10.6	1	130.123	0	0	0	0
1	41	2	1	1	1	19.63	148	92	7.65	86.2	14.5709	402.9	4.88	3.34	0.87	2.88	904.649	8.1	16.34	8.8	2	95.9511	0	0	0	0
1	41	4	0	0	0	26.67	130	80	3.62	64	6.57	400	3.15	1.19	0.84	2.17	512.995	7.92	10.47	9.2	1	137.533	0	0	0	0
1	42	1	0	0	0	21.93	128	70	4.9	67.1	12.13	419.8	4.64	0.99	0.8	3.66	451.26	4.09	8.84	5.3	1	128.979	1	0	0	0
1	42	1	0	0	0	27.73	128	83	3.2	65	5.47	493	4.27	7.58	0.74	1.91	679.41	5.44	8.19	5.2	1	134.034	0	0	0	0
1	42	2	1	0	0	22.86	115	80	4.85	87.7	22.66	449	5.33	4.41	0.83	3.09	406.339	8.44	21.02	8.8	1	93.3128	1	0	0	0
1	42	2	0	1	0	23.01	105	80	4.47	92.7	15.43	605.1	4.97	10.77	0.94	1.53	456.418	8.22	17.12	8.5	2	87.2626	1	0	0	0
1	43	0	0	0	0	20.58	126	70	5.43	76	7.8	471.9	5.58	4.85	0.92	3.11	424.9	8.66	17.04	10.5	1	110.172	1	0	0	0
1	43	1	0	0	0	26.35	118	77	6.5	74	2.91	439	5.54	2.5	1.12	3.14	394.69	7.91	14.18	6.6	1	113.783	0	0	0	0
1	43	2	1	0	0	29.14	120	70	5.57	79.7	4.1	526.6	6.04	7.65	0.85	2.65	791.171	4.04	5.95	9.8	1	104.019	1	0	0	0
1	43	4	1	1	0	28.4	113	73	6.4	76	17.5092	560.8	4.78	1.13	0.99	3.28	585.57	4.11	12.37	6.2	1	110.172	1	0	0	0
1	44	0.1	1	1	0	31.74	110	70	3.4	89	22.66	455.5	6.29	4.08	0.91	3.54	636.42	14.29	27.4	11.4	1	90.3886	1	0	0	0
1	44	0.1	1	0	1	25.39	114	69	5.16	63.6	22.66	409.1	4.5	2.54	0.65	3.21	540.939	5.05	17.53	6.9	1	135.69	0	0	0	0
1	44	0	1	1	0	25.39	114	74	5.32	74.8	3.2	533.6	5.82	4.73	1.17	3.73	514.72	5.13	14	6.7	1	111.527	1	0	0	0
1	44	0	1	1	1	26.84	140	90	3.5	78.2	9.54	422.3	4.67	2.78	1.05	3.13	535.655	9.04	18.03	6.8	1	105.691	0	0	0	0
1	44	0	1	1	0	27.89	126	93	4.2	55	19.9862	483.3	4.51	2.52	1	2.48	715.03	12.76	21.6	11.2	1	120.471	1	0	0	0
1	44	3	1	1	0	23.83	162	103	5.81	899	108.75	488	5.12	1.44	0.8	4.08	707.788	5.75	11.04	7.6	5	5.51862	0	0	1	0
1	44	4	1	1	0	22.58	110	70	3.6	59.7	23.8327	398.9	4.39	2.75	0.84	2.19	622.73	8.87	19.82	7.8	1	116.479	1	0	0	0
1	44	5	1	1	0	24.61	129	73	5.5	85	14.7578	435	4.19	6.04	0.59	1.6	394.98	6.25	12.02	6.3	1	95.5561	1	0	0	0
1	44	6	0	1	0	28.44	110	70	5.4	54	5.72299	455.1	5.55	2	0.89	3.58	628.76	6.78	16.27	6.9	1	121.383	1	0	0	0
1	45	0.1	0	0	0	24.97	122	65	6.07	71.4	11.3637	511.9	5.08	1.76	1.08	3.52	240.7	4.58	10.52	6.4	1	117.153	0	0	0	0
1	45	0.1	1	1	0	21.23	136	89	5.1	66	18.8257	414.7	4.94	1.53	0.85	3.29	397.16	11.8	23.47	9.4	1	128.839	0	0	0	0
1	45	0.3	1	0	0	19.53	111	74	8.1	82	22.66	459.2	6.02	5.18	0.73	3.22	388.85	14.07	22.05	8	1	99.1002	0	0	0	0
1	45	0.5	0	1	0	19.43	160	100	5.4	67.4	5.01284	412.5	5.64	1.44	1.02	3.75	559.41	16.75	25.73	11.9	1	125.61	0	0	0	0
1	45	0	1	1	1	21.94	140	89	4.15	74.9	6.57	408.8	5.73	4.83	1.24	2.44	576.607	7.76	12.58	5.8	1	110.567	0	0	0	0
1	45	1	0	0	0	22.03	124	72	4.02	85.4	16.9	433.8	4.57	0.97	1.11	2.89	596.338	3.9	12.14	9.8	1	94.3502	1	0	0	0
1	45	10	0	1	0	25.17	119	70	3.73	59.2	3.61	391.8	4.89	2.55	1.09	3.36	570.563	4.06	12.9	6.9	1	116.064	1	0	0	0
1	45	10	1	0	0	24.69	138	79	5.69	110	22.66	491.2	10.39	2.53	1.45	7.06	516.301	5.83	14.3	6.7	2	69.4755	0	0	0	0
1	45	2	0	0	1	24.24	120	77	5.17	70.7	21.3441	462.6	5.01	15.22	0.84	1.64	401.52	12.47	15.19	7.4	1	118.557	1	0	0	0
1	45	2	0	0	0	26.56	120	74	6.04	22	18.1159	429.5	3.87	1.61	0.83	2.22	353.163	3.24	9.41	5.8	1	174.335	0	1	0	0
1	45	4	1	1	0	20.96	112	67	6.69	74.4	2.43	395.6	5.58	1.74	0.87	4.27	583.173	3.97	8.21	5.8	1	111.466	1	0	0	0
1	45	7	1	0	0	26.5	160	89	8.5	86.9	8.65872	434.4	5.37	3.19	0.88	3.36	563.742	5	13.08	7.8	1	92.3848	1	0	0	0
1	45	7	1	1	0	18.67	156	100	6.34	58.9	19.1288	421.8	5.03	5.61	0.78	2.34	329.655	11.01	22.96	11.9	1	116.306	1	0	0	0
1	45	9	1	1	1	22.94	135	85	7.19	117	8.04	471.5	4.51	2.23	1.33	2.89	518.079	4.75	19.71	6.8	2	64.482	1	0	0	0
1	46	0.1	1	1	1	26.71	114	70	4.76	78.5	4.26	391.2	6.49	7.48	0.75	3.47	542.754	10.17	21.74	11.8	1	103.735	1	0	0	0
1	46	0.1	0	0	0	25.07	126	85	4.61	66.8	2.5	392.5	5.38	4.27	1.75	2.15	580.918	12.14	22.62	11.2	1	126.087	1	0	0	0
1	46	0.25	0	0	0	24.56	150	85	5.22	62.9	5.69	404	6.81	5.46	1.14	3.7	613.953	7.07	12.57	5.6	1	135.599	0	1	0	0
1	46	0.7	0	0	0	23.82	118	74	6.9	67.9	1.3364	486.2	3.72	1.37	0.77	2.47	397.88	5.53	10.42	6.1	1	123.621	1	0	0	0
1	46	0	1	1	0	24.97	163	96	4.9	76	21.75	472.4	4.93	7.58	0.69	1.91	307.73	7.14	10.02	7.6	1	107.875	1	0	0	0
1	46	1	0	0	0	23.05	133	87	6.25	86.2	7.47	423.4	5.92	7.66	0.98	2.67	738.323	6.3	14.7	6.8	1	92.6395	0	0	0	0
1	46	10	1	1	0	21.21	124	72	4.62	80.4	3.82	418.3	5.1	2.62	0.87	3.4	257.683	7.27	12.87	6.8	2	100.779	1	0	0	1
1	46	16	1	0	1	21.23	113	80	8.97	94.4	13.868	444.7	3.2	2.47	0.93	1.77	490.368	10.17	20.03	7.5	2	83.001	0	0	0	1
1	46	3	0	0	0	20.24	130	80	4.32	82.3	1.3364	456.7	3.32	0.92	0.81	2	753.905	3.91	9.59	6.3	1	97.9729	1	0	0	0
1	46	5	1	1	0	31.25	110	70	6.7	42	20.6789	417.8	6.31	18.78	0.95	2.18	1039.05	10.66	22.2	10.4	1	132.713	0	0	0	0
1	46	5	0	1	0	33.2	151	93	4.25	79.7	10.28	404.3	3.74	2.38	0.94	2.47	444.113	9.89	25.63	8.3	1	101.85	1	0	0	0
1	46	8	0	1	0	20.31	142	84	5.2	72	12.2246	716.6	3.27	3.33	0.82	1.23	542.91	8.97	18.02	6.8	1	115.162	1	0	0	0
1	46	8	0	0	0	21.08	102	65	8.39	84.7	3.66	413.1	4.62	4.25	0.88	2.37	249.711	12.77	17.31	9.1	2	94.6267	1	1	0	0
1	47	0.1	1	1	0	20.54	107	81	5.8	73	14.7422	593.4	5.77	5.44	0.8	2.86	784.59	12.94	28.99	9.3	1	112.465	1	0	0	0
1	47	0.2	1	1	0	19.81	144	95	4.5	87	14.8222	421.9	4.4	1.47	0.82	2.82	355.64	7.47	19.46	9.9	1	90.9693	1	0	0	0
1	47	0	0	0	0	18.08	173	115	4.9	55	22.66	527.1	5.49	6.83	0.79	2.21	379.09	11.13	14.21	9.4	1	117.959	1	0	0	0
1	47	1	0	0	0	23.71	150	95	6.5	77	10.069	633.3	7.25	2.96	1.19	4.68	1133.35	8.72	23.19	9.2	1	105.44	0	0	0	0
1	47	2	1	1	0	23.19	127	90	3.6	57.9	23.17	399.6	5.34	5.33	0.87	2.05	593.64	7.8	16.79	7.3	1	115.494	0	0	0	0
1	47	3	1	1	0	24.02	127	88	4.7	67	3.98	435.5	4.93	4.81	0.7	2.24	639.78	16.51	29.23	11.9	1	124.753	0	0	0	0
1	47	3	1	0	0	22.22	130	80	3.85	74	8.26	491	3.17	3.81	0.79	1.7	632.312	8.88	16.58	7.7	1	110.63	1	1	0	0
1	47	4	1	1	0	17.97	120	85	4.4	63.8	2.87	391.4	4.64	8.7	0.66	1.66	758.317	9.56	17.58	7	1	132.357	1	0	0	0
1	47	5	0	1	0	23.05	105	80	5.9	66	5.54509	408.3	4.64	1.73	0.88	3.09	464.53	12.7	25.46	11.3	1	127.041	0	0	0	0
1	47	5	0	0	0	25.53	134	85	5.2	74	22.66	438.9	2.84	1.8	0.89	1.4	479.61	5.93	10.26	5.9	1	110.63	1	0	0	0
1	47	6	1	1	0	29.43	110	68	5.2	79	10.5515	420.7	5.31	2.17	0.83	3.48	363.22	10.34	18.06	7.6	1	102.222	1	0	0	0
1	47	7	1	1	0	20.03	121	76	4.48	56.2	7.72	397.5	5.8	4.14	0.94	3.78	454.157	8.4	17.49	7.4	1	116.917	0	0	0	0
1	48	0.25	0	0	0	28.35	110	70	6	79	7.93	495.4	4.7	3.03	0.69	2.75	734.55	14.33	31.19	13.4	1	101.506	0	0	0	0
1	48	0	1	0	0	19.07	129	89	3.3	70.9	19.3207	491.5	5.05	1.35	0.99	3.11	697.42	6.82	14.1	7.8	1	115.689	1	0	0	0
1	48	0	0	1	0	25.51	155	99	6.4	80	2	514.9	5.7	1.44	1.02	3.81	521.06	6.13	11.13	6.7	1	99.974	1	0	0	0
1	48	1.5	1	1	0	25	127	93	5.8	55	11.5765	395.8	5.57	1.81	1.02	3.57	808.87	6.91	12.87	6.6	1	117.133	0	0	0	0
1	48	1	0	1	0	29.14	127	86	6	72.5	22.66	404.7	6.61	16.03	0.72	1.84	836.26	8.55	14.39	8	1	112.609	0	0	0	0
1	48	12	0	0	0	23.74	110	76	2.6	47	22.66	505.2	5.96	17.01	0.6	1.36	583.84	9.41	15	7.3	1	124.95	1	0	0	1
1	48	16	1	0	0	22.77	120	88	6.71	96.3	6.49	429.1	4.14	0.56	1.33	2.63	691.147	5.98	14.1	8.1	2	79.8949	0	0	0	0
1	48	16	0	0	1	22.94	132	73	5.53	96.6	28.33	406.5	6.53	2.28	1.1	5.04	527.765	15.28	27.12	12.1	2	79.595	1	0	0	1
1	48	3	1	1	0	24.98	132	72	5.19	86.7	9.04	501	4.32	0.71	1.14	3	528.888	4.18	7.81	6	1	90.7106	1	0	0	0
1	48	3	1	0	0	30.86	104	70	5.4	60.3	22.66	422.4	6.41	11.99	0.79	2.97	479.34	7.03	12.06	6	1	112.787	0	0	0	0
1	48	4	0	0	0	20.75	120	90	6.1	97.2	19.3882	420.3	4.91	1.41	1.22	3.11	867.854	5.2	11.05	5.8	2	79.0013	0	0	0	0
1	48	4	0	0	1	24.22	138	79	5.27	69.9	1.87	404	4.33	3.39	0.88	2.59	565.819	12.32	19.09	9.6	1	117.693	1	0	0	0
1	48	5	0	0	0	26.14	116	82	5.7	72	14.7422	462.2	5.49	2.47	1.01	3.47	474.55	8.72	17.25	7.7	1	113.555	1	0	0	1
1	48	6	0	0	0	24.34	132	91	3.5	72	9.04	637.5	4.77	5.54	0.71	2.21	601.08	13.79	17.33	9.1	1	113.555	0	0	0	0
1	49	0.25	1	1	0	25.71	140	90	6.3	84	15.4	537.4	3.34	2.88	0.78	1.6	504.16	7.63	14.49	8.7	1	93.5877	0	0	0	0
1	49	0.3	1	1	0	18.65	148	90	5	71	22.66	525.6	3.9	5.05	0.76	1.43	375.15	12.2	20.24	7.7	1	114.683	1	0	0	0
1	49	1	0	0	0	23.73	120	88	7.02	82	11.4421	429.8	3.52	1.56	0.92	1.67	739.763	5.93	9.15	6.7	1	96.3543	0	0	0	0
1	49	1	1	0	0	26.71	120	70	3.75	82.8	5.6	405.8	3.19	1.23	1.01	2.02	498.514	3.37	8.45	5.3	1	95.23	1	0	0	0
1	49	10	0	0	0	23.42	156	91	7.58	88.4	5.93	432.8	5.78	1.17	1.15	4.67	662.579	3.11	14.89	6.2	2	87.9856	1	0	0	0
1	49	16	1	0	0	23.05	130	60	6.14	70	22.66	497.2	8.53	9.38	0.95	3.8	496.107	13.71	19.99	10.2	1	116.667	1	0	0	1
1	49	16	1	1	0	39.84	135	93	4.7	62	16.956	488.2	3.94	0.87	1.09	2.64	359.07	9.52	22.21	10.2	1	135.105	0	0	0	0
1	49	2	0	0	0	20.96	110	70	6.2	85.7	22.66	503.6	3.51	1	0.7	2.61	519.46	7.73	19.05	7.5	1	91.3479	0	0	0	0
1	49	3	1	1	0	24.78	110	70	5.5	48	23.1026	524.8	6.68	15.36	0.7	1.79	1081.06	11.78	20.04	8.9	1	123.006	0	0	0	0
1	49	3	0	1	0	27.69	130	76	4.21	58.3	4.44	497.2	3.98	2.33	0.92	2.44	388.107	6.42	9.05	6.6	1	113.561	1	0	0	0
1	49	4	1	1	0	32	144	78	7.91	80.6	22.66	428.5	3.28	0.84	0.97	1.93	574.561	6.53	12.48	6.3	1	98.3814	1	0	0	1
1	49	4	1	0	0	22.77	116	69	5	92.9	23.77	455.6	3.82	2.29	0.69	2.38	565.739	7.43	16.49	9.5	2	82.8593	1	0	0	0
1	49	5	1	1	0	19.63	115	80	3.3	72.5	11.9874	658.5	3.78	1.87	0.86	1.98	688.5	6.35	11.83	6.5	1	111.821	0	0	0	0
1	49	5	1	0	0	24.44	120	80	5.5	63	6.11029	393.4	3.77	1.34	1.13	2.02	247.43	7.56	11.72	6.9	1	132.516	0	0	0	0
1	49	5	0	0	0	25.39	153	93	6.3	67	24.76	455.3	3.65	2.15	0.95	2.06	591.01	6.97	15.5	6.3	1	123.012	0	0	0	0
1	49	7	0	0	1	25.48	150	80	5.24	77.6	10.9	495.3	5.19	2.12	0.86	3.47	855.197	12.68	20.74	9.1	1	102.998	0	1	0	1
1	49	8	0	1	0	27.1	123	82	5.2	101	2.83525	464.3	4.37	2.57	0.93	2.91	602.12	7.24	13.94	6.9	1	74.8941	1	0	0	0
1	50	0.1	0	0	0	25.96	138	87	5.6	103	1.62882	479.2	4.48	4	0.63	2.47	306.25	10.19	15.46	8.1	1	72.6275	1	0	0	1
1	50	0.1	0	1	0	26.67	118	90	5.6	53	23.5691	581.6	5.95	2.35	0.96	4.27	1150.3	17.54	24.72	20	1	117.271	1	0	0	0
1	50	0	1	0	0	29.41	149	94	4.34	64.4	3.94747	486.5	4.15	2.09	0.8	2.22	573.54	9.29	17.42	13.4	1	128.138	1	0	0	0
1	50	1	0	0	0	20.2	130	79	6.14	77	16.9681	411.7	5.24	2.47	0.79	2.88	471.978	4.87	8.04	6.4	1	103.241	0	0	0	0
1	50	10	1	0	0	26.31	133	66	4.51	82.6	22.66	441	5.63	2.1	0.98	3.43	590.845	3.41	10.81	6	1	94.8402	0	0	0	0
1	50	10	0	0	1	30.3	126	71	4.64	73.4	7.12	417.9	4.29	3.74	0.76	2.53	695.537	8.73	17.41	8.9	1	109.394	1	0	0	0
1	50	10	1	0	0	24.09	152	96	6.3	61.9	24.17	403.4	5.55	3.99	1.26	3.01	764.565	12.04	19.13	7.5	1	134.421	1	0	0	0
1	50	12	1	1	0	22.89	140	86	6.21	81.7	8.79	408.6	4.74	1.47	1.14	2.87	400.319	5.01	8.96	6.1	2	96.1048	0	0	0	0
1	50	14	0	0	0	25.18	127	78	4	74	17.9363	396.3	5.4	5.27	0.76	2.57	387.2	9.68	18.49	8.4	1	108.323	0	0	0	0
1	50	15	0	1	0	22.48	128	77	3.81	65.1	5.87	505.1	6.79	1.06	1.68	4.82	566.709	3.82	15.58	9.1	1	126.474	1	0	0	0
1	50	2	1	1	0	26.44	118	86	4.4	95.6	3.57	425.3	3.95	1.76	1.08	2.42	660.022	5.8	13.71	8.2	2	79.4782	0	0	0	0
1	50	3	0	0	1	31.16	128	80	4.96	98.6	12.86	422.1	5.13	3.76	0.76	3.53	649.775	6.22	15.49	6.1	2	76.5639	1	0	0	0
1	50	4	1	0	0	26.76	138	80	7.76	81.6	23.1892	396	5.54	2.1	1.11	3.86	487.895	9.6	21.62	7.7	1	96.2472	1	0	0	0
1	50	5	1	1	0	24.89	145	95	6.2	61	5.54509	394.2	4.17	1.67	0.93	2.63	292.46	8.16	15.04	7.4	1	110.687	1	0	0	0
1	50	6	1	1	0	24.77	138	95	3.9	48	22.66	461.8	5.18	17.67	0.78	1.25	289.12	7.68	13.51	7.1	1	122.145	1	0	0	0
1	50	7	1	1	1	25.15	135	70	4.59	81.4	14.16	485.5	5.5	10.58	0.61	1.7	241.502	13.09	20.67	8.1	1	96.5332	1	0	0	1
1	50	8	1	0	1	29.17	138	84	4.48	74.2	9.95	394.9	4.57	10.27	0.7	1.42	551.886	7.74	19.19	6.8	1	107.97	1	1	0	0
1	51	0.2	0	1	0	30.38	137	95	4.8	72	2.64843	405.1	5.71	1.89	1.29	3.42	378.78	11.04	22.4	8.5	1	111.187	1	0	0	0
1	51	0.5	1	1	0	22.48	130	89	7.3	67.3	4.73751	396.1	5.46	6.05	0.96	2.34	416.55	7.73	11.93	6	1	120.643	1	0	0	0
1	51	0	0	0	0	16	120	70	6.55	88.3	8.01	420.4	5.58	9.57	0.61	1.97	583.592	4.65	12.74	10.6	2	86.8769	1	0	0	0
1	51	0	0	0	0	21.48	119	65	5.45	80	28.2	403.7	5.16	1.68	1.22	3.68	732.174	5.93	13.57	7.4	1	97.8892	1	0	0	0
1	51	10	0	0	0	34.72	120	80	7.32	94	4.37	590.7	5.31	1.57	0.86	3.8	950.308	11.66	19.86	8.1	2	80.5488	0	0	0	0
1	51	20	1	0	0	25.11	141	80	5.42	89	1.73	390.8	3.59	1.72	1.01	2.26	830.784	10.61	20.61	10.4	2	86.0515	1	0	0	0
1	51	3	1	0	0	23.88	139	91	6.41	77.9	7.49	520.2	6.23	9.47	0.96	2.79	545.746	11.02	20.84	10.1	1	101.089	1	0	0	0
1	51	4	1	0	0	28.06	106	70	5.8	65	24.1761	429.6	5.51	2.75	0.91	3.56	523.06	12.42	23.28	11.2	1	125.823	0	0	0	0
1	51	5	1	1	0	22.21	126	78	3.92	102.2	15.61	534.3	4.67	1.81	1.05	3.04	667.307	6.7	9.74	5.9	2	72.8022	1	0	0	0
1	51	6	0	0	0	24.57	117	57	6.88	71.6	7.59	401.7	5.41	2.98	1.05	3.68	254.915	8.64	17.27	8.3	1	111.939	1	0	0	0
1	51	6	1	1	0	25.33	146	91	5.8	61.6	24.918	395.5	4.79	1.72	1.07	3.21	412.09	8.96	17.43	8.3	1	109.471	0	0	0	0
1	51	8	1	1	0	31.11	120	80	6.37	73.5	22.66	482.6	5.04	3.21	0.98	3.11	353.661	5.72	15.69	7.3	1	108.45	0	0	0	0
1	51	8	0	0	0	25.39	110	70	4.5	48	11.9215	473.5	4.88	2.16	0.95	3.12	587.01	8.83	18.99	10.3	1	121.29	1	0	0	0
1	51	9	1	1	0	23.63	130	80	9.2	78	8.63	440.3	3.98	4.25	0.69	2.21	471.51	9.34	11.76	7.5	1	100.932	1	0	0	0
1	52	0.5	0	0	1	25.39	142	78	2.44	75.6	5.14	413.1	5.95	1.13	1.09	4.78	445.942	10.66	21.16	12.1	1	104.085	0	0	0	0
1	52	0	1	1	0	21.05	110	70	5.91	120.6	22.66	406.2	6.23	2.49	0.99	4.44	1068.28	5.76	14.31	7.3	3	59.1795	0	0	1	0
1	52	1	1	1	0	17.78	119	90	6.3	51	23.6693	437.3	4.52	4.89	0.64	1.94	658.87	9.49	19.25	7.5	1	117.477	1	0	0	0
1	52	1	1	1	1	20.66	130	70	4.33	83.2	4.62	403.8	6.23	1.91	1.5	1.38	551.857	6.41	14.86	6.4	2	92.7024	1	0	0	0
1	52	10	1	1	0	23.73	163	66	6.17	81.8	6.82	426.5	4.33	5.45	1.1	1.3	393.133	5.26	12.62	6.9	1	94.624	1	0	0	0
1	52	11	1	0	1	26.84	121	73	4.9	77.4	22.66	419.2	4.96	2.86	0.96	3.29	223.786	8.55	17.66	7.6	2	101.165	1	0	0	0
1	52	15	1	0	0	28.62	110	70	6.7	85	22.66	390.7	3.15	1.73	1	1.27	331.34	10.68	16.57	8.7	1	90.3343	1	0	0	0
1	52	19	1	1	0	24	131	85	9.6	70.3	22.66	454.7	4.24	1.29	1.06	2.68	256.76	6.19	5.56	5.3	1	113.645	1	0	0	1
1	52	3	1	1	0	23.81	110	70	6	101	0.834547	512.2	5.11	1.56	1.28	2.88	259.92	5.07	6.56	6	1	73.3323	1	0	0	0
1	52	4	1	0	0	28.37	110	69	5.18	73.4	8.81	476.3	3.96	3.44	0.74	2.42	533.988	5.61	13.73	6.5	1	107.868	1	0	0	0
1	52	5	1	1	0	22.03	140	90	6.54	100.1	6.7	474.9	4.42	2.94	0.86	2.59	707.639	4.63	16.85	7.8	2	74.1302	1	0	0	0
1	52	5	0	0	0	25.48	146	106	7.26	100.8	9.73819	447.4	4.8	4.42	0.85	2.63	572.141	7.9	17.54	7.8	2	73.5083	1	0	0	0
1	52	5	0	0	0	25.61	115	89	6	76	22.66	446.4	3.72	3.18	0.76	1.77	276.09	11.32	16.5	8.9	1	103.423	1	0	0	0
1	52	8	0	0	0	24.77	138	83	5.2	68	8.69214	512.4	6.22	3.09	0.96	4.12	599.67	8.82	20.48	7.9	1	118.309	1	0	0	0
1	52	9	1	1	0	27.1	118	68	5.3	94	14.2537	416.3	3.72	3.52	0.72	2.15	433.06	7.31	17.63	6.4	1	79.985	1	0	0	0
1	53	0	0	1	0	28.55	135	80	7.5	83.6	3.64	677.9	5.51	2.75	1.11	3.59	671.216	6.19	23.71	12.1	1	91.5212	1	0	0	0
1	53	10	1	0	0	32.37	108	73	7.24	61.3	2.23	413	5.06	3.78	1.03	2.91	512.565	11.01	22.18	10.7	1	108.16	1	0	0	0
1	53	10	1	0	0	28.4	110	70	4.6	60	5.22	471.5	4.57	3.45	0.82	2.09	1122.46	14.44	25.86	12.9	1	109.118	0	0	0	0
1	53	10	1	1	0	22.48	140	90	5.15	82.9	3.52	551.2	5.39	4.83	1.04	2.67	497.154	4.51	10.79	6	1	92.4564	1	0	0	0
1	53	11	0	1	0	29.07	162	96	5.2	81	22.66	428.7	4.73	1.29	1.02	2.95	416.4	5.72	15.99	7.6	1	95.0848	0	1	0	0
1	53	15	0	1	0	20.43	130	80	5.84	70.4	12.8713	452.4	5.82	8.94	0.91	1.53	533.982	8.73	18.65	7.5	1	112.656	0	0	0	0
1	53	16	1	1	0	30	142	82	7	49.3	18.72	479.5	3.53	5.84	0.72	1.22	535.68	10.48	26.65	8.4	1	118.292	1	0	0	0
1	53	17	1	1	0	22.31	133	80	5.13	64.1	7.70625	440.6	5.73	1.95	0.86	4.09	541.289	6.15	13.85	7.5	1	126.176	0	0	0	0
1	53	2	1	0	0	23.05	102	68	6.36	77.5	2.72	507	5.06	1.78	1.03	3.7	497.036	4.18	12.36	6.5	1	100.301	0	0	0	0
1	53	2	1	0	0	20.9	126	79	5.4	88	5.93	458.7	4.57	5.69	0.84	2.11	289.9	7.13	17.51	8	1	86.0181	1	0	0	0
1	53	2	0	0	0	25.6	110	70	5.2	63	22.66	456	4.96	7.38	0.64	1.41	245.89	5.09	6.01	6.3	1	128.845	1	0	0	0
1	53	2	1	1	0	23.31	128	78	5.1	58	20.22	417.1	4.39	3.03	0.92	2.15	541.44	10.83	19.69	7.8	1	110.649	0	0	0	0
1	53	20	0	0	0	24.17	116	63	7.9	70	22.66	455.1	6.77	2.17	1	4.55	334.16	13.2	13.76	9	1	113.435	0	0	0	0
1	53	20	0	0	0	27.29	173	109	4.78	64.4	7.48	422.6	7.76	2.92	2.06	4.44	517.042	11.77	18.78	11.8	1	125.466	0	0	0	0
1	53	4	1	1	0	26.84	130	75	7.5	70.7	19.1573	451.8	5.6	4.18	0.9	3.07	644.17	11.67	19.16	9.6	1	112.078	1	0	0	0
1	53	6	0	0	0	27.34	178	120	7.4	133	20.5	568.2	7.11	3.87	1.09	4.09	274.41	7.55	11.04	7.1	3	52.2075	0	0	1	0
1	53	7	1	1	0	35.16	118	74	6.3	101.3	22.66	429.9	4.98	2.61	0.74	2.97	482.15	6.52	13.12	6.5	1	72.5584	1	0	0	0
1	54	0.2	0	1	0	26.04	135	92	6.2	79	14.1953	496.4	4.33	2.01	1.04	2.48	285.53	6.81	15.27	7.5	1	97.3167	0	0	0	0
1	54	13	0	1	0	21.64	143	94	6.2	90	22.66	438	3.99	1.28	1.55	1.66	381.24	8.3	18.97	7.4	1	83.1265	1	0	0	1
1	54	14	1	1	0	25.34	130	90	4.88	71.7	24.47	413.6	4.64	1.72	1.03	3.17	656.359	3.55	13.68	6.8	1	109.42	1	0	0	0
1	54	15	1	1	0	27.18	142	83	4.2	94	5.41	474.8	5.28	2.02	1.14	3.18	1075.78	6.7	11.8	7.2	1	78.8691	0	0	0	0
1	54	20	1	0	0	24.17	138	76	6.9	67	22.0468	443.7	5.97	2.1	1.21	4.18	446.21	13.74	14.93	8.2	1	118.767	0	0	0	0
1	54	3	0	1	0	30.86	131	83	4.2	55	25.0097	485.4	9.96	16.21	0.86	2.11	444.17	10.86	20.55	10.2	1	112.299	0	0	0	0
1	54	4	1	1	1	23.92	133	91	4.21	109.2	25.41	444.8	6	5.2	0.95	2.55	406.308	6.26	16.62	8.4	2	65.7972	1	0	0	0
1	54	4	0	0	0	24.97	110	70	6	70.6	22.636	536.7	3.9	4.51	0.69	1.51	577.5	6.77	12.1	8.8	1	111.484	1	0	0	0
1	54	5	1	1	0	22.5	116	63	7.5	96	5.38678	413.7	3.86	2.15	1.24	1.92	265.47	6.97	11.94	7	1	76.8869	0	0	0	0
1	54	5	1	1	1	31.64	119	80	5.62	69	6.47	417.2	4.4	2.23	0.86	2.66	629.996	8.06	18.49	7.4	1	114.617	0	0	0	1
1	54	7	1	1	0	23.34	180	70	4.7	73	14.1258	420.9	4.54	5.28	1.16	1.83	385.52	13.08	19.2	8.9	1	107.068	1	0	0	1
1	54	7	0	1	0	24.03	138	98	5.1	77	0.373007	430.5	6.72	2.01	1.08	4.62	844.87	10.48	25.01	9.1	1	100.381	1	0	0	0
1	55	0	0	0	0	32.27	123	80	5.7	70	4.76804	416.3	4.93	0.98	1.03	3.2	545.49	8.72	14.41	7.1	1	111.852	0	0	0	0
1	55	0	1	1	0	22.64	139	73	6.72	74.9	21.75	397.1	4.9	1.5	0.9	3.02	663.45	12.82	18.7	11.4	1	103.067	1	0	0	0
1	55	1	1	1	0	26.4	140	76	4.3	65	13.37	475.2	4.19	0.79	0.82	2.92	214.5	3.36	6.68	5.9	1	122.336	0	1	0	0
1	55	10	1	1	0	23.44	140	90	6.62	82.5	16.8851	629.4	7.06	4.68	1.93	3.13	761.032	5.63	11.89	6.5	1	91.7012	1	0	0	0
1	55	15	1	1	0	26.49	130	84	5.8	73	18.3599	446.6	4.73	2.1	0.92	2.64	985.53	6.81	18.91	7.5	1	106.319	0	0	0	0
1	55	2	0	0	0	22.86	136	90	5.6	105.7	22.66	445	4.76	2.04	0.81	2.96	1064.47	8	14.24	7.7	1	67.9612	1	0	0	0
1	55	2	0	1	0	25.15	171	96	6.2	94	5.23	400.9	3.87	1.28	0.59	2.76	466.52	6.24	12.21	5.5	1	78.317	0	0	0	0
1	55	3	0	1	0	28.71	110	80	7.39	77.4	24.9933	424.6	4.84	1.87	0.85	3.16	852.982	4.4	9.68	5.5	1	99.0558	0	0	0	0
1	55	7	0	1	0	24.65	147	93	7	83.7	22.66	508.3	5.25	6.24	0.64	2.25	516.54	17.92	26.44	12	1	90.1141	0	0	0	0
1	55	7	1	1	0	28.84	116	69	7.35	85.3	7.98	403.2	6.08	3.69	1.06	1.59	394.636	5.56	14.5	7	2	88.0745	0	0	0	1
1	55	8	0	0	0	25.59	133	78	5.83	65.5	7.18	692.9	3.61	3.57	0.67	1.92	337.661	6.61	16.77	11.8	1	121.208	1	0	0	0
1	55	9	0	1	0	19.72	135	85	4	78	8.39686	617.3	4.03	0.51	0.82	3.14	598.125	4.95	11.57	6	1	98.1353	0	1	0	0
1	56	1	1	1	0	23.8	104	69	8	89	22.66	490	5.22	1.91	1.11	3.67	515.5	14.01	25.64	13	1	83.0815	1	1	0	1
1	56	1	0	0	0	24.97	118	70	6.8	90.3	4.53	581.2	4.84	3.66	0.95	3.22	649.839	4.26	12.1	6	2	81.6377	1	0	0	0
1	56	1	1	1	0	22.27	136	80	6.07	89	4.83996	496.2	3.81	3.66	0.96	1.67	508.749	3.36	11.45	8.4	2	83.0815	1	0	0	0
1	56	10	0	1	0	33.87	120	80	6.6	90	16.5946	524.5	5.49	1.82	0.83	3.75	462.47	7.79	13.09	7.4	1	81.9668	0	0	0	0
1	56	15	1	0	1	34.6	125	60	4.93	71.1	3.33	400.4	4.35	7.15	0.74	1.8	648.23	6.6	14.83	7.1	1	108.995	0	0	0	0
1	56	2	0	1	1	21.87	122	90	5.8	107.8	14.04	608.9	4.84	4.67	0.87	2.4	542.495	8.21	20.07	9.5	2	65.8993	1	0	0	0
1	56	20	0	0	0	21.88	135	80	5.36	61.2	24.6	448.8	3.45	1.68	0.84	2.34	923.559	15.3	25.56	11.9	1	105.976	0	0	0	1
1	56	4	1	0	0	25.24	139	78	5.77	71.6	7.26	397.7	5.07	1.13	1.01	4.02	713.202	8.95	15.16	8.1	1	108.075	0	0	0	0
1	56	4	1	1	0	26.16	154	94	4.7	65	24.3828	436.5	2.55	1.24	0.78	1.46	487.82	6.18	12.58	6.2	1	121.48	1	0	0	0
1	56	5	0	1	0	20.83	140	89	4.95	58.9	22.66	413.1	7.2	5.83	1.19	3.37	350.237	10.64	18.78	10	1	107.658	1	0	0	0
1	56	7	0	0	0	22.31	126	80	5.6	69.9	21.5811	401.9	5.28	1.57	0.81	3.4	294.14	7.91	23.66	6.6	1	111.261	0	0	0	0
1	57	1	1	1	1	22.85	148	98	6.69	95.2	6.25	495.8	4.34	3.41	0.95	2.98	831.174	12.41	18.08	7.3	2	76.0491	1	0	0	1
1	57	10	0	1	0	22.67	120	76	8.8	78	22.66	498.4	4.92	2.45	1.1	3.08	584.891	15.42	24.29	10.8	1	96.7662	1	0	0	0
1	57	12	1	1	0	26.04	110	70	5.5	81	27.0102	510.3	4.87	2.69	1.64	1.72	1212.34	6.35	15.84	6.1	1	92.4502	1	0	0	1
1	57	14	1	1	0	26.67	168	91	5.6	85	7.42	422.2	4.31	2.1	0.87	2.56	600.94	10.17	19.93	8.2	1	87.2165	1	0	0	0
1	57	18	0	1	0	24.03	114	64	7.34	94.6	22.1669	502.9	3.98	2.92	1.08	2.02	550.96	9.42	14.96	7.4	1	76.6327	0	1	0	0
1	57	2	0	0	0	24.45	118	72	6.71	109.8	1.09485	522.6	4.82	1.03	1.4	3.16	708.053	4.28	13.17	6	2	63.9997	1	0	0	0
1	57	3	0	0	0	25.34	120	70	4.91	74.8	2.43	407.1	4.46	2.54	0.71	3.12	606.247	9.85	21.27	9.8	1	101.793	1	0	0	0
1	57	3	1	0	0	26.04	110	70	4	81	22.66	527.9	3.01	1.21	1.11	1.52	703.32	6.8	12.27	7.1	1	92.4502	0	0	0	0
1	57	3	1	1	0	22.89	98	63	11.55	49.69	6.11029	533.1	4.14	4.79	0.8	2.16	845.738	2.2	13.81	7.9	1	114.642	1	0	0	0
1	57	5	0	0	0	25.3	127	83	5.1	70.9	8.69568	403.8	5.07	7.9	0.98	1.35	356.11	8.37	16.68	8.9	1	108.601	0	0	0	0
1	57	5	0	1	0	29.02	135	80	6.26	96.8	18	426.3	5.79	2.01	1.06	4.25	361.372	3.12	5.25	5.2	2	74.532	0	0	0	0
1	57	5	0	0	0	22.66	135	80	4	51	13.8484	423.2	4.1	2	1.03	2.5	801.59	9.4	16.82	8.2	1	113.423	1	0	0	0
1	57	6	0	0	0	24.24	128	76	5.4	88.5	8.5	472	3.41	0.98	0.67	2.28	429.24	12.28	18.09	10.9	1	83.0638	0	0	0	0
1	57	6	0	1	0	24.34	134	75	5.52	61.8	19.47	410	4.91	7.53	0.8	2.55	679.528	8.05	19.96	7.2	1	104.813	1	0	0	0
1	57	7	1	1	0	25.91	131	81	5.7	92	17.94	547.1	4.36	2.1	0.86	2.65	466.38	7.7	14.29	6.6	1	79.2587	1	0	0	1
1	58	0.25	1	1	0	20.83	115	73	4.86	65.7	4.27	415.9	4.31	1.61	0.85	3.29	1015.92	9.05	20.53	8.1	1	118.244	0	0	0	0
1	58	0	0	0	0	22.77	102	69	4.9	71.9	22.66	405.6	4.33	2.48	0.88	2.55	824.54	16.94	24.89	12.4	1	106.03	1	0	0	0
1	58	1	0	1	0	26.35	125	75	5.94	117.6	55.26	420.4	5.22	3.98	0.99	3.27	616.514	4.82	15.75	7.6	3	58.4915	0	0	1	0
1	58	1	1	1	0	20.81	134	75	5.8	64	1.99975	483	5.07	1.07	1.03	3.51	261.86	7.76	15.7	7.8	1	122.052	1	0	0	0
1	58	10	1	1	1	24.03	138	80	6.86	82.1	8.7	418	4.17	1.36	0.89	2.53	540.038	7.26	14.37	7	1	90.3181	0	0	0	0
1	58	10	0	1	1	20.03	108	63	7.38	113.2	16.47	429.2	3.76	2.05	1	2.35	314.449	7.72	10.94	6.5	2	61.2513	0	0	0	0
1	58	10	0	0	0	28.04	117	72	4.4	60.7	28.7115	470.5	3.1	1.02	1.25	1.46	398.34	11.04	20.01	8	1	104.851	0	1	0	0
1	58	10	1	0	0	21.67	119	71	8.1	68	27.8361	404.4	3.13	1.1	0.83	1.8	551.1	4.2	5.27	5.1	1	113.426	0	0	0	1
1	58	10	1	0	0	22.04	106	55	11.46	193.1	62.08	619.5	4.1	1.16	0.63	3.01	701.356	6.24	16.95	7.1	3	32.1148	0	0	1	0
1	58	10	0	0	0	23.88	191	130	17	299	74.9416	522.5	6.52	4.03	0.88	3.27	422.23	8.38	18.99	8.5	4	18.9291	0	1	1	0
1	58	13	0	0	0	21.83	120	80	4.81	73.1	4.64	444.3	6.73	1.92	1	4.52	506.151	4.04	9.93	6.3	1	103.93	0	0	0	0
1	58	16	0	0	0	30.12	126	73	8.23	116.1	72.5	395.9	6.01	1.87	1.09	3.67	811.265	14.51	31.23	13.9	3	59.4064	0	0	1	1
1	58	2	0	0	0	26.09	113	75	6.2	101	4.69	529.6	3.89	1.67	0.76	2.3	461.32	6.47	10.07	6.9	1	70.3058	0	0	0	0
1	58	20	0	0	0	26.67	113	72	6.9	67.9	22.66	501.9	3.87	1.73	0.66	2.34	116.74	16.96	23.95	10.6	1	113.628	0	0	0	0
1	58	3	1	1	0	30.76	119	72	4.05	100.7	22.66	420.3	3.68	2.24	0.96	2.16	553.659	5.13	11.36	7.1	2	70.5591	0	0	0	0
1	58	5	0	0	0	27.24	131	85	6.2	79	22.66	392.1	4.75	1.07	1.19	2.81	487.19	6.65	14.43	6.6	1	94.6203	0	0	0	0
1	58	6	0	1	0	22.04	130	70	4.5	54.7	3.24	390.7	5.6	2.02	1.09	3.28	960.03	15.61	26.48	11.5	1	109.433	1	1	0	0
1	59	0.1	0	0	0	22.38	140	80	4.7	88	0.177662	446.8	5.68	2.99	1.15	2.03	748.38	7.07	14.36	7.1	1	82.468	1	0	0	0
1	59	1	0	0	0	25.39	180	96	5.8	49.1	14.51	396.5	5.96	1.3	1.44	3.82	610.841	9.26	17.34	7.9	1	113.599	0	0	0	1
1	59	1	0	0	0	23.24	104	66	3.46	85.6	9.85	397.4	3.25	2.27	1.05	1.76	297.282	5	11.36	6.2	2	85.2715	0	0	0	1
1	59	1	0	1	0	30.86	129	79	8.3	74	22.66	480.7	4.83	1.54	1.12	3.08	510.16	7.62	14.06	6.3	1	101.687	0	0	0	0
1	59	10	1	1	0	18.43	116	68	7.9	84	22.66	472.2	5.8	11.44	0.72	1.35	778.46	12.32	20.6	8.7	1	87.2391	1	0	0	0
1	59	10	1	1	0	21.09	130	85	7.03	75	18.08	458.1	5.53	5.52	1.31	2.97	210.149	6.83	12.73	6.8	1	100.05	0	0	0	0
1	59	11	0	1	0	23.34	122	74	7.4	122	11.3064	478.7	3.46	1.09	0.94	1.84	369.48	9.17	15.88	8.4	3	55.5592	0	0	1	0
1	59	15	0	0	0	20.55	145	76	5.71	85.3	26.866	473.8	4.23	4.66	0.84	2.4	465.167	10.31	25.12	9.5	2	85.6342	1	0	0	1
1	59	20	0	0	0	26.4	110	70	4.1	64	6.75148	462.3	3.21	1.45	0.83	1.8	615.21	9.15	16.46	6.7	1	121.197	1	0	0	0
1	59	8	1	0	0	25.54	125	84	6.2	72.2	22.66	451.1	5.07	10.59	0.64	0.98	626.97	11.29	20.98	9.3	1	104.759	0	0	0	0
1	60	0	0	0	1	23.73	113	69	6.6	86	4.26	451.3	3.87	3.71	0.74	1.9	754.657	12.47	26.77	10.7	2	84.1987	1	0	0	0
1	60	10	1	1	0	25.63	132	74	8.36	133.1	29.2	443.6	7.16	1.14	0.96	5.92	471.196	7.92	8.76	9.6	3	49.6573	0	1	1	0
1	60	10	1	1	0	27.18	110	70	4.3	97	27.2287	426	3.56	0.82	0.85	2.13	351.71	5.69	12.9	6.5	1	72.7959	0	0	0	1
1	60	10	1	1	1	30.08	140	90	4.34	56.4	22.66	457.4	4.22	2.15	1.06	2.26	522.077	10.86	17.71	8.7	1	106.557	1	1	0	0
1	60	13	1	1	0	26.75	154	65	5.78	77.8	29.83	519.7	5.1	1.71	1.08	3.79	604.503	4.68	11.84	6	1	95.0429	0	0	0	0
1	60	14	1	1	0	22.86	153	84	5.03	104.8	12.53	448	5.8	2.93	0.94	3.94	596.929	10.74	25.65	11.5	2	66.2975	0	0	0	1
1	60	17	0	0	0	23.44	142	60	7.43	98.8	23.69	427.3	5.7	1.48	1.19	4.3	333.739	6.37	20.62	8.8	2	71.1956	0	0	0	0
1	60	2	0	0	0	29.3	167	89	6.31	174.4	131.31	422.9	4.27	8.04	0.93	1.47	422.595	8.35	17.52	7.5	3	35.8166	1	1	1	0
1	60	2	0	0	0	23.44	114	79	5.77	99	3.33	621.6	5.07	2.39	0.95	3.51	494.885	8.28	13.59	9.9	2	71.0217	0	0	0	0
1	60	3	0	0	0	26.99	125	80	4.7	71.9	6.57	391.2	5.11	0.89	1.18	2.69	290.882	5.45	10.92	7	1	104.551	0	0	0	0
1	60	3	1	1	0	22.59	131	72	6.06	87.1	12.58	562.4	4.01	5.23	0.86	1.45	543.562	5.1	15.14	6.7	2	82.9148	0	0	0	0
1	60	5	0	0	0	28.84	110	68	7.8	96.1	18.1997	432.4	4.39	2.06	0.88	2.77	435.87	5.4	9.08	6	2	73.621	1	0	0	0
1	60	8	0	1	1	25.71	135	78	7.81	80.5	8.2758	473	3.03	2.65	1.04	1.27	442.691	5.76	14.49	5.1	1	91.2025	1	0	0	1
1	61	0	1	1	0	23.42	118	85	3.5	59	14.5762	410	3.44	1.48	1.23	2.28	493.849	12.55	22.69	11.1	1	103.87	1	0	0	0
1	61	1	0	0	0	24.98	160	90	3.89	69.1	8.82	423.8	5.68	0.94	0.99	4.53	421.187	7.14	17.44	10.6	1	108.927	1	0	0	0
1	61	10	0	0	0	26.35	162	98	5.1	83	21.75	464.9	4.43	2.7	0.66	2.62	604.96	8.05	17.22	8.7	1	87.2766	0	0	0	0
1	61	10	0	1	0	33.3	135	83	5.8	79	10.1016	544.2	4.52	1.53	1.1	2.67	428.1	7.03	13.65	6.6	1	92.6472	0	0	0	0
1	61	10	0	1	1	20.31	136	85	5.52	74.3	3.03086	433.1	3.6	1.59	1.4	1.91	349.259	6.97	13.51	4.4	1	99.7787	0	0	0	1
1	61	2	1	0	0	23.66	160	90	6	82.3	7.29	422.5	4.71	3.35	0.81	2	599.175	4.27	8.34	8	2	88.1749	1	0	0	0
1	61	20	1	1	1	22.66	111	62	7.14	87.9	28.11	409.2	4.07	2.2	1.02	2.73	467.725	15.49	22.8	7.5	2	81.4293	0	0	0	1
1	61	3	1	1	0	21.09	100	70	5.4	86.6	2.53	448.9	4.15	2.4	0.96	2.65	414.17	6.27	13.35	6.8	1	82.9095	0	0	0	0
1	61	3	1	0	1	24.33	130	80	5.95	83.9	3.12	466.4	4.79	1.92	0.95	2.86	459.819	5.61	15.59	7.4	2	86.146	1	0	0	0
1	61	5	1	1	0	25.78	114	68	6.6	66	22.66	430.5	4.25	1.14	0.94	2.52	355.92	6.81	8.75	5.9	1	115.142	1	0	0	0
1	61	8	1	1	1	29.72	161	89	8.09	106.8	16.88	471	4.93	2.01	0.99	2.99	560.53	9.86	18.07	8.3	2	64.3459	0	0	0	1
1	61	9	1	1	0	27.64	140	85	5.57	88.1	2.74	528.8	5.01	1.03	1.36	3.57	671.761	3.66	16.66	5.7	2	81.2059	1	0	0	0
1	61	9	0	0	0	22.66	129	81	6.05	106	12.48	477	5	1.99	0.76	3.33	481.384	9.58	19.81	10.5	2	64.9334	1	0	0	0
1	62	1	1	1	0	28.44	147	91	5.6	66	22.66	439.7	6.14	0.95	0.69	4.68	247.28	5.05	11.38	6.9	1	114.336	0	0	0	0
1	62	13	1	0	0	19.95	145	75	11.46	261.7	108.44	439.6	7.62	9.42	0.95	2.27	412.865	10.2	15.24	11.3	4	21.6216	0	0	1	0
1	62	20	0	0	0	32.67	110	70	4.9	76	5.28	463	5.63	8.28	0.78	1.79	660.59	17.1	29.05	11.9	1	96.4071	1	0	0	1
1	62	4	1	1	0	25.48	130	71	4.8	89.6	11.47	463.2	3.22	3.19	0.82	1.7	539.17	5.39	10.73	7.4	1	79.0082	1	0	0	0
1	62	6	1	0	1	25.71	140	79	7.94	59.4	11	403.9	5.42	2.56	0.93	3.4	585.571	6.24	17.81	7.3	1	102.857	0	0	0	0
1	62	8	1	1	0	26.7	128	95	6.2	120.1	21.78	486.5	4.69	1.51	0.78	3.41	489.995	6.46	13.21	6.7	3	55.4428	1	0	1	0
1	62	8	0	1	0	19.26	125	71	6.36	73.8	5.81	473.2	3.73	1.77	0.92	2.14	593.172	5.93	14.95	7.2	1	99.8924	1	0	0	0
1	62	9	0	0	0	23.83	121	63	5.42	98.8	12.36	390.9	4.74	1.36	1.1	3.54	656.106	4.35	14.89	7.7	2	70.2023	1	0	0	0
1	63	0.5	1	1	0	28.52	110	70	5.1	66	3.87698	406.2	5.09	1.35	1.43	3.07	772.83	4.43	7.11	6.8	1	113.536	0	0	0	0
1	63	10	1	0	0	25.78	121	75	11.3	122.2	19.3906	573.6	5.65	3.54	0.84	3.29	630.56	18.62	30.82	13.2	3	53.9129	0	0	1	0
1	63	10	1	1	0	20.94	121	77	5.3	61	16.9935	443	5.12	1.12	1.24	3.35	796.48	13.63	22.87	10	1	101.027	1	0	0	1
1	63	10	0	0	0	26.04	170	100	9.81	121.9	38.4721	403.5	6.34	1.95	0.79	3.28	527.309	5.52	18.53	7.6	3	54.0733	0	0	1	0
1	63	10	1	1	0	21.88	116	74	6.3	89	3.1111	458.1	4.2	2.24	0.79	2.56	316.59	7	11.8	7.3	1	79.095	0	0	0	0
1	63	13	0	0	0	23.83	187	82	5.22	56.7	3.14	406.3	4.44	1.18	0.73	3.14	610.623	10.75	16.47	9.5	1	104.108	0	0	0	0
1	63	15	1	1	0	24.98	175	98	7.98	117.5	10.32	497.1	5.31	4.86	1.03	2.4	543.021	10.89	18.53	10.9	3	56.5309	0	0	1	0
1	63	15	0	1	0	21.72	110	70	5.1	80.1	5.72	416.2	4.89	2.3	1.05	2.82	425.65	8.51	16.78	8	1	89.8401	0	0	0	0
1	63	4	1	1	0	27.06	130	90	7.51	122.5	55.26	450.9	3.3	2.24	0.73	2.04	517.825	5.53	10.21	6.8	3	53.7533	0	0	1	1
1	63	5	0	0	0	22.14	113	66	7.19	68.9	5.95	484	4.35	3.79	0.67	2.78	347.045	9.54	20.77	8.1	1	107.784	0	0	0	1
1	63	6	0	0	0	23.53	129	82	4.69	103.6	1.91	480.4	4.5	1.82	0.83	2.92	701.06	3.65	11.72	6.6	2	65.8251	1	0	0	0
1	64	0.1	0	0	0	22.19	131	90	3.7	72	8.22	489.4	6.84	1.81	0.99	5.33	939.58	7.16	16.77	10.2	1	101.484	1	0	0	0
1	64	0.1	1	1	0	30.8	130	85	6.67	108.1	7.71843	531.7	5.19	1.93	0.92	3.66	550.475	5.96	16.78	7.8	2	62.0892	0	0	0	0
1	64	0.5	0	0	0	22.27	124	81	5.6	72	3.26	423.6	5.24	2.44	0.7	3.46	1214.68	19.74	29.6	12.9	1	101.484	0	0	0	0
1	64	0	1	1	0	29.24	142	88	4.5	88	22.66	542	7.45	3.78	1.05	4.77	725.96	7.31	14.75	7.4	1	79.6217	1	0	0	0
1	64	1	0	1	0	22.89	173	79	3.9	75	16.763	474.2	4.75	2.47	0.93	2.71	408.45	6.88	14.13	6.3	1	96.5966	1	0	0	1
1	64	10	1	0	0	23.66	126	76	5.3	64.3	3.25	392.1	3.34	0.99	0.7	2.34	591.198	4	11.71	6.5	1	116.355	0	0	0	1
1	64	10	0	0	0	25.24	114	73	9.2	81	6.06019	404.5	5.08	1.87	1.12	2.85	914.11	18	25.86	13.5	1	88.0142	0	0	0	0
1	64	12	0	0	1	23.03	155	82	10.86	185.3	41.818	493.5	5.47	1.59	1.09	4.07	515.794	7.22	16.04	7	3	32.3631	0	0	1	0
1	64	14	0	0	0	29.27	140	76	5.8	72	17.9535	411.3	2.91	0.68	0.84	1.94	416.79	7.7	15.92	7.6	1	101.484	1	0	0	1
1	64	15	0	0	0	27.1	141	90	7.4	87.6	11.6234	488.8	4.92	1.72	0.86	2.65	217.68	4.99	14.06	7.2	1	80.0615	0	0	0	1
1	64	19	0	0	0	21.3	106	55	10.77	122	10.5	545	2.1	0.7	0.65	1.08	273.327	7.5	25.49	7.7	3	53.6416	0	0	1	1
1	64	2	1	0	0	22.89	136	72	5.13	81.7	19.8088	398.1	4.14	1.13	0.93	2.78	569.877	4.28	6.69	6.6	1	87.1033	1	0	0	0
1	64	4	0	0	0	25.64	138	87	4.8	65	3.08	390.7	3.85	1.47	0.81	2.24	241.39	7.7	14.22	8.1	1	114.841	0	0	0	0
1	64	5	1	1	0	28.83	134	70	3.88	82.4	24.9933	488	4.32	1.18	0.76	3.19	429.952	3.45	10.14	6.1	2	86.2095	0	0	0	0
1	64	6	1	1	0	34.48	108	66	5.6	70	9.77497	466.1	3.16	1.42	0.8	2	589.26	6.01	11.38	6.7	1	105	0	0	0	0
1	64	8	1	1	0	27.25	165	93	7.4	135.1	73.33	417.8	3.95	1.52	0.87	2.79	827.553	10.43	19.51	8.6	3	47.4186	0	0	1	0
1	64	8	0	0	0	19.91	200	107	6.6	81.1	25	442.8	4.44	2.36	1.62	2.55	501.059	5.85	12.88	5.7	2	87.883	1	0	0	1
1	65	1	0	0	0	28.96	156	92	5	89	22.66	587.8	5.65	1.97	0.9	3.63	456.15	5.89	7.89	6.1	1	77.9916	0	0	0	0
1	65	10	0	0	0	30.36	153	76	5.27	85.7	14.62	413.8	4.46	2.2	0.84	3.01	562.885	6.91	18.57	6.7	1	81.6369	1	0	0	0
1	65	10	0	1	0	20.4	137	61	5.7	81.5	20.5248	453.2	3.5	1.09	0.8	2.13	614.586	7.48	16.55	6.9	2	86.7502	1	0	0	0
1	65	12	0	1	0	23.83	105	64	6.3	80	3.47	391.8	2.84	0.86	0.7	1.49	510.79	10.53	23.53	8.6	1	88.7206	0	1	0	0
1	65	6	1	0	0	24.34	118	70	7.78	69.7	25.715	425	4.22	1.69	0.67	2.79	275.81	8.19	16.9	13.2	1	104.807	0	0	0	0
1	65	6	1	0	0	26.17	147	83	3.78	81.5	5.2	412.6	3.4	1.37	0.93	1.96	417.404	5.93	14.87	8.1	1	86.7502	1	0	0	0
1	65	8	0	1	0	29.59	144	84	6.7	91.1	29.4369	406.9	3.95	1.2	0.85	2.48	362.86	7.1	13.56	6	1	75.8233	0	0	0	0
1	65	9	1	1	0	24.34	157	76	5.5	69	12.58	409.6	4	1.94	0.67	2.29	504.74	8.19	17.49	8.1	1	106.094	1	0	0	1
1	66	10	0	0	0	25.71	142	77	7.6	141	11.2089	488.7	3.44	2.6	0.73	1.41	107.16	3.6	8.58	7.2	2	44.4021	0	1	1	0
1	66	15	0	0	1	26.04	167	75	7.83	136.3	76.66	462.5	5.8	2.37	1.18	4.01	468.954	9.15	16.22	8.3	3	46.2598	0	1	1	0
1	66	6	0	0	0	22.07	109	66	4.3	78.7	27.4556	424.7	6.03	1.72	0.79	4.37	441.6	11.8	21.23	9.3	1	89.862	0	0	0	0
1	66	8	0	0	0	22.64	120	70	5.3	69.5	9.35364	390.8	5.8	2.64	0.84	3.45	913.2	15.98	24.5	11.5	1	104.436	0	0	0	1
1	67	0.4	1	0	0	24.67	133	70	7.71	83.6	23.43	418.1	4.94	5.21	0.74	3.08	744.623	10.38	22.1	11	2	82.949	1	0	0	0
1	67	0	1	0	1	23.63	108	62	7.19	106	3.08	431.9	3.16	1.22	1.11	1.85	627.199	6.62	17.76	7.7	2	62.2535	1	0	0	0
1	67	10	1	0	0	30.82	164	77	7.44	106	5.62	396.7	4.01	1.98	0.8	2.78	649.464	8.49	18.36	9.5	2	62.2535	0	0	0	0
1	67	21	1	1	0	23.73	137	73	5.2	90.9	11.5684	420.9	6.18	12.92	0.81	1.62	639.478	6.8	16.93	6.6	2	74.9644	1	1	0	1
1	67	8	0	0	0	27.64	128	84	6.38	101.8	3.67	478.5	4.62	1.1	0.87	3.44	512.116	5.25	16.14	6.4	2	65.372	0	0	0	0
1	67	8	0	0	0	25.08	110	70	4.5	64	8.89	408.5	2.41	0.98	0.94	1.2	437.56	6.28	12.72	6.8	1	114.574	0	0	0	0
1	68	0.25	0	0	0	25.81	185	82	3.45	84.4	18.66	406	4.65	3.55	0.84	2.81	440.854	6.59	13.71	8.6	2	81.4254	1	0	0	0
1	68	15	0	0	0	21.79	113	70	4.27	85.3	21.08	444.9	4.55	1.54	0.98	2.42	405.533	3.92	12.8	6.2	2	80.3879	0	0	0	0
1	68	16	0	0	1	26.44	135	80	4.98	105.6	28.0512	501.2	3.38	2.08	0.84	2.33	660.662	7.25	14.62	7.8	2	62.101	1	0	0	0
1	68	2	0	0	0	24.44	144	86	5	84	3.57	519.9	3.33	1.35	0.84	1.83	302.72	10.81	20.5	9.3	1	81.8944	1	0	0	0
1	68	2	0	0	0	19.69	115	82	11.3	166.8	119.1	482.6	3.33	3.87	0.61	1.36	646.606	4.54	13.7	14.2	3	35.7333	0	0	1	0
1	68	21	0	0	0	20.58	138	90	8.4	89.6	4.9	418.7	3.17	1.9	0.92	2.05	624.482	7.42	12.94	6	2	75.7474	0	0	0	0
1	69	0.5	0	0	0	23.71	131	65	5.46	108.4	5.12	533.6	3.6	1.1	0.69	2.57	500.24	5.25	13.83	6.4	3	59.7457	0	0	1	0
1	69	14	0	0	0	22.6	137	77	7.45	83.8	4.16	492.1	3.69	1.78	0.94	2.37	327.487	6.52	12.57	6.7	2	81.5559	1	0	0	0
1	69	16	0	0	0	25.64	127	63	6.21	120.3	29.63	405.5	4.43	0.96	1.4	2.88	662.608	5.79	12.98	6.6	3	52.6764	0	0	1	0
1	69	30	0	1	0	27.89	111	63	5.4	92	11.4385	423.6	4.23	1.33	0.76	2.8	680.65	9.19	21.49	8.2	1	72.8514	0	0	0	0
1	69	4	1	1	0	23.83	119	70	6.1	66.7	22.66	397.3	4.57	2.35	0.9	2.63	348.31	14.53	23.07	12.7	1	107.47	0	0	0	0
1	69	8	0	0	0	25.1	159	83	6.08	121	20.5	475.4	4.59	2.11	0.56	3.3	518.487	4.24	14.25	7.4	3	52.3082	0	0	1	0
1	70	0.2	1	0	0	25.33	140	80	6.17	113.9	13.03	456.6	4.26	1.79	0.82	2.55	591.939	11.66	25.85	13.7	3	55.8817	1	0	1	0
1	70	0	1	0	0	22.41	113	85	4.2	66	1.52956	414.7	2.72	1.02	0.75	1.48	379.14	6.64	9.17	5.4	1	108.088	0	0	0	0
1	70	11	1	1	0	23.31	128	65	6.13	78.2	4.13	396.8	6.28	5.39	0.85	2.75	552.442	6.37	12.93	7.4	1	88.048	0	0	0	1
1	70	13	0	1	0	25.33	134	75	11.5	91	7.16787	589.6	2.67	1.35	0.61	1.62	281.47	7.76	19.26	7.7	1	73.3036	0	0	0	0
1	70	19	0	0	0	34.85	124	72	8.9	125.5	26.2171	445.2	3.78	0.95	1.36	1.71	572.877	8.33	19.35	7.5	3	49.6988	0	0	1	1
1	70	21	0	0	0	23.24	145	85	10.3	115.4	38.12	418.4	3.48	1.66	0.6	2.5	211.419	14.43	21.88	9.8	3	55.0047	0	0	1	0
1	70	3	1	0	0	32.46	136	72	5.82	99.6	8.19908	428.8	4.65	1.79	0.97	3.01	388.615	4.29	13.08	6.3	2	65.722	0	0	0	0
1	70	3	0	0	0	24.67	130	80	5.6	69	27.8395	407.9	3.91	1.25	0.98	2.2	266.46	6.49	11.54	7.1	1	102.433	0	0	0	1
1	70	8	0	1	0	20.2	130	78	3.7	70.7	7.94	421.7	3.76	0.8	1.06	2.25	641.19	5.01	16.39	6.8	1	99.4623	0	0	0	0
1	71	10	0	0	0	24.65	136	85	8.84	128.8	101.67	429.1	5.66	1.97	1.1	4.21	797.185	11.32	21.23	9.9	3	47.8264	1	0	1	0
1	71	12	0	0	0	19.43	156	79	5.74	122.4	63.5629	403.4	4.9	1.37	1.1	3.28	578.824	5.31	16.36	8.3	3	50.866	0	0	1	0
1	71	5	0	0	0	25.1	112	59	7.1	90.8	4.51	413.9	2.59	1.35	1.19	1.44	170.851	5.58	15.7	8.4	2	72.9844	1	0	0	0
1	71	7	0	0	0	23.11	163	112	7.5	96	3.23	441.1	5.24	1.08	1.07	3.66	659.71	7.16	16.88	6.9	1	68.2323	0	0	0	0
1	71	7	0	0	0	20.06	130	75	5.08	93.7	21.75	399	3.77	1.16	0.72	2.41	672.524	3.39	13.8	6.6	2	70.2623	0	0	0	0
1	71	7	0	0	0	23.73	160	110	5.66	90.3	25.4232	435.8	4.31	1.33	1	3.07	106.803	3.54	11.61	6.3	2	73.4732	0	1	0	1
1	72	20	0	0	0	26.84	120	61	7.7	129	15.0061	431	6.08	1.89	1.04	4.13	107.25	14.46	24.17	8.9	3	47.4026	1	0	1	1
1	72	20	0	0	0	28.04	138	66	4.9	71	22.66	478.8	5.22	2.25	1.17	2.99	502.24	7.62	17.79	7.5	1	97.5739	1	0	0	0
1	72	3	0	0	0	20.96	145	76	5.35	100.8	22.66	401.8	4.65	1.49	0.9	3.2	263.885	9.41	21.24	11.3	2	63.8736	0	0	0	0
1	72	4	1	0	0	18.03	151	61	7.5	80	25.1636	408.5	4.75	2.4	0.82	3.11	232.69	8.5	16.43	7.3	1	84.4635	0	0	0	0
1	73	0	0	0	0	26.71	117	62	9.4	97	22.7176	504.3	5.85	3.61	0.94	3.17	671.49	19.75	27.7	13.5	1	66.4427	0	0	0	0
1	73	20	0	0	0	24.97	156	71	17.77	450.7	61.67	585.5	4.24	2.73	0.7	2.41	490.163	10.37	14.86	8.6	5	10.373	0	1	1	0
1	74	4	0	0	0	25.89	115	61	4.86	78.4	15.0061	428.1	3.03	1.67	0.83	1.57	607.542	4.07	15.55	7.3	2	85.3445	0	0	0	0
1	74	5	0	0	0	22.1	145	95	5	91	22.66	411.9	3.97	1.4	0.76	2.59	366.81	7.43	11.39	7.1	1	71.2726	1	0	0	0
1	75	13	0	0	0	27.34	146	92	10.9	121.1	50.83	452.3	2.59	2.67	0.38	1.48	399.873	14.59	30.89	13.6	3	50.0993	0	0	1	0
1	75	14	0	0	0	26.84	130	70	8.57	84.3	8.5	405.9	5.45	1.37	1.24	3.75	488.625	6.51	20.08	7.8	1	77.6296	0	0	0	0
1	75	15	1	1	0	20.83	117	73	5.9	49	9.54	456	3.76	1.35	0.96	2.22	551.62	7.68	18.03	6.5	1	101.608	0	0	0	0
1	75	16	0	0	0	24.44	122	56	6.29	79.3	3.88	406.4	3.83	1.59	0.82	2.6	461.891	7.74	19.11	8.3	1	83.5856	0	0	0	0
1	75	3	1	1	0	24.46	138	87	3.3	56	20.3	436.9	3.82	2.59	0.78	2.04	544.86	12.37	20.14	10.8	1	96.1818	1	0	0	1
1	75	8	0	0	0	27.18	140	84	5.26	70.8	2.62	401.3	5.01	2.17	0.92	3.26	455.518	8.93	19.1	8.6	1	95.8655	1	0	0	0
1	76	3	0	0	0	24.52	105	75	6.2	67.4	5	422.3	4.34	1.51	0.92	2.83	542.6	12.7	28.92	9.7	1	101.03	0	0	0	0
1	77	15	0	0	0	30.04	150	68	10.08	98.5	4.88	567.9	4.01	1.38	1.12	2.54	678.189	5.98	20.24	8.8	2	63.4142	1	0	0	0
1	77	20	0	0	0	22.64	120	60	4.9	76.2	7.8	484.8	3	0.88	1.14	1.49	422.11	7.74	22.74	7.7	1	86.4904	0	0	0	0
1	77	3	0	0	0	25.91	132	61	5.84	107.5	25.5198	468	4.86	0.9	1.17	3.35	585.69	5.49	9.76	6.9	3	57.053	0	1	1	0
1	78	10	0	0	0	25.4	156	81	5.94	95	5.72299	412.8	5.9	1.66	1.18	4.41	516.965	8.53	22.41	7.1	2	65.7859	1	0	0	1
1	78	10	0	0	0	29.55	110	70	5	73.5	22.66	411.7	4.85	1.48	1.1	2.9	358.34	9.38	21.39	9.5	1	89.7138	1	0	0	0
1	78	2	0	0	0	24.88	135	60	9.3	104	3.81	463.4	2.82	0.96	0.7	1.65	383.28	6.19	12.84	5.8	3	58.9667	0	0	1	1
1	78	20	0	0	0	22.67	119	84	6.89	97.7	10.1016	517.4	4.07	1.09	0.87	3.16	613.254	6.01	17.96	7.3	2	63.5943	0	0	0	1
1	79	20	1	0	0	26.48	144	70	6.48	88.2	22.66	391	4.52	0.73	1.6	2.55	717.136	3.78	15.92	5.7	2	71.4625	0	0	0	0
1	80	2.5	0	0	0	28.89	154	72	6.6	87.1	10.1997	419.6	4.5	0.69	1.34	2.73	752.83	5.52	9.17	6.3	1	72.0472	0	0	0	0
1	80	7	0	0	0	20.51	118	66	6.9	73.5	10.9325	410	4.59	3.69	0.77	2.59	255.645	3.36	10.3	7.2	1	88.4622	0	0	0	0
1	81	18	0	0	0	23.73	160	75	10.7	89	16.3048	679.8	4.23	3.98	0.68	1.7	416.34	8.57	22.19	7.9	1	69.7005	1	0	0	0
1	81	22	0	0	0	30.8	132	76	8.8	101	14.687	482.2	4.05	1.21	0.76	2.56	448.06	13.81	26.89	12	3	59.8169	1	0	1	0
1	82	1	0	0	0	21.93	158	80	9.8	174.5	4.58	436.6	6.73	1.26	1.14	5.23	571.901	6.2	14.83	6.9	3	30.6667	0	0	1	1
1	82	10	1	1	0	24.61	140	54	6.9	76.9	9.51	403	2.67	1.42	0.97	1.54	303.469	5.69	14.81	6.4	1	82.5872	0	0	0	0
1	82	20	0	0	0	27.39	138	60	8.2	112	25.1755	466.8	3.92	0.84	0.87	2.4	562.46	5.03	11.52	6.1	3	52.4195	0	0	1	0
1	83	20	1	0	1	25.22	173	63	15.63	158.5	32.16	600.5	3.66	1.38	0.76	2.34	347.866	6.49	17.31	7.1	3	34.2067	0	1	1	0
1	83	8	0	0	0	23.73	148	63	12	161	19.9432	492.7	3.72	1.24	1.11	1.74	84.25	14.31	25.68	9.4	3	33.5656	0	0	1	0
1	89	0.5	0	0	0	23.92	120	60	8.6	92	6.47	447.9	5.08	1.04	1	3.18	298.02	6.72	17.55	6.5	1	63.3028	0	0	0	0
1	47	3	1	1	0	21.91	130	92	6.3	66	8.14081	648	4.59	1.14	0.95	3.04	511.03	5.77	10.46	6.5	1	127.041	1	0	0	0
1	56	2	0	0	0	21.36	130	87	4.6	68	4.18	476.8	3.16	2.73	0.94	1.22	1024.07	9.98	17.82	7.7	1	115.031	0	0	0	1
1	70	20	0	1	0	25.21	120	80	11.79	148.5	5.3	460.5	4.14	0.96	0.96	2.24	290.582	7.65	15.53	9	3	40.5498	0	0	1	0
1	71	0	1	1	0	26.71	134	72	4.8	66	7.17762	472.2	4.69	1.89	1.31	2.81	401.43	8.13	18.44	8	1	107.331	0	0	0	0
1	77	4	0	0	0	37.7	166	99	6.5	121	19.7935	455.2	4.24	0.92	0.86	2.84	488.15	9.75	23.2	9.3	3	49.4497	0	0	1	0
1	73	14	0	0	0	20.03	148	80	6.44	73	0.319734	462	3.54	1.28	0.87	2.46	408.578	7.03	15.11	10.4	1	93.6908	0	0	0	0
1	73	14	0	0	0	23.78	148	80	6.44	73	22.66	462	3.54	1.28	0.87	2.46	698.663	7.03	15.11	10.4	1	93.6908	0	0	0	0
2	21	0.1	0	0	0	22.48	110	60	3.4	47	3.82	142.8	5.34	0.72	1.85	2.87	488.6	8.27	18.33	12.7	1	136.018	0	0	0	0
2	28	3	0	0	0	29.03	122	65	4.18	30.1	23.8658	170.5	4.11	11.69	0.65	1.25	593.537	12.73	20.68	10.3	1	149.938	1	0	0	0
2	30	5	0	0	1	26.64	118	80	4.19	58	7.65	158.9	5.12	1.31	1	3.73	670.28	7.81	19.79	7.2	1	119.149	0	0	0	0
2	31	3	0	0	0	25.28	140	82	3.15	47.9	2.18	150.7	4.57	1.52	1.13	3.52	397.026	11.86	20.58	11.4	1	126.002	1	0	0	0
2	32	6	0	0	1	26.37	130	70	4.07	41.6	15.6	196	3.99	0.76	1.38	2.2	539.161	7.16	15.39	7.8	1	131.062	0	0	0	0
2	33	6	0	0	0	24.03	138	87	5.2	32.2	3.27	208.5	3.89	0.86	0.9	2.81	547.268	10.96	21.7	10.1	1	141.587	1	0	0	0
2	35	0.2	0	0	0	27.7	100	66	2.4	43	10.9325	195.9	7.13	0.95	1.96	3.51	540.77	9.59	23.76	14.9	1	126.939	0	0	0	0
2	39	2	0	0	0	17.29	131	80	3.5	45	6.20021	158.9	4.31	1.17	0.99	2.95	586.8	14.48	23.02	9.3	1	121.59	0	0	0	0
2	40	0	0	0	0	21.64	145	83	3.71	48.9	4.15	181.8	4.22	0.83	1.11	3.24	659.098	7.4	26.81	10.1	1	117.482	0	0	0	0
2	40	2	0	0	0	25.23	120	80	4.81	57.3	8.01	105.9	5.21	0.76	1.38	3.39	624.617	16.47	35.75	12.3	1	111.511	0	0	0	0
2	41	0.2	0	0	0	22.03	111	76	2.9	47	21.75	173.6	6.56	1.49	1.71	4.9	531.188	6.22	12.19	9.9	1	118.19	0	0	0	0
2	41	0.5	0	0	0	31.65	113	69	4.97	47.6	4.86	167.1	3.87	1.27	1.04	2.61	894.172	4.89	14.2	7.2	1	117.698	0	0	0	0
2	41	11	0	0	1	22.27	139	89	4.45	41.6	29.44	179.2	4.35	2.17	1.06	2.7	571.704	14.79	25.48	10.2	1	123.033	0	1	0	0
2	41	3	0	0	0	28.65	136	80	2.88	50.4	3.74	217.2	4.03	1.68	1.03	2.01	268.363	5.25	14.08	5.8	1	115.505	0	0	0	0
2	42	0.5	0	0	0	22.04	115	62	5.1	50.2	21.75	163.2	4.85	0.99	1.18	3.31	436.44	9.82	18.63	8.9	1	114.847	0	0	0	0
2	42	2	0	0	1	27.34	108	65	2.71	56.1	21.75	211.4	4.51	1.21	1.08	2.99	396.41	6.06	15.57	7	2	110.724	1	0	0	0
2	42	3	0	0	1	23.24	110	69	7.08	55	2.54	184.4	4.89	4.15	1.13	2.62	182.972	11.09	23.13	11.5	1	111.448	0	0	0	0
2	42	6	0	0	0	23.83	128	72	4.92	44	7.33	176	5.18	1.67	0.99	3.59	502.628	9.18	18.2	8.8	1	119.938	1	0	0	0
2	43	3	0	0	0	26.35	110	80	3.12	50.6	16.19	196.6	3.44	1.37	0.79	2.4	561.53	4.83	11.93	6.2	1	113.746	0	0	0	0
2	43	8	0	0	0	21.34	126	74	4.95	59.8	24.76	199.6	4.85	1.73	0.94	3.85	401.524	8.05	24.38	7.9	1	107.663	0	0	0	0
2	44	0.5	0	0	0	22.04	140	80	3.14	43.3	6.67046	170.8	4.02	1.15	0.76	2.87	608.474	4.84	11.85	5.8	1	118.89	1	0	0	0
2	44	0	0	0	1	32.99	157	97	2.65	56.8	11.34	183.4	4.5	1.75	0.9	3.39	465.756	6.61	17.39	7.2	1	108.735	1	0	0	0
2	44	2	0	0	0	17.91	126	78	6.49	45.2	3.8	213.6	3.31	1.11	0.75	2.3	468.532	15.25	26.81	10.8	1	117.222	0	0	0	0
2	44	6	0	0	0	34.85	136	76	4.73	49.5	2.00976	190.8	4.89	0.91	0.92	3.64	624.146	6.48	20.99	9.1	1	113.769	0	0	0	0
2	44	8	0	0	0	33.77	117	71	3.66	32.1	23.88	154.9	4.58	1.29	0.91	2.87	701.332	4.25	11.32	7.4	1	131.193	1	0	0	0
2	45	2	0	0	0	25.71	120	70	3.82	53.1	5.24	195.1	3.07	1.12	0.92	1.67	621.052	8.41	18.98	8	1	110.393	0	0	0	0
2	45	7	0	0	0	25	122	85	4.92	42.3	3.97	162.3	4.12	0.92	1.56	2.07	673.174	8.38	17.43	7.9	1	118.969	0	0	0	0
2	46	0.6	0	0	0	24.98	112	74	2.52	59.7	2.77	210	3.36	2.17	0.83	2.11	674.134	6.24	17.09	7	2	105.476	0	0	0	0
2	46	1	0	0	0	28.52	120	70	5.3	30.4	22.1669	212.5	3.96	1.43	0.77	2.15	570.323	6.33	18.04	6.7	1	131.699	1	0	0	0
2	46	3	0	0	0	23.03	125	83	6.46	55.4	2.05	205.3	5.54	1.06	1.49	4.17	617.423	12.24	21.42	10.6	1	108.102	1	0	0	0
2	46	5	0	0	0	26.04	118	80	3.63	43.8	3.09	211.1	4.16	0.88	1.34	2.31	574.165	3.99	11.38	5.7	1	116.789	0	0	0	0
2	46	7	0	0	0	26.04	130	80	4.15	79	3.81	179.4	4.46	1.02	1.29	2.13	380.994	6.22	18.79	7.2	2	77.5856	0	0	0	0
2	47	1	0	0	1	29.04	150	110	2.95	37.3	9.75	169.3	4.18	3.35	1.03	2.25	489.21	8.16	18.07	7.3	1	122.266	1	0	0	0
2	47	3	0	0	0	30.86	120	69	3.8	49	21.75	213.8	3.01	1.77	0.77	1.58	410.29	6.97	15.84	8.7	1	111.769	0	0	0	0
2	47	8	0	0	0	20.7	110	70	3.3	37	21.75	161.7	4.49	2.23	0.9	2.51	343.69	14.5	23.68	9.9	1	122.591	0	0	0	0
2	47	8	0	0	1	28.58	130	70	3.9	52.5	6.25	202.1	3.02	1.03	0.87	1.72	271.554	12.89	23.57	10.1	1	109.261	0	0	0	0
2	47	9	0	0	0	25.32	103	74	7.07	59.9	21.75	134.6	4.78	0.44	1.82	2.29	307.836	8.52	21.47	8.7	1	104.622	0	0	0	0
2	48	1	0	0	0	34.06	116	77	5.39	31.7	5.2	195.8	5.2	1.81	0.95	3.57	580.433	11.2	19.28	9.2	1	128.085	0	0	0	0
2	48	10	0	0	0	28.12	130	80	7.7	56	11.8027	163.4	5.47	0.85	1.49	3.03	244.54	15.19	26.9	11.5	1	106.217	0	0	0	0
2	48	10	0	0	0	21.76	116	66	5.9	54	20.566	198.1	3.24	0.58	1.35	1.46	320.76	9.79	16.75	9	1	107.495	0	0	0	0
2	48	3	0	1	0	20.45	150	84	3.14	38	9.16	179.7	5.7	1.45	1.18	3.78	785.603	5.82	14.68	8.5	1	120.67	1	0	0	0
2	48	5	0	0	0	28.2	110	65	3.76	34.7	8.43	207.6	5.84	2.27	1.4	2.94	457.623	10	18.07	8.9	1	124.331	1	0	0	0
2	48	8	0	0	0	23.52	110	68	4.76	34.1	12.1563	195.5	5.15	2.73	0.97	3.16	655.237	9.4	19.33	9.7	1	125.046	1	0	0	0
2	49	0.2	0	0	0	18.6	119	82	5.1	44	3.2863	172	7.05	0.94	1.18	5.4	4540.02	14.62	25.05	10.7	1	114.183	0	0	0	1
2	49	1	0	0	0	35.65	150	90	4.2	90	9.15073	189.6	4.86	1.32	1.16	3.35	259.505	8.58	19.13	8.9	2	64.8905	0	0	0	0
2	49	10	0	0	0	24.61	143	78	5.54	53.8	15.48	150	6.22	3.21	1.05	4.24	543.889	12.75	22.67	10.2	1	106.873	0	1	0	0
2	49	10	0	0	1	30.47	148	76	4.75	47.9	11.15	195.5	3.45	3.93	1.02	1.72	455.293	11.02	16.75	7.3	1	111.036	1	1	0	0
2	49	10	0	0	0	22.14	120	70	4.88	51.9	7.06	194.5	6.16	4.8	1.1	3.3	372.354	10.21	16.68	9	1	108.145	0	0	0	1
2	49	11	0	0	0	18.07	145	76	6	43.5	3.09	194.7	4.65	0.56	1.89	2.5	639.24	7.1	19.63	9	1	114.613	0	0	0	0
2	49	3	1	1	1	30.86	120	82	4.23	37.7	10	163.9	4.82	2.41	0.93	3.23	453.631	12.38	20.97	9	1	120.138	1	0	0	0
2	49	7	0	0	1	26.49	130	80	5.42	45.2	4.08	185.9	6.17	1.85	1.27	4.38	616.77	12.7	21.06	8.5	1	113.176	1	0	0	0
2	49	8	0	0	0	22.94	103	70	3.95	49.3	4.27	204.3	5.71	1.13	1.15	4.13	613.209	10.23	22.44	9.5	1	109.989	1	0	0	0
2	49	9	0	0	0	23.44	130	95	4.44	55.9	22.66	207.6	4.82	2.04	0.93	2.61	522.95	10.51	18.68	11.3	1	105.535	0	0	0	0
2	50	1	0	0	0	24.03	108	76	2.8	43	9.73819	213.6	3.11	0.81	1.07	1.65	429.786	13.03	24.64	11.3	1	114.244	0	0	0	0
2	50	11	0	0	0	29.69	116	54	3.5	37.4	8.24	220.4	0.99	1.41	0.99	3.68	455.069	6.3	18.88	8	1	119.611	0	0	0	0
2	50	12	0	0	1	21.94	127	65	5.1	42.8	3.52	192.4	3.56	1.24	0.96	2.28	600.078	10.45	21.13	9.7	1	114.419	1	0	0	0
2	50	2	0	0	0	22.43	118	70	5.58	49.6	3.55	170.8	4.36	2.36	1.18	2.77	457.874	10.01	19.15	8.1	1	109.001	1	0	0	0
2	51	0.1	0	0	1	24.03	151	86	3.91	58.3	2.91	215.1	5.33	2.08	0.96	2.99	813.033	11.28	31.26	11.5	1	102.634	1	0	0	0
2	51	0	0	0	0	23.63	125	70	3.93	52.2	5.45	189.2	5.84	1.4	1.12	4.29	492.096	8.57	16.72	8.9	1	106.434	0	0	0	0
2	51	10	0	0	0	29.39	105	66	5.07	50.6	28.5074	184.8	7.35	1.4	1.22	5.41	586.145	7.2	18.26	7.8	1	107.53	0	0	0	0
2	51	10	0	0	0	24.09	122	79	5.7	41.2	7.5	216.3	4.97	0.89	1.41	3.18	558.819	14.09	19.09	13.6	2	115.052	1	0	0	1
2	51	2	0	0	0	21.94	109	70	3.68	68.9	1.91	208.4	4.69	3.55	0.92	2.86	288.017	6.51	11.31	5.9	2	88.3795	0	0	0	0
2	51	4	0	0	0	22.51	140	80	6.12	40.4	8.5	215	4.39	2.15	0.77	3.04	721.142	10.41	18.25	10.04	1	115.796	1	0	0	0
2	51	5	0	0	0	32.81	154	92	2.68	44.1	26.2198	188.4	4.4	2.99	0.93	2.59	518.847	9.54	18.09	11.5	1	112.506	1	0	0	0
2	51	5	0	0	0	22.07	140	90	5.04	59.7	4.6	219.7	4.58	1.63	1.23	3.11	614.673	4.82	16.76	6.8	2	101.835	0	0	0	0
2	52	0.25	0	0	0	27.39	116	88	3.76	40.6	13.94	184.6	4.42	1.1	1.05	2.63	548.675	7.89	18.32	14.1	1	114.799	0	0	0	0
2	52	0.5	0	0	0	25.39	173	93	5.3	49	20.78	149.7	3.82	0.63	1.49	2.15	711.12	7.52	22.72	9.9	1	107.912	1	0	0	1
2	52	0	0	0	0	19.05	98	57	10.02	42	11.62	147.7	4.8	1.35	1.43	3.01	421.667	7.03	13.77	11.7	1	113.526	0	0	0	1
2	52	0	0	0	0	29.64	125	80	5.22	53.7	3.53	192.6	4.34	1.09	1.22	3	529.078	14.85	25	12.7	1	104.708	0	0	0	0
2	52	0	0	0	0	30.04	117	80	3.4	48	23.5768	165	3.61	1.18	1.06	2.12	349.42	13.75	26.87	11	1	108.646	1	0	0	0
2	52	10	0	0	1	33.56	100	62	6.94	44.8	13.01	151	4.37	1.87	0.87	2.6	526.665	14.41	26.12	12	1	111.141	1	0	0	0
2	52	10	0	0	0	21.37	120	89	4.59	55.6	4.42	174.8	5.57	1.64	1.1	4.25	595.848	12.41	26.48	9.1	1	103.518	1	0	0	0
2	52	4	0	0	0	24.98	155	90	5.1	51.1	5.3	171.4	5.06	2.11	0.93	3.39	358.321	12.67	20.14	11.8	1	106.432	0	0	0	0
2	52	8	0	0	1	27.56	132	73	6.25	73	14.43	201.2	6.25	3.24	0.88	4.61	697.602	25.62	36.79	15	2	81.8371	1	0	0	0
2	52	8	0	0	0	28.23	128	69	5.7	35.6	7.37	90.2	4.81	2.33	1.45	3.2	364.873	9.55	20.74	12	1	119.872	1	1	0	1
2	53	0.5	0	0	1	24.97	103	70	3.57	45.8	8.3	162.2	5.52	1.64	1.55	3.74	678.813	6.61	16.09	8.8	1	109.564	0	0	0	0
2	53	0.5	0	0	1	20.96	97	65	6.73	36.7	12.5343	198.7	4.85	1.82	1.16	3.32	462.253	11.09	15.2	10.2	1	117.847	0	0	0	0
2	53	10	0	0	1	22.04	120	65	5.4	51.5	8.83	182.9	3.97	1.78	1.24	1.94	345.154	16.06	25.2	12.3	1	105.416	0	0	0	0
2	53	10	0	1	0	28.2	106	66	4.72	48.4	2.08	215.5	4.92	1.57	1.18	3.32	608.971	12.53	22.71	8	1	107.592	0	0	0	1
2	53	11	0	0	1	18.42	100	62	5.16	44.2	8.63	198.9	4.2	1.26	1.13	2.85	717.893	12.84	24.22	8.4	1	110.853	0	1	0	1
2	53	3	0	1	0	29.74	127	60	4.16	39.1	3.6	50.2	4.54	0.86	1.38	2.82	899.032	13.68	29.16	13.4	1	115.416	0	0	0	0
2	53	4	0	0	0	22.14	100	65	4.3	42	21.75	164.8	4.88	0.7	2.08	2.78	1073.96	16.41	30.12	14.1	1	112.731	0	0	0	0
2	53	5	0	0	0	29.41	110	70	2.8	38.1	21.75	148.9	4.45	1.19	1.59	2.4	529.5	12.63	15.29	12.7	1	116.404	0	0	0	0
2	54	0.1	0	0	1	22.41	130	75	2.35	41.7	13.52	183.2	6.41	1.46	1	5.07	466.748	8.95	24.56	9.4	1	112.206	0	0	0	0
2	54	11	0	0	0	19.81	110	70	5.4	45.6	19	219.4	5.31	1.69	1.63	3.06	424.294	14.19	24.86	9	1	108.954	0	0	0	0
2	54	18	0	0	0	21.5	135	80	6.15	41.9	22.66	205.5	5.06	1.34	1.12	3.96	589.212	13.7	23.03	8.8	1	112.03	1	0	0	0
2	54	6	1	0	0	22.6	172	120	3.31	56.7	26.2491	199	4.94	5.84	0.82	1.94	351.369	18.12	26.98	11	1	101.418	1	0	0	0
2	54	9	0	0	0	19.63	113	61	4.1	46	16.8207	159.5	3.75	0.87	1.29	1.74	369.58	7.28	12.48	6.7	1	108.641	0	0	0	0
2	55	0.5	0	0	0	29.64	110	75	5.48	52	4.86	216.6	5.42	1	2.04	3.34	613.933	6.3	16.05	8.1	1	103.616	1	0	0	1
2	55	10	0	0	0	30.04	123	76	6.8	44	21.75	207.9	4.85	1.6	1.12	2.92	262.9	10.06	20.64	11.2	1	109.47	0	0	0	0
2	55	10	0	0	0	22.96	104	60	5.3	37.8	29.6185	213	4.17	0.94	1.11	2.64	627.849	13.29	28.15	12.6	1	115.079	0	0	0	0
2	55	10	0	0	0	25.78	130	80	4.1	59.8	16.8	207	5.75	1.47	1.12	3.63	627.251	9.5	17.78	10.1	1	98.9593	0	0	0	0
2	55	2	0	0	0	27.12	167	88	4.9	45	22.66	187.6	7.71	2.27	1.19	5.01	569.43	10.02	16.61	8.6	1	108.664	0	0	0	0
2	55	3	0	0	1	20.06	120	70	4.5	69.5	4.2	208.9	5.88	0.4	1.59	3.64	549.291	3.68	7.29	6	1	85.0346	0	0	0	0
2	55	4	0	0	0	20.83	97	64	5.25	66.3	21.75	202.8	5.49	0.81	1.41	3.85	448.427	3.71	8.29	6.8	1	90.0214	0	0	0	0
2	55	7	0	0	0	24.77	120	80	3.75	55.4	5.31	163.7	5.27	1.61	1.17	3.3	252.868	9.53	20.17	10.6	1	101.479	0	0	0	0
2	55	8	0	0	0	29.38	100	80	7.49	54.2	16.9681	161.8	4.66	1.14	1.64	2.31	619.286	13.05	25.11	11.4	1	102.213	0	0	0	1
2	56	0.4	0	0	0	25.39	120	80	4.97	45.6	2.5	218.7	4.55	1.76	1.25	2.23	484.264	9.27	27.06	10.3	1	107.434	1	0	0	0
2	56	0.5	0	0	0	27.06	110	65	4.37	61.8	6.89	214.5	6.56	1.71	0.96	5.04	547.543	5.45	14.66	6.4	1	97.2087	1	0	0	0
2	56	10	0	0	0	25.04	103	62	5.04	48.8	4.16	128.1	3.8	1	1.61	1.92	666.412	11.37	30.41	6.8	1	105.063	0	0	0	0
2	56	10	0	0	0	18.51	120	65	3.8	40	11.36	193.7	4.26	1.76	1.32	2	325.536	8.18	15.76	10.6	1	112.166	0	0	0	0
2	56	3	0	0	0	25.59	122	81	3.6	39	16.6782	220.3	4.04	2.79	0.8	2.19	513.01	11.44	19.61	10.2	1	113.105	1	0	0	0
2	56	9	0	0	1	21.51	160	91	5.09	49.5	16.8207	183.9	4.86	2.32	1.11	3.01	447.682	7.46	16.04	8.3	2	104.572	1	0	0	0
2	57	0.2	0	0	0	26.95	102	67	5.4	43.5	20.8111	146.7	5.9	0.98	1.6	4.03	457.59	15.63	24.95	13.6	1	108.349	0	0	0	0
2	57	0.25	0	0	0	25.81	130	70	4.6	48	21.75	213.8	5.79	2.27	0.93	3.6	575.4	14.01	28.37	9.4	1	104.897	0	0	0	0
2	57	0.4	0	0	0	25.3	130	80	3.38	44.8	20.27	190.5	5.54	1.67	1.42	3.65	454.641	11.49	21.54	12.4	1	107.305	1	0	0	0
2	57	0	0	0	0	22.77	107	69	4.92	53.4	9.87	155.7	3.53	0.69	1.07	2.22	353.58	13.67	27.65	14	1	101.281	1	0	0	0
2	57	1	0	0	0	25.78	180	80	5.94	38	3.94	187.4	4.54	1.04	1.57	2.65	774.968	7.46	16.58	11.9	1	113.277	0	1	0	0
2	57	12	0	0	1	26.73	124	82	3.5	51.1	12.99	165.8	4.72	2.54	0.72	2.8	640.13	6.9	16.26	7.4	1	102.759	0	0	0	0
2	57	13	0	0	0	30.82	167	107	5.1	46	5.14	207.4	5.31	1.36	1.05	3.3	348.46	7.3	20.16	9	1	106.376	1	0	0	1
2	57	5	0	0	0	32.81	115	67	6.34	83	3.81	215.4	4.84	1	1.48	3.08	557.577	4.43	17.95	6.4	2	67.6532	0	0	0	0
2	57	6	0	0	0	26.35	155	81	4.55	47.9	21.75	204.8	6.84	3.69	0.95	4.99	667.435	18.81	25.1	12.4	1	104.969	1	0	0	0
2	57	7	0	0	1	27.89	111	70	6.72	54	6.57	195.1	4.6	1.45	1.22	2.93	304.368	10.38	20.83	11	1	100.91	0	0	0	1
2	58	0	0	0	0	29	140	90	4.03	38.7	7.57	192.6	5.61	1.51	1.45	4.08	207.66	12.48	26.67	12.9	1	111.81	0	0	0	0
2	58	10	0	0	0	22.04	105	51	4.39	44.3	2.74	146.3	4.46	2.81	0.83	3.02	329.551	9.62	20.65	9.9	1	106.948	1	0	0	0
2	58	10	0	0	0	25.78	156	90	3.87	41	10.7587	218.3	5.9	2.33	1.11	4.06	524.858	23.33	34.73	9.7	1	109.707	1	0	0	0
2	58	11	0	0	0	27.99	116	67	6.1	59	8.65872	193.2	5.14	1.53	1.25	2.82	307.38	13.28	17.7	11.1	1	97.3259	0	0	0	1
2	58	14	0	0	0	23.03	140	86	7.42	69.2	11.52	175.2	7.66	1.75	2.37	5.57	669.271	20.91	28.77	16	2	83.698	0	0	0	1
2	58	4	0	0	0	30.04	139	84	5.5	49.7	3.99	197.9	3.7	1.56	1.15	2.08	344.82	11.58	21.99	10.1	1	102.976	1	0	0	0
2	58	5	0	0	0	27.12	120	80	3.22	54.9	8.81	217.4	4.1	1.18	0.94	2.67	475.513	5.48	15.25	7.3	1	99.6597	0	1	0	0
2	59	0	0	0	0	24.52	127	66	4.62	54.5	5.9	173.8	3.74	0.57	1.33	2.33	531.655	12.05	23.94	9.9	1	99.2005	0	0	0	1
2	59	1	0	0	1	29.3	143	78	4.58	47.9	4.11	213.5	3.96	1.95	1.17	2.15	179.74	6.91	16.2	8	1	103.504	1	0	0	0
2	59	12	0	0	0	24.34	138	77	5.37	58.1	11.7551	211.4	5.11	0.83	1.57	3.21	472.571	5.69	13.94	6.2	1	97.1347	0	0	0	0
2	59	9	0	0	0	29	126	80	4.1	55.4	26.28	206.1	5.03	1.97	1.08	3.11	153.805	13.8	26.35	10	1	98.6674	0	1	0	0
2	60	0.1	0	0	0	36.05	103	70	5.12	38	12.34	170	2.98	0.89	1.18	1.51	120.471	3.86	17.93	7.5	1	110.915	0	0	0	0
2	60	0.1	0	0	0	31.25	97	57	4.22	57.1	3.65	114	4.2	1.39	2.12	2.21	532.995	10.28	22.11	11.7	1	97.0072	0	0	0	0
2	60	1	0	0	0	24.75	141	89	7.4	45.7	16.76	156	4.19	0.98	1.69	2.11	220.97	11.9	25.32	14.1	1	104.382	0	0	0	0
2	60	1	0	0	0	23.46	130	86	4.23	37.2	21.75	144.9	3.74	1.36	0.93	2.46	436.339	13.94	24.07	13.9	1	111.694	0	1	0	0
2	60	1	0	0	0	26.67	114	68	5.9	46	21.75	201.5	6.92	1.88	1.62	4.15	372.1	6.83	12.36	6.9	1	104.157	0	0	0	0
2	60	10	0	0	0	25.71	126	62	5.7	65	11.3547	93.4	3.71	1.2	1.16	1.9	251.17	4.72	11.55	7.7	1	89.0204	0	0	0	0
2	60	10	0	0	1	27.06	145	64	3.11	36.7	6.99	202.1	4.78	1.54	1.11	3.62	521.817	11.04	22.3	8.7	1	112.192	1	0	0	0
2	60	14	0	0	1	23.51	110	70	3.96	46.8	6.07	204.6	3.05	0.57	1.17	1.86	457.294	4.83	14.12	5.2	1	103.568	0	0	0	0
2	60	18	0	0	0	24.88	150	90	5.46	59	12.0012	218.1	4.91	2.14	1.01	3.53	790.253	13.2	24.66	8.8	1	95.9682	1	0	0	0
2	60	7	0	0	1	27.34	118	53	3.45	45.4	13.776	199.5	5.17	2.08	1.49	3.1	226.028	5.13	8.26	5.8	1	104.608	1	0	0	0
2	61	0.1	0	0	0	31.63	106	68	4.62	51.1	4.34	194	4.4	2.13	0.94	2.26	523.178	16.2	24.64	12.3	1	99.9117	1	0	0	0
2	61	0.4	0	0	0	24.97	103	59	5.03	45.3	7.36	200.5	4.81	1.24	0.92	3.27	432.335	10.97	18.05	8.9	1	103.951	1	0	0	0
2	61	0	0	0	0	23.44	138	74	4.3	79	26.1227	207.7	6.03	1.36	1.14	4.38	492.33	8.01	21.61	11.4	1	69.8264	1	0	0	0
2	61	1	0	0	0	28.67	150	80	3.85	48.5	21.75	89.3	3.32	1.5	0.97	2.04	641.064	11.4	26.07	9.3	1	101.643	1	0	0	0
2	61	10	0	0	0	22.77	161	90	6.9	43	21.75	159.1	5.41	1.38	1.28	3.63	854	14.88	26.39	10.9	1	105.749	0	0	0	1
2	61	18	0	0	0	25.15	130	70	2.9	65	11.5776	202.5	4	1.27	0.87	2.47	199.92	10.68	17.4	10.5	1	88.3972	0	0	0	0
2	61	2	0	0	0	32.46	140	86	4.62	58.1	4.55	214.1	3.75	0.55	1.07	2.43	577.611	17.23	27.9	13.5	1	95.7795	0	0	0	0
2	61	2	0	0	1	24.03	136	88	4.37	80.2	13.59	169.5	6.08	1.22	1.38	3.91	262.857	5.28	9.97	7.5	2	68.5653	0	0	0	0
2	61	5	0	0	0	22.49	130	70	5.8	40.5	26.8831	180.3	3.43	0.83	1.35	1.36	543.467	12.64	23.99	11.5	1	107.853	0	1	0	0
2	61	7	0	0	0	24.03	136	78	3.2	37	26.671	183.9	4.7	2.21	1.01	2.91	496.02	9.37	20.01	7.1	1	111.109	0	0	0	1
2	62	0.25	0	0	0	25.56	185	106	6.28	42.9	3.99	195.7	5.23	1.66	1.43	3.05	640.843	18.47	32.8	14.4	1	105.089	0	0	0	0
2	62	0.5	0	0	1	26.95	120	73	5.74	80.2	21.95	162.4	8.06	1.28	1.64	5.77	495.054	11.52	19.47	10	2	68.0853	1	0	0	0
2	62	15	0	0	0	30.12	123	79	4.6	46	19.6881	177.6	4.41	0.58	1.11	2.72	109.07	13.34	22.59	11.4	1	102.704	0	0	0	0
2	62	3	0	0	0	32.03	138	75	7.12	53.5	6.95	206.1	5.56	1.82	1.59	3.28	285.573	11.62	25.57	12.3	1	97.7254	0	0	0	0
2	62	4	0	0	0	28.76	151	73	3.54	64.7	4.34	214.5	4.41	1.44	0.9	2.54	789.343	9.43	17.44	9.1	1	88.2708	0	0	0	0
2	62	5	0	0	0	28.35	118	72	5.69	69.2	3.69	160.4	5.86	2.64	1.37	3.95	718.424	17.49	27.13	10.9	2	81.3789	0	1	0	0
2	62	5	0	0	0	29.55	126	72	3.96	50.9	10.85	178.5	4.35	1.43	1.1	3.09	562	7.36	20.61	12.6	1	99.3404	1	1	0	1
2	62	7	0	0	1	19.38	145	90	2.37	36.1	9.26	178.9	5.57	1.87	1.04	3.85	605.272	5.74	17.79	8.1	1	111.228	1	0	0	0
2	62	8	0	0	0	33.43	138	76	6.7	54.2	7.83	215.1	4.01	1.47	0.99	2.43	896.19	12.85	23.25	10.2	1	97.3084	1	0	0	1
2	62	8	0	0	0	24.91	110	70	5.5	43	6.39318	174.7	3.28	0.84	1.02	1.68	558.19	10.13	21.08	9.6	1	105.009	1	0	0	0
2	63	0.1	0	0	1	31.25	156	100	5.9	52.8	13.02	198.1	5.16	1.37	0.98	3.87	336.044	14.83	32.63	13.3	1	97.4627	1	1	0	0
2	63	1	0	0	0	17.43	139	76	4.96	55.2	4.34	170.7	4.15	1.31	1.78	2.01	594.809	6.25	23.82	13.1	1	96.0478	0	0	0	0
2	63	13	0	0	0	23.63	130	76	3.49	56.9	4.96	145	5.02	1.2	0.97	3.36	406.987	6.04	17.06	6.5	2	95.094	0	0	0	0
2	63	19	0	0	0	25.1	157	71	5.18	44	7.65	188.3	5.82	4.09	1.11	3.62	637.563	5.37	12.49	7.3	1	103.488	1	0	0	1
2	63	4	0	0	0	27.89	113	75	4.25	50.9	21.75	194	3.78	1.48	0.88	2.12	773.891	9.04	19.23	8.4	1	98.645	1	0	0	0
2	64	0.1	0	0	0	21.67	110	70	2.5	48	21.75	190.9	5.42	0.93	1.38	3.26	648.19	11.04	20.97	12.3	1	99.8633	0	0	0	0
2	64	0.2	0	0	0	26.53	133	70	4.7	46	9.42404	205.9	4.96	3.52	1.25	2.41	393.92	8.22	14.13	9	1	101.271	1	0	0	0
2	64	0.25	0	0	0	25.24	131	71	7.93	48.9	10.44	165.7	3.33	1.43	1.14	1.47	434.558	3.9	10.27	7.3	2	99.2549	0	0	0	0
2	64	0.5	0	0	0	27.1	127	75	5.56	54.3	5.67	176.5	6.71	0.81	1.3	5.13	793.555	14.74	24.93	13.7	1	95.8926	0	0	0	0
2	64	0	0	0	1	28.04	135	80	6.09	59.7	20.22	166.4	5.12	1.29	1.19	3.81	595.43	4.75	19.4	9.2	1	92.9478	0	0	0	0
2	64	10	0	0	0	25.69	134	74	8.1	58.2	21.0427	216.9	4.6	1.95	1.08	2.76	770.33	9.75	25.61	11.1	1	93.7292	0	0	0	0
2	64	10	0	0	0	25.81	140	75	6.72	52.9	17.7516	161.2	4.46	1.69	1.03	2.6	623.244	6.53	17.59	8.5	1	96.7203	1	0	0	0
2	64	12	0	0	1	27.34	147	74	5.59	51.6	3.19	199.8	5.5	0.62	1.91	2.86	333.958	6.84	20	9.5	1	97.5153	0	1	0	0
2	64	4	0	0	0	28.98	111	62	4.71	37.6	4.42	71.9	4.48	0.47	1.49	2.53	627.439	5.6	23.33	12.6	1	108.218	0	0	0	0
2	64	5	0	0	0	26.67	140	88	6.73	59.7	21.75	100.3	5.78	0.88	1.86	2.79	386.001	4.92	16.36	6.8	1	92.9478	0	0	0	0
2	64	8	0	0	0	21.63	153	55	6.5	52	11.33	187.6	5.35	0.91	1.09	3.67	675.32	10.8	19.13	9.2	1	97.2679	0	0	0	0
2	64	9	0	0	0	20.96	140	70	8.3	55.2	22.66	159.3	3.93	1.32	1.27	2.19	306.41	8.54	17.38	7.5	1	95.3754	0	0	0	0
2	65	0.1	0	0	0	30.41	130	76	3	50	0.301371	216.5	5.92	1.78	1.15	3.83	199.05	7.58	18.89	8.6	1	97.8414	0	0	0	0
2	65	0.1	0	0	0	20.81	146	80	3.65	54.9	2.43	214.5	4.95	1.49	1.1	3.56	232.637	7.81	18.26	7.2	2	94.8778	0	0	0	0
2	65	0.25	0	0	0	23.44	115	72	5.67	51.6	8.39	211.3	4.38	1.3	0.97	3	532.515	8.55	12.82	14	1	96.8327	1	0	0	0
2	65	1	0	0	0	32.85	120	75	4.1	43	21.75	166.9	4.91	0.97	1.35	3.18	550.63	9.39	24.26	8.8	1	102.819	0	0	0	0
2	65	10	0	0	0	21.36	191	91	6.6	62	7.54802	215.3	3.33	1.46	0.79	2.11	641.31	16.34	22.67	8.3	1	91.0011	1	0	0	1
2	65	14	0	0	0	33.2	155	85	7.3	49	9.61	213.9	4.59	1.03	1.25	3.06	792.49	9.47	21.37	7.6	1	98.4939	0	1	0	0
2	65	15	0	0	0	28.12	122	70	5.46	46.1	8.37	137.3	4.1	1.44	1.29	2.16	308.24	15.39	23.4	10.1	1	100.491	0	0	0	0
2	65	15	0	0	0	24.63	130	76	4.6	62	21.75	194.8	4.22	1.76	0.93	2.53	465.77	13.68	27.33	10.3	1	91.0011	0	0	0	0
2	65	17	0	0	0	23.31	120	80	7	68.8	23.33	201.6	6.19	1.56	1.45	3.77	462.567	7.42	14.7	7.2	2	80.2423	0	0	0	0
2	65	18	0	0	0	29.55	120	73	4.8	53.1	4.77	202.1	5.79	2.27	1.03	4.03	419.211	8.99	19.78	8.7	1	95.9241	0	1	0	0
2	65	8	0	0	0	32.46	117	55	5.19	59.6	6.87	165.5	4.49	0.69	1.27	3.08	532.448	7.35	12.12	7.1	1	92.348	0	0	0	1
2	66	12	0	0	0	22.83	170	90	5.42	42.4	21.75	207.3	4.17	2.08	1.2	2.05	543.955	10.3	22.7	11.7	1	102.572	0	0	0	0
2	66	17	0	0	0	27.34	134	78	4.18	52.1	22.66	153.4	4.98	2.34	0.95	3	355.914	6.23	17.42	7.3	1	95.8503	0	0	0	0
2	66	20	0	0	0	23.83	150	80	3.12	56.4	13.6	212.2	3.86	1.41	0.68	2.54	531.382	6.91	18.81	8.9	1	93.3818	0	0	0	0
2	66	3	0	0	0	24.84	150	80	3.49	49.3	13.93	180	5.02	2.55	0.96	2.97	410.776	11.67	21.11	12.4	1	97.6082	0	0	0	0
2	66	6	0	0	0	30.36	135	81	5.64	57.2	6.33	202.7	5.14	0.89	1.16	2.45	467.287	5.92	13.35	7.6	1	92.9501	0	1	0	0
2	67	0.25	0	0	0	23.62	127	70	3.11	32.3	12	197.7	2.96	0.76	1.25	1.6	633.675	6.65	11.24	7.6	1	111.392	0	0	0	0
2	67	10	0	0	0	26.31	134	57	7.16	63	2	154.3	6.03	2.43	1.98	3.2	483.201	4.61	16.97	9.4	1	88.0124	1	0	0	1
2	67	11	1	1	0	26.04	136	85	4.64	55.8	3.78	204.8	3.73	0.99	1.13	2.17	580.414	7.2	21.14	8.6	1	93.055	0	0	0	0
2	67	14	0	0	0	27.39	134	78	7.7	59	27.1319	203.9	3.77	0.55	1.42	1.73	225.25	6.86	16.17	6.3	1	91.3633	0	0	0	0
2	67	3	0	0	0	20.7	158	79	3.89	59.7	21.75	209.7	3.8	2.3	1.07	2.23	552.742	15.5	33.06	11.2	1	91.0095	0	0	0	0
2	67	30	0	0	1	23.83	140	70	5.31	54.7	6.7	182.1	6.98	0.66	2.06	4.22	406.815	4.08	15.7	7.5	1	93.6665	0	0	0	0
2	67	4	0	0	0	27.69	112	75	7.55	46.1	5.23	213.6	4.5	1.97	1.01	2.9	301.895	4.28	17.4	7.7	1	99.0888	0	0	0	0
2	67	6	0	0	0	21.33	144	61	5.32	44.6	28.19	193.4	4.57	3.15	0.87	2.62	702.968	11.14	24.5	11.4	1	100.173	0	0	0	0
2	68	0.25	0	0	0	23.44	136	90	3.39	49.9	13.37	134.6	3.42	1.07	0.82	2.1	533.262	9.1	17.68	9.7	1	95.8642	0	0	0	0
2	68	10	0	0	0	24.84	105	60	6.66	106.9	52.99	196.5	3.49	0.69	0.99	2.33	565.226	7.04	12.22	7.7	3	46.1171	1	0	1	0
2	68	10	0	0	0	25.34	130	80	7.01	59.2	23.12	166.2	4.96	1.75	0.97	3.82	746.502	7.53	19.19	7.3	1	90.6228	0	0	0	0
2	68	11	0	0	0	28	110	51	4.2	57	21.75	153.4	5.22	0.85	1.43	3	411.39	11.79	22.31	7.2	1	91.759	0	0	0	0
2	68	13	0	0	0	24.84	90	60	5.42	53.5	9.81	205.5	4.48	1.47	1.16	3.01	187.838	7.26	20.76	8.2	1	93.6921	1	0	0	0
2	68	14	0	0	0	27.77	133	71	4.7	49	7.83	220.3	6.08	4.31	1.03	2.75	311.72	17.08	22.54	7.1	1	96.4399	0	0	0	0
2	68	15	0	0	0	30.89	102	51	5.26	52.6	5.5	214.1	4.89	3.54	1.24	2.97	707.013	4.92	16.87	8.7	1	94.2165	1	0	0	0
2	68	20	0	0	0	27.3	143	80	4.3	60	3.2	206.8	4.78	1.02	1.57	2.72	270.2	9.44	25.2	10.6	1	90.2235	0	0	0	0
2	68	22	0	0	1	23.68	120	80	3.83	50.9	8.46	201.3	6.54	2.18	1.17	4.7	174.886	13.98	26.34	12.1	1	95.2404	1	0	0	0
2	68	28	0	0	0	25.56	134	71	8	68	21.75	198.8	4.32	2.64	1.01	2.33	856.94	11.22	21.28	10	1	79.6879	1	1	0	0
2	68	4	0	0	0	27.27	130	80	4.26	35.3	5.01	172.9	3.44	0.96	1.18	2.07	478.523	8.33	19.26	10	1	107.427	0	0	0	0
2	68	6	0	0	0	25.15	126	72	6.2	51.2	16.6782	206.8	5.08	2.35	1.15	2.37	265.8	7.53	12.01	7.8	1	95.0565	0	0	0	0
2	69	13	0	0	0	23.83	137	68	3.98	54.3	6.27049	143.6	2.87	1.14	1.16	1.21	291.638	4.43	14.45	9.4	1	92.5831	0	0	0	0
2	69	16	0	0	0	25.2	159	67	2.9	49	18.8371	119.3	5.18	0.74	2.19	2.46	1013.67	7.81	16.58	13	1	95.7649	0	0	0	0
2	69	2	0	0	0	25.03	144	65	4.77	50.4	8.78	145.5	6.36	2.05	1.01	5.2	400.152	12.35	22.14	12	1	94.8814	0	0	0	0
2	69	20	0	0	0	22.55	127	63	4.69	80.4	25	192.2	2.92	0.94	1.28	1.35	655.559	4.02	11.29	10.3	2	64.6235	0	0	0	0
2	69	9	0	0	0	27.06	135	85	4.46	54.4	4.33229	144.4	6.4	0.96	1.5	4.6	495.797	7.51	21.94	8.6	1	92.527	1	0	0	1
2	70	10	0	0	0	24.35	145	83	5.35	54	19.1072	194.6	4.36	2.07	1.46	2.36	486.662	7.69	26.32	7.9	1	92.1027	1	1	0	1
2	70	16	0	0	0	29.33	154	82	4.99	57.2	27.35	211.6	4.72	1.89	1.01	2.87	667.206	5.77	15.26	7.5	2	90.3747	0	0	0	0
2	70	2	0	0	0	28	132	89	4.65	54.7	4.26	154.8	4.83	0.94	1.75	2.72	419.834	13.31	37.78	11.4	1	91.7133	0	0	0	0
[truncated: 810 more rows]
